# Supplementary material for: Rhodium-catalyzed regio- and enantioselective allylic alkylation of pyrazol-5-ones with alkynes
Source: Royal Society of Chemistry journal article supplement (doi:10.1039/d0cc04002a), 2020-01-01
Supplement: d0cc04002a1.pdf [file d0cc04002a1.pdf]

Supporting Information For:

## Rhodium-catalyzed regio- and enantioselective allylic alkylation of pyrazol-5-ones with alkynes

Ding-Wei Ji<sup>†,‡</sup>, Fan Yang<sup>†</sup>, Bing-Zhi Chen<sup>†</sup>, Xiang-Ting Min<sup>†</sup>, Chang-Sheng Kuai<sup>†</sup>,  
Yan-Cheng Hu<sup>†</sup> and Qing-An Chen<sup>\*,†</sup>

<sup>†</sup>Dalian Institute of Chemical Physics, Chinese Academy of Sciences, Dalian 116023, China

<sup>‡</sup>University of Chinese Academy of Sciences, Beijing 100049, China

### Table of Contents

|                                                                                 |     |
|---------------------------------------------------------------------------------|-----|
| 1. General experimental details.....                                            | S1  |
| 2. Screening of reaction conditions.....                                        | S2  |
| 3. Typical procedure for the synthesis of racemic products.....                 | S4  |
| 4. Typical procedure for Rh-catalyzed allylic alkylation of pyrazol-5-ones..... | S4  |
| 5. Control and deuterium labeling experiments .....                             | S13 |
| 6. References.....                                                              | S15 |
| 7. Copy of NMR and HPLC for products.....                                       | S16 |

**1. General experimental details:** All the reagents were commercially available and were used without further purification unless otherwise stated. Solvents were treated prior to use according to the standard methods. 1-Phenyl-1-propyne was purchased from commercial suppliers. Other substituted 1-aryl-1-propyne were prepared by following the literature report.<sup>1</sup> Pyrazol-5-ones were prepared by following the literature report.<sup>2</sup> NMR spectra were recorded at room temperature in CDCl<sub>3</sub> on 400 MHz instrument with tetramethylsilane (TMS) as internal standard. Data are reported as follows: chemical shift in ppm ( $\delta$ ), multiplicity (s = singlet, d = doublet, t = triplet, q = quartet, brs = broad singlet, m = multiplet), coupling constant (Hz), and integration. Flash column chromatography was performed on commercially available silica gel (200-300 mesh). All reactions were monitored by TLC, GC-FID, GC-MS or NMR analysis. HRMS data was obtained with Micromass HPLC-Q-TOF mass spectrometer (ESI) or Agilent 6540 Accurate-MS spectrometer (Q-TOF).

## 2. Screening of reaction conditions for 3a

**Table S1. Screening of chiral ligands<sup>a</sup>**

| <div style="display: flex; justify-content: space-around; align-items: flex-end;"> <div style="text-align: center;"> <p><b>(R)-BINAP (L1)</b></p> </div> <div style="text-align: center;"> <p><b>(R)-DM-BINAP (L2)</b></p> </div> <div style="text-align: center;"> <p><b>(R)-DTBM-BINAP (L3)</b></p> </div> <div style="text-align: center;"> <p><b>R = DTBM<br/>SEGPHOS (L4)</b></p> </div> <div style="text-align: center;"> <p><b>R = DTBM<br/>MeO-BIPHEP (L5)</b></p> </div> <div style="text-align: center;"> <p><b>R = DTBM<br/>GARPHOS (L6)</b></p> </div> </div> |           |                                       |                             |
|---------------------------------------------------------------------------------------------------------------------------------------------------------------------------------------------------------------------------------------------------------------------------------------------------------------------------------------------------------------------------------------------------------------------------------------------------------------------------------------------------------------------------------------------------------------------------|-----------|---------------------------------------|-----------------------------|
| <div style="display: flex; justify-content: space-around; align-items: flex-end;"> <div style="text-align: center;"> <p><b>L7</b></p> </div> <div style="text-align: center;"> <p><b>L8</b></p> </div> <div style="text-align: center;"> <p><b>L9</b></p> </div> </div>                                                                                                                                                                                                                                                                                                   |           |                                       |                             |
| entry                                                                                                                                                                                                                                                                                                                                                                                                                                                                                                                                                                     | ligand    | yield(%) <sup>b</sup> <b>3a/4a/5a</b> | er <sup>c</sup> / <b>3a</b> |
| 1                                                                                                                                                                                                                                                                                                                                                                                                                                                                                                                                                                         | <b>L1</b> | 28/3/6                                | 55:45                       |
| 2                                                                                                                                                                                                                                                                                                                                                                                                                                                                                                                                                                         | <b>L2</b> | 72/10/16                              | 52:48                       |
| 3                                                                                                                                                                                                                                                                                                                                                                                                                                                                                                                                                                         | <b>L3</b> | 68/20/11                              | 84:16                       |
| 4                                                                                                                                                                                                                                                                                                                                                                                                                                                                                                                                                                         | <b>L4</b> | 11/5/12                               | 56:44                       |
| 5                                                                                                                                                                                                                                                                                                                                                                                                                                                                                                                                                                         | <b>L5</b> | 29/12/8                               | 79:21                       |
| 6                                                                                                                                                                                                                                                                                                                                                                                                                                                                                                                                                                         | <b>L6</b> | 13/6/5                                | 75:25                       |
| 7 <sup>d</sup>                                                                                                                                                                                                                                                                                                                                                                                                                                                                                                                                                            | <b>L7</b> | >95/<1/<1                             | 57:43                       |
| 8 <sup>d</sup>                                                                                                                                                                                                                                                                                                                                                                                                                                                                                                                                                            | <b>L8</b> | trace                                 | -                           |
| 9 <sup>d</sup>                                                                                                                                                                                                                                                                                                                                                                                                                                                                                                                                                            | <b>L9</b> | trace                                 | -                           |

<sup>a</sup>Reaction conditions: **1a** (0.10 mmol), **2a** (0.20 mmol), [Rh(COD)Cl]<sub>2</sub> (2.5 mol%), ligand (5.0 mol%), PhCO<sub>2</sub>H (20 mol%), DCE (0.25 M), 50 °C, 18 h. <sup>b</sup>Determined by <sup>1</sup>H NMR analysis with 1,3,5-trimethoxybenzene as the internal standard. <sup>c</sup>Determined by HPLC. <sup>d</sup>TsOH (20 mol%)

**Table S2. Screening of acids<sup>a</sup>**

$\text{1a} + \text{2a} \xrightarrow[\text{DCE (0.25 M), 50 }^\circ\text{C, 18 h}]{[\text{Rh(COD)Cl}]_2 \text{ (2.5 mol\%)} \text{ (R)-DTBM-BINAP (5.0 mol\%) Acid (20 mol\%)}} \text{3a}$

|                                                                                                     |                |                                                                                              |               |
|-----------------------------------------------------------------------------------------------------|----------------|----------------------------------------------------------------------------------------------|---------------|
| PhCO <sub>2</sub> H ( <b>A1</b> )<br>AdCO <sub>2</sub> H ( <b>A2</b> )<br>Citric acid ( <b>A3</b> ) | <br><b>A4</b>  | <br><b>A5</b>                                                                                | <br><b>A6</b> |
| (D)-CSA ( <b>A7</b> )<br>(L)-CSA ( <b>A8</b> )<br>TsOH ( <b>A9</b> )                                | <br><b>A10</b> | (PhO)PO <sub>2</sub> H ( <b>A11</b> )<br>( <sup>n</sup> BuO)PO <sub>2</sub> H ( <b>A12</b> ) |               |

| entry | acid       | yield(%) <sup>b</sup> <b>3a/4a/5a</b> | er <sup>c</sup> / <b>3a</b> |
|-------|------------|---------------------------------------|-----------------------------|
| 1     | <b>A1</b>  | 68/20/11                              | 84:16                       |
| 2     | <b>A2</b>  | 58/16/9                               | 85:15                       |
| 3     | <b>A3</b>  | 57/12/25                              | 87:13                       |
| 4     | <b>A4</b>  | 64/19/12                              | 88:12                       |
| 5     | <b>A5</b>  | 66/18/13                              | 85:15                       |
| 6     | <b>A6</b>  | 28/1/1                                | 91:9                        |
| 7     | <b>A7</b>  | 51/1/2                                | 90:10                       |
| 8     | <b>A8</b>  | 60/1/2                                | 89:11                       |
| 9     | <b>A9</b>  | 43/1/2                                | 90:10                       |
| 10    | <b>A10</b> | 44/1/1                                | 90:10                       |
| 11    | <b>A11</b> | 87/3/2                                | 90:10                       |
| 12    | <b>A12</b> | 84/9/6                                | 89:11                       |

<sup>a</sup>Reaction conditions: **1a** (0.10 mmol), **2a** (0.20 mmol), [Rh(COD)Cl]<sub>2</sub> (2.5 mol%), (R)-DTBM-BINAP (5.0 mol%), acid (20 mol%), DCE (0.25 M), 50 °C, 18 h. <sup>b</sup>Determined by <sup>1</sup>H NMR analysis with 1,3,5-trimethoxybenzene as the internal standard. <sup>c</sup>Determined by HPLC.

**Table S3. Screening of solvents<sup>a</sup>**

$\text{1a} + \text{2a} \xrightarrow[\text{Solvent (0.25 M), 50 }^\circ\text{C, 18 h}]{[\text{Rh(COD)Cl}]_2 \text{ (2.5 mol\%)} \text{ (R)-DTBM-BINAP (5.0 mol\%) (PhO)}_2\text{PO}_2\text{H (20 mol\%)}} \text{3a}$

| entry | solvent | yield(%) <sup>b</sup> <b>3a/4a/5a</b> | er <sup>c</sup> / <b>3a</b> |
|-------|---------|---------------------------------------|-----------------------------|
| 1     | DCE     | 87/3/2                                | 90:10                       |

|                |                   |        |           |
|----------------|-------------------|--------|-----------|
| 2              | Et <sub>2</sub> O | 82/9/8 | 87:13     |
| 3              | Toluene           | 62/7/6 | 87.5:12.5 |
| 4              | EtOH              | 89/4/6 | 90:10     |
| 5              | THF               | 80/6/5 | 89:11     |
| 6 <sup>d</sup> | DCE               | 89/2/2 | 91:9      |

<sup>a</sup>Reaction conditions: **1a** (0.10 mmol), **2a** (0.20 mmol), [Rh(COD)Cl]<sub>2</sub> (2.5 mol%), (*R*)-DTBM-BINAP (5.0 mol%), (PhO)<sub>2</sub>PO<sub>2</sub>H (20 mol%), solvent (0.25 M), 50 °C, 18 h. <sup>b</sup>Determined by <sup>1</sup>H NMR analysis with 1,3,5-trimethoxybenzene as the internal standard. <sup>c</sup>Determined by HPLC. <sup>d</sup>35 °C, 3 d.

### 3. Typical procedure for the synthesis of racemic products 3

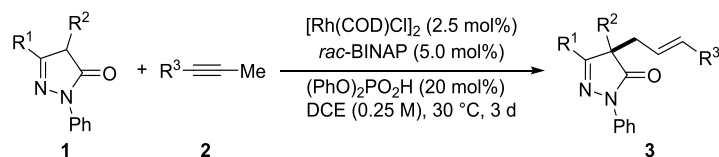

In glove box, a sealed tube was charged with pyrazol-5-one **1** (0.1 mmol, 1.0 equiv), [Rh(COD)Cl]<sub>2</sub> (0.0025 mmol, 2.5 mol%), *rac*-BINAP (0.005 mmol, 5 mol%), (PhO)<sub>2</sub>PO<sub>2</sub>H (0.02 mmol, 20 mol%) and DCE (0.4 mL) at room temperature. Then alkyne **2** (0.20 mmol, 2.0 equiv) was added and the reaction tube was sealed with a teflon screw cap, removed from the glove box and stirred at 35 °C for 3 days. After cooling to room temperature, the reaction mixture was concentrated in vacuo and purified by column chromatography on silica gel using petroleum ether (PE) and ethyl acetate (EA) to afford the corresponding racemic product **3**.

### 4. Typical procedure for Rh-catalyzed allylic alkylation of pyrazolones

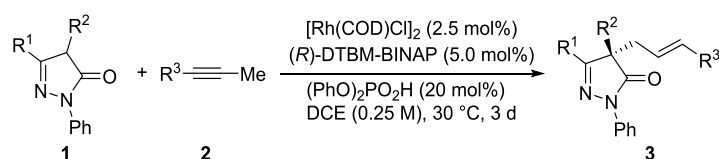

In glove box, a sealed tube was charged with pyrazol-5-one **1** (0.1 mmol, 1.0 equiv), [Rh(COD)Cl]<sub>2</sub> (0.0025 mmol, 2.5 mol%), (*R*)-DTBM-BINAP (0.005 mmol, 5 mol%), (PhO)<sub>2</sub>PO<sub>2</sub>H (0.02 mmol, 20 mol%) and DCE (0.4 mL) at room temperature. Then alkyne **2** (0.20 mmol, 2.0 equiv) was added and the reaction tube was sealed with a teflon screw cap, removed from the glove box and stirred at 35 °C for 3 days. After cooling to room temperature, the reaction mixture was concentrated in vacuo and purified by column chromatography on silica gel using petroleum ether (PE) and ethyl acetate (EA) to afford the corresponding chiral product **3**. The enantioselectivity was determined by chiral HPLC.

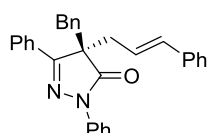

**(*R,E*)-4-benzyl-4-cinnamyl-2,5-diphenyl-2,4-dihydro-3H-pyrazol-3-one (**3a**)**: Prepared according to the general procedure, colorless oil, 86% yield, known product,<sup>3</sup> 91:9 er, [ $\alpha$ ]<sub>D</sub><sup>20</sup> = -21.9 (*c* 0.72, CHCl<sub>3</sub>), *R*<sub>f</sub> = 0.40 (PE/EA =



10:1). **<sup>1</sup>H NMR** (400 MHz, CDCl<sub>3</sub>)  $\delta$  7.97 – 7.94 (m, 2H), 7.65 – 7.62 (m, 2H), 7.51 – 7.48 (m, 3H), 7.31 (t,  $J$  = 7.9 Hz, 2H), 7.19 – 7.08 (m, 6H), 7.06 – 7.00 (m, 3H), 6.93 – 6.90 (m, 2H), 6.40 (d,  $J$  = 15.7 Hz, 1H), 5.85 (dt,  $J$  = 15.7, 7.5 Hz, 1H), 3.41 (d,  $J$  = 1.9 Hz, 2H), 3.14 (d,  $J$  = 7.6 Hz, 2H); **<sup>13</sup>C NMR** (100 MHz, CDCl<sub>3</sub>)  $\delta$  175.18, 158.48, 137.47, 136.68, 134.70, 134.63, 131.75, 130.33, 129.22, 128.97, 128.70, 128.36, 128.10, 127.47, 127.17, 126.51, 126.29, 125.54, 122.16, 119.99, 61.43, 42.48, 40.09; **HRMS** Calculated for C<sub>31</sub>H<sub>27</sub>N<sub>2</sub>O [M+H]<sup>+</sup> 443.2118, found 443.2114; **HPLC**: Chiracel AD-H column, 254 nm, 30 °C, *n*-hexane/*i*-propanol = 70/30, flow = 1.0 mL/min, retention time 6.8 min (maj) and 10.0 min.

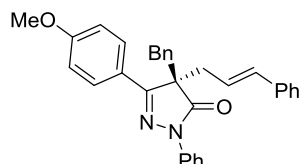

**(*R,E*)-4-benzyl-4-cinnamyl-5-(4-methoxyphenyl)-2-phenyl-2,4-dihydro-3H-pyrazol-3-one (3b)**: Prepared according to the general procedure, yellow oil, 84% yield, 91:9 er, [ $\alpha$ ]<sub>D</sub><sup>20</sup> = -28.8 (*c* 1.00, CHCl<sub>3</sub>), *R*<sub>f</sub> = 0.35 (PE/EA = 10:1). **<sup>1</sup>H NMR** (400 MHz, CDCl<sub>3</sub>)  $\delta$  7.90 (d,  $J$  = 8.7 Hz, 2H), 7.68 – 7.60 (m, 2H), 7.30 (t,  $J$  = 7.8 Hz, 2H), 7.20 – 7.07 (m, 6H), 7.07 – 6.97 (m, 5H), 6.96 – 6.89 (m, 2H), 6.40 (d,  $J$  = 15.7 Hz, 1H), 5.85 (dt,  $J$  = 15.7, 7.5 Hz, 1H), 3.90 (s, 3H), 3.39 (d,  $J$  = 7.7 Hz, 2H), 3.11 (d,  $J$  = 7.5 Hz, 2H); **<sup>13</sup>C NMR** (100 MHz, CDCl<sub>3</sub>)  $\delta$  175.01, 161.17, 158.22, 137.57, 136.74, 134.74, 134.57, 129.25, 128.66, 128.35, 128.08, 127.43, 127.12, 126.30, 125.38, 124.45, 122.33, 119.94, 114.35, 61.36, 55.42, 42.53, 40.12; **HRMS** Calculated for C<sub>32</sub>H<sub>29</sub>N<sub>2</sub>O<sub>2</sub> [M+H]<sup>+</sup> 473.2224, found 473.2223; **HPLC**: Chiracel AD-H column, 254 nm, 30 °C, *n*-hexane/*i*-propanol = 70/30, flow = 1.0 mL/min, retention time 9.1 min (maj) and 15.4 min.

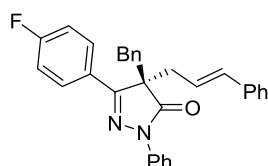

**(*R,E*)-4-benzyl-4-cinnamyl-5-(4-fluorophenyl)-2-phenyl-2,4-dihydro-3H-pyrazol-3-one (3c)**: Prepared according to the general procedure, yellow oil, 88% yield, 89:11 er, [ $\alpha$ ]<sub>D</sub><sup>20</sup> = -13.0 (*c* 1.00, CHCl<sub>3</sub>), *R*<sub>f</sub> = 0.34 (PE/EA = 10:1). **<sup>1</sup>H NMR** (400 MHz, CDCl<sub>3</sub>)  $\delta$  7.91 (td,  $J$  = 7.8, 1.7 Hz, 1H), 7.65 – 7.63 (m, 2H), 7.51 – 7.43 (m, 1H), 7.32 (t,  $J$  = 7.8 Hz, 2H), 7.28 – 7.20 (m, 2H), 7.19 – 7.00 (m, 9H), 6.95 – 6.92 (m, 2H), 6.36 (d,  $J$  = 15.7 Hz, 1H), 5.86 (dt,  $J$  = 15.7, 7.5 Hz, 1H), 3.47 (d,  $J$  = 13.5 Hz, 1H), 3.34 (dd,  $J$  = 13.5, 2.2 Hz, 1H), 3.18 (dd,  $J$  = 13.8, 7.5 Hz, 1H), 3.04 – 2.97 (m, 1H); **<sup>13</sup>C NMR** (100 MHz, CDCl<sub>3</sub>)  $\delta$  175.36, 159.82 (d,  $J$  = 250.3 Hz), 156.29 (d,  $J$  = 3.1 Hz), 137.37, 136.81, 135.12, 134.51, 132.01 (d,  $J$  = 8.8 Hz), 129.82 (d,  $J$  = 3.8 Hz), 129.20, 128.74, 128.35, 128.10, 127.39, 127.06, 126.25, 125.65, 124.74 (d,  $J$  = 3.0 Hz), 122.69, 119.94, 119.82 (d,  $J$  = 12.3 Hz), 116.92 (d,  $J$  = 23.7 Hz), 62.15, 41.49 (d,  $J$  = 6.8 Hz), 39.23 (d,  $J$  = 7.8 Hz); **<sup>19</sup>F NMR** (375 MHz, CDCl<sub>3</sub>)  $\delta$  -108.35; **HRMS** Calculated for C<sub>31</sub>H<sub>26</sub>N<sub>2</sub>FO [M+H]<sup>+</sup> 461.2024, found 461.2019; **HPLC**: Chiracel AD-H column, 254 nm, 30 °C, *n*-hexane/*i*-propanol = 70/30, flow = 1.0 mL/min, retention time 7.1 min (maj) and 11.6 min.

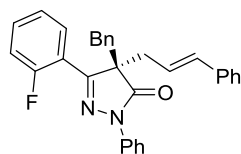

**(*R,E*)-4-benzyl-4-cinnamyl-5-(2-fluorophenyl)-2-phenyl-2,4-dihydro-3H-pyrazol-3-one (3d)**: Prepared according to the general procedure, yellow oil, 84% yield, 90:10 er, [ $\alpha$ ]<sub>D</sub><sup>20</sup> = -13.2 (*c* 1.00, CHCl<sub>3</sub>), *R*<sub>f</sub> = 0.51 (PE/EA = 10:1). **<sup>1</sup>H NMR** (400 MHz, CDCl<sub>3</sub>)  $\delta$  7.91 (td,  $J$  = 7.8, 1.7 Hz, 1H), 7.66 – 7.62 (m, 2H), 7.50 – 7.44 (m, 1H), 7.32 (t,  $J$  = 7.8 Hz, 2H), 7.28 – 7.08 (m, 8H), 7.06 – 7.00 (m, 3H), 6.93 (dd,  $J$  = 7.4, 2.0 Hz, 2H), 6.36 (d,  $J$  = 15.7 Hz, 1H), 5.86 (dt,  $J$  = 15.7, 7.5 Hz, 1H), 3.47 (d,  $J$  = 13.5 Hz, 1H), 3.34 (dd,  $J$  = 13.5, 2.2 Hz, 1H), 3.18 (dd,  $J$  = 13.8, 7.5 Hz, 1H),

3.04 – 2.97 (m, 1H);  $^{13}\text{C}$  NMR (100 MHz,  $\text{CDCl}_3$ )  $\delta$  175.36, 159.82 (d,  $J$  = 252.0 Hz), 156.29 (d,  $J$  = 3.1 Hz), 137.37, 136.81, 135.12, 134.51, 132.01 (d,  $J$  = 8.9 Hz), 129.82 (d,  $J$  = 3.8 Hz), 129.20, 128.74, 128.35, 128.10, 127.39, 127.06, 126.25, 125.65, 124.74 (d,  $J$  = 3.0 Hz), 122.69, 119.94, 119.82 (d,  $J$  = 12.3 Hz), 116.92 (d,  $J$  = 23.7 Hz), 62.15, 41.49 (d,  $J$  = 6.8 Hz), 39.23 (d,  $J$  = 7.8 Hz);  $^{19}\text{F}$  NMR (375 MHz,  $\text{CDCl}_3$ )  $\delta$  -108.35; HRMS Calculated for  $\text{C}_{31}\text{H}_{26}\text{N}_2\text{FO}$   $[\text{M}+\text{H}]^+$  461.2024, found 461.2026; HPLC: Chiracel AD-H column, 254 nm, 30 °C, *n*-hexane/*i*-propanol = 70/30, flow = 1.0 mL/min, retention time 6.8 min (maj) and 10.7 min.

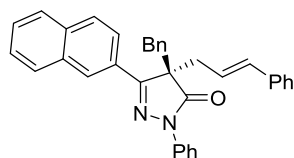

**(*R,E*)-4-benzyl-4-cinnamyl-5-(naphthalen-2-yl)-2-phenyl-2,4-dihydro-3H-pyrazol-3-one (3e):** Prepared according to the general procedure, white solid, melting point: 55 – 57 °C, 63% yield, 91:9 er,  $[\alpha]_D^{20}$  = -31.6 (c 0.50,  $\text{CHCl}_3$ ),  $R_f$  = 0.37 (PE/EA = 10:1).  $^1\text{H}$  NMR

(400 MHz,  $\text{CDCl}_3$ )  $\delta$  8.38 (s, 1H), 8.11 (dd,  $J$  = 8.7, 1.8 Hz, 1H), 7.99 – 7.89 (m, 3H), 7.68 – 7.64 (m, 2H), 7.61 – 7.57 (m, 2H), 7.35 – 7.30 (m, 2H), 7.18 – 6.98 (m, 9H), 6.95 – 6.91 (m, 2H), 6.42 (d,  $J$  = 15.7 Hz, 1H), 5.88 (dt,  $J$  = 15.7, 7.7 Hz, 1H), 3.52 (d,  $J$  = 13.4 Hz, 2H), 3.29 (ddd,  $J$  = 13.8, 7.1, 1.3 Hz, 1H), 3.20 (ddd,  $J$  = 13.9, 8.0, 1.2 Hz, 1H);  $^{13}\text{C}$  NMR (100 MHz,  $\text{CDCl}_3$ )  $\delta$  175.25, 158.28, 137.46, 136.64, 134.77, 134.63, 134.14, 133.07, 129.33, 129.26, 128.85, 128.79, 128.73, 128.34, 128.13, 127.92, 127.46, 127.19, 126.84, 126.29, 126.25, 125.63, 123.63, 122.20, 120.11, 61.54, 42.76, 40.29; HRMS Calculated for  $\text{C}_{35}\text{H}_{29}\text{N}_2\text{O}$   $[\text{M}+\text{H}]^+$  493.2274, found 493.2274; HPLC: Chiracel AD-H column, 254 nm, 30 °C, *n*-hexane/*i*-propanol = 70/30, flow = 1.0 mL/min, retention time 7.5 min (maj) and 12.3 min.

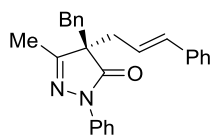

**(*R,E*)-4-benzyl-4-cinnamyl-5-methyl-2-phenyl-2,4-dihydro-3H-pyrazol-3-one (3f):** Prepared according to the general procedure, yellow oil, known product,<sup>4</sup> 78% yield, 87:13 er,  $[\alpha]_D^{20}$  = -3.4 (c 0.56,  $\text{CHCl}_3$ ) [lit.<sup>3a</sup>:  $[\alpha]_D^{20}$  = -5.2 (c 0.69,  $\text{CHCl}_3$ ) for 94% ee],  $R_f$  = 0.41 (PE/EA = 10:1).  $^1\text{H}$  NMR (400

MHz,  $\text{CDCl}_3$ )  $\delta$  7.61 – 7.57 (m, 2H), 7.32 – 7.28 (m, 2H), 7.25 – 7.21 (m, 4H), 7.20 – 7.10 (m, 7H), 6.52 (d,  $J$  = 15.7 Hz, 1H), 5.93 – 5.85 (m, 1H), 3.30 (d,  $J$  = 13.6 Hz, 1H), 2.97 – 2.88 (m, 2H), 2.66 (ddd,  $J$  = 13.9, 8.0, 1.2 Hz, 1H), 2.16 (s, 3H);  $^{13}\text{C}$  NMR (100 MHz,  $\text{CDCl}_3$ )  $\delta$  174.62, 161.38, 137.54, 136.59, 134.81, 134.50, 128.98, 128.71, 128.51, 128.43, 127.65, 127.31, 126.33, 125.23, 122.19, 119.60, 61.02, 40.99, 38.67, 14.80; HPLC: Chiracel AD-H column, 254 nm, 30 °C, *n*-hexane/*i*-propanol = 70/30, flow = 1.0 mL/min, retention time 6.3 min (maj) and 8.6 min. The absolute configuration was assigned by comparing the optical rotation with the literature value<sup>3</sup>.

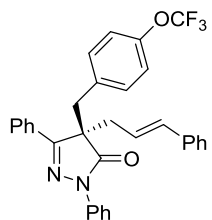

**(*R,E*)-4-cinnamyl-2,5-diphenyl-4-(4-(trifluoromethoxy)benzyl)-2,4-dihydro-3H-pyrazol-3-one (3g):** Prepared according to the general procedure, yellow oil, 89% yield, 91:9 er,  $[\alpha]_D^{20}$  = -17.6 (c 0.90,  $\text{CHCl}_3$ ),  $R_f$  = 0.39 (PE/EA = 10:1).  $^1\text{H}$  NMR (400 MHz,  $\text{CDCl}_3$ )  $\delta$  7.91 – 7.93 (m, 2H), 7.62 – 7.55 (m, 2H), 7.54 – 7.47 (m, 3H), 7.32 (t,  $J$  = 7.8 Hz, 2H), 7.22 – 7.07 (m, 6H), 6.90 (q,  $J$  = 8.6 Hz, 4H), 6.41 (d,  $J$  = 15.7 Hz, 1H), 5.85 (dt,  $J$  = 15.7,

7.5 Hz, 1H), 3.40 (s, 2H), 3.14 (d,  $J$  = 7.4 Hz, 2H).  $^{13}\text{C}$  NMR (100 MHz,  $\text{CDCl}_3$ )  $\delta$  174.90, 158.19, 148.33, 148.31, 137.25, 136.58, 134.89, 133.39, 131.55, 130.68, 130.53, 129.11, 128.77, 128.39, 127.56, 126.40, 126.30, 125.78, 121.88, 120.54, 120.32 (q,  $J$  = 255.5 Hz), 120.04, 61.31, 41.58, 39.95;  $^{19}\text{F}$  NMR (375 MHz,  $\text{CDCl}_3$ )  $\delta$  -57.92; HRMS Calculated for  $\text{C}_{32}\text{H}_{26}\text{N}_2\text{F}_3\text{O}_2$   $[\text{M}+\text{H}]^+$

527.1941, found 527.1941; **HPLC**: Chiracel OD-H column, 254 nm, 30 °C, *n*-hexane/*i*-propanol = 85/15, flow = 1.0 mL/min, retention time 6.8 min and 7.3 min (maj).

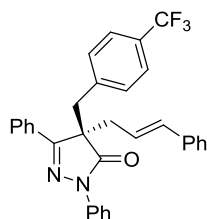

**(*R,E*)-4-cinnamyl-2,5-diphenyl-4-(4-(trifluoromethyl)benzyl)-2,4-dihydro-3H-pyrazol-3-one (3h)**: Prepared according to the general procedure, colorless oil, 85% yield, 91:9 er,  $[\alpha]_D^{20} = -16.1$  (*c* 0.98, CHCl<sub>3</sub>), *R*<sub>f</sub> = 0.43 (PE/EA = 10:1). **<sup>1</sup>H NMR** (400 MHz, CDCl<sub>3</sub>) 7.97 – 7.93 (m, 2H), 7.63 – 7.59 (m, 2H), 7.54 – 7.50 (m, 3H), 7.34 – 7.28 (m, 4H), 7.19 – 7.10 (m, 6H), 7.02 (d, *J* = 8.0 Hz, 2H), 6.42 (d, *J* = 15.7 Hz, 1H), 5.85 (dt, *J* = 15.7, 7.5 Hz, 1H), 3.45 (s, 2H), 3.21 – 3.10 (m, 2H); **<sup>13</sup>C NMR** (100 MHz, CDCl<sub>3</sub>)  $\delta$  174.80, 158.09, 138.79, 138.77, 137.24, 136.54, 135.02, 131.45, 130.60, 129.63, 129.43 (q, *J* = 32.4 Hz), 129.14, 128.79, 128.40, 127.59, 126.40, 126.31, 125.80, 125.06 (q, *J* = 3.9, Hz), 123.99 (q, *J* = 270.5 Hz), 121.71, 119.95, 61.14, 41.92, 40.19; **<sup>19</sup>F NMR** (375 MHz, CDCl<sub>3</sub>)  $\delta$  -62.61; **HRMS** Calculated for C<sub>32</sub>H<sub>26</sub>N<sub>2</sub>F<sub>3</sub>O [M+H]<sup>+</sup> 511.1992, found 511.1992; **HPLC**: Chiracel OD-H column, 254 nm, 30 °C, *n*-hexane/*i*-propanol = 85/15, flow = 1.0 mL/min, retention time 7.5 min and 8.2 min (maj).

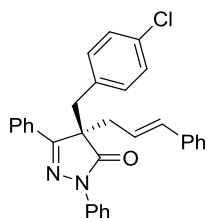

**(*R,E*)-4-(4-chlorobenzyl)-4-cinnamyl-2,5-diphenyl-2,4-dihydro-3H-pyrazol-3-one (3i)**: Prepared according to the general procedure, colorless oil, 70% yield, 91:9 er,  $[\alpha]_D^{20} = -21.9$  (*c* 0.72, CHCl<sub>3</sub>), *R*<sub>f</sub> = 0.44 (PE/EA = 10:1). **<sup>1</sup>H NMR** (400 MHz, CDCl<sub>3</sub>)  $\delta$  7.97 – 7.92 (m, 2H), 7.68 – 7.64 (m, 2H), 7.52 – 7.49 (m, 3H), 7.33 (t, *J* = 7.8 Hz, 2H), 7.19 – 7.09 (m, 6H), 7.00 (d, *J* = 8.3 Hz, 2H), 6.83 (d, *J* = 8.3 Hz, 2H), 6.40 (d, *J* = 15.6 Hz, 1H), 5.84 (dt, *J* = 15.4, 7.5 Hz, 1H), 3.37 (d, *J* = 3.7 Hz, 2H), 3.18 – 3.07 (m, 2H); **<sup>13</sup>C NMR** (100 MHz, CDCl<sub>3</sub>)  $\delta$  174.98, 158.23, 137.35, 136.59, 134.86, 133.18, 133.07, 131.55, 130.58, 130.50, 129.07, 128.78, 128.38, 128.29, 127.53, 126.42, 126.30, 125.67, 121.88, 119.88, 61.30, 41.62, 40.14. **HRMS** Calculated for C<sub>31</sub>H<sub>26</sub>N<sub>2</sub>ClO [M+H]<sup>+</sup> 477.1728, found 477.1731; **HPLC**: Chiracel AD-H column, 254 nm, 30 °C, *n*-hexane/*i*-propanol = 70/30, flow = 1.0 mL/min, retention time 8.9 min (maj) and 11.8 min.

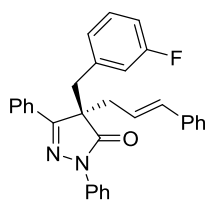

**(*R,E*)-4-cinnamyl-4-(3-fluorobenzyl)-2,5-diphenyl-2,4-dihydro-3H-pyrazol-3-one (3j)**: Prepared according to the general procedure, colorless oil, 91% yield, 91:9 er,  $[\alpha]_D^{20} = -18.4$  (*c* 0.86, CHCl<sub>3</sub>), *R*<sub>f</sub> = 0.35 (PE/EA = 10:1). **<sup>1</sup>H NMR** (400 MHz, CDCl<sub>3</sub>)  $\delta$  7.96 – 7.91 (m, 2H), 7.68 – 7.64 (m, 2H), 7.53 – 7.49 (m, 3H), 7.35 – 7.30 (m, 2H), 7.19 – 7.08 (m, 6H), 7.02–6.97 (m, 1H), 6.76 (tdd, *J* = 8.5, 2.6, 1.0 Hz, 1H), 6.71 (dt, *J* = 7.6, 1.2 Hz, 1H), 6.61 (dt, *J* = 9.9, 2.1 Hz, 1H), 6.41 (d, *J* = 15.7 Hz, 1H), 5.84 (dt, *J* = 15.7, 7.5 Hz, 1H), 3.39 (d, *J* = 4.5 Hz, 2H), 3.13 (dt, *J* = 7.8, 1.5 Hz, 2H); **<sup>13</sup>C NMR** (100 MHz, CDCl<sub>3</sub>)  $\delta$  174.92, 162.29 (d, *J* = 245.9 Hz), 158.28, 137.38, 137.11 (d, *J* = 7.4 Hz), 136.60, 134.90, 131.55, 130.51, 129.61 (d, *J* = 8.2 Hz), 129.08, 128.77, 128.38, 127.53, 126.43, 126.31, 125.65, 124.93 (d, *J* = 2.9 Hz), 121.86, 119.93, 116.19 (d, *J* = 21.6 Hz), 114.17 (d, *J* = 20.9 Hz), 61.19, 41.91 (d, *J* = 1.8 Hz), 40.15; **<sup>19</sup>F NMR** (375 MHz, CDCl<sub>3</sub>)  $\delta$  -113.21; **HRMS** Calculated for C<sub>31</sub>H<sub>26</sub>N<sub>2</sub>FO [M+H]<sup>+</sup> 461.2024, found 461.2029; **HPLC**: Chiracel AD-H column, 254 nm, 30 °C, *n*-hexane/*i*-propanol = 70/30, flow = 1.0 mL/min, retention time 7.4 min (maj) and 9.8 min.

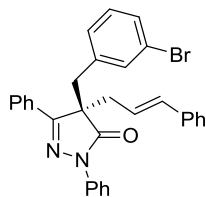

**(*R,E*)-4-(3-bromobenzyl)-4-cinnamyl-2,5-diphenyl-2,4-dihydro-3H-pyrazol-3-one (3k):** Prepared according to the general procedure, colorless oil, 86% yield, 90:10 er,  $[\alpha]^{20}_{\text{D}} = -12.8$  (*c* 1.00,  $\text{CHCl}_3$ ),  $R_f = 0.41$  (PE/EA = 10:1).  $^1\text{H NMR}$  (400 MHz,  $\text{CDCl}_3$ )  $\delta$  7.94 – 7.89 (m, 2H), 7.68 – 7.64 (m, 2H), 7.53 – 7.49 (m, 3H), 7.36 – 7.31 (m, 2H), 7.21 – 7.09 (m, 7H), 7.02 (t,  $J = 1.8$  Hz, 1H), 6.90 (t,  $J = 7.8$  Hz, 1H), 6.84 (dt,  $J = 7.7, 1.5$  Hz, 1H), 6.42 (d,  $J = 15.7$  Hz, 1H), 5.86 (dt,  $J = 15.7, 7.5$  Hz, 1H), 3.34 (d,  $J = 15.6$  Hz, 2H), 3.18 – 3.09 (m, 2H);  $^{13}\text{C NMR}$  (100 MHz,  $\text{CDCl}_3$ )  $\delta$  174.90, 158.32, 137.30, 136.91, 136.59, 134.89, 132.37, 131.57, 130.53, 130.33, 129.66, 129.10, 128.78, 128.38, 127.79, 127.55, 126.46, 126.31, 125.73, 122.01, 121.86, 120.09, 61.20, 41.80, 40.04; **HRMS** Calculated for  $\text{C}_{31}\text{H}_{26}\text{N}_2\text{BrO}$   $[\text{M}+\text{H}]^+$  521.1223, found 521.1228; **HPLC**: Chiracel AD-H column, 254 nm, 30 °C, *n*-hexane/*i*-propanol = 70/30, flow = 1.0 mL/min, retention time 8.1 min (maj) and 9.9 min.

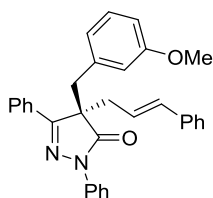

**(*R,E*)-4-cinnamyl-4-(3-methoxybenzyl)-2,5-diphenyl-2,4-dihydro-3H-pyrazol-3-one (3l):** Prepared according to the general procedure, colorless oil, 89% yield, 91:9 er,  $[\alpha]^{20}_{\text{D}} = -11.2$  (*c* 1.00,  $\text{CHCl}_3$ ),  $R_f = 0.39$  (PE/EA = 10:1).  $^1\text{H NMR}$  (400 MHz,  $\text{CDCl}_3$ )  $\delta$  7.97 – 7.93 (m, 2H), 7.71 – 7.67 (m, 2H), 7.52 – 7.47 (m, 3H), 7.35 – 7.29 (m, 2H), 7.19 – 7.09 (m, 6H), 6.95 – 6.91 (m, 1H), 6.60 (ddd,  $J = 8.3, 2.6, 1.0$  Hz, 1H), 6.52 (dt,  $J = 7.6, 1.2$  Hz, 1H), 6.43 – 6.38 (m, 2H), 5.85 (dt,  $J = 15.7, 7.5$  Hz, 1H), 3.44 – 3.34 (m, 5H), 3.18 – 3.08 (m, 2H);  $^{13}\text{C NMR}$  (100 MHz,  $\text{CDCl}_3$ )  $\delta$  175.27, 159.15, 158.52, 137.55, 136.67, 136.11, 134.73, 131.80, 130.32, 129.10, 128.95, 128.72, 128.37, 127.48, 126.51, 126.30, 125.50, 122.11, 121.51, 119.85, 113.77, 61.38, 54.81, 42.57, 40.18; **HRMS** Calculated for  $\text{C}_{32}\text{H}_{29}\text{N}_2\text{O}_2$   $[\text{M}+\text{H}]^+$  473.2224, found 473.2228; **HPLC**: Chiracel AD-H column, 254 nm, 30 °C, *n*-hexane/*i*-propanol = 70/30, flow = 1.0 mL/min, retention time 9.4 min (maj) and 11.3 min.

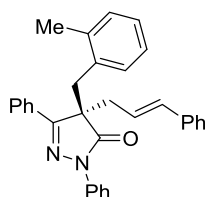

**(*R,E*)-4-cinnamyl-4-(2-methylbenzyl)-2,5-diphenyl-2,4-dihydro-3H-pyrazol-3-one (3m):** Prepared according to the general procedure, colorless oil, 85% yield, 90:10 er,  $[\alpha]^{20}_{\text{D}} = -8.0$  (*c* 0.74,  $\text{CHCl}_3$ ),  $R_f = 0.51$  (PE/EA = 10:1).  $^1\text{H NMR}$  (400 MHz,  $\text{CDCl}_3$ )  $\delta$  7.91 – 7.86 (m, 2H), 7.71 – 7.67 (m, 2H), 7.48 – 7.44 (m, 3H), 7.35 – 7.29 (m, 2H), 7.18 – 7.08 (m, 6H), 7.01 – 6.96 (m, 2H), 6.93 – 6.86 (m, 2H), 6.42 (d,  $J = 15.7$  Hz, 1H), 5.84 (dt,  $J = 15.7, 7.5$  Hz, 1H), 3.43 (d,  $J = 27.5$  Hz, 2H), 3.22 – 3.11 (m, 2H), 2.12 (s, 3H);  $^{13}\text{C NMR}$  (100 MHz,  $\text{CDCl}_3$ )  $\delta$  175.31, 159.01, 137.61, 136.73, 136.69, 134.86, 133.36, 131.85, 130.50, 130.31, 129.16, 128.93, 128.74, 128.36, 127.47, 127.07, 126.65, 126.30, 125.60, 125.48, 122.09, 119.88, 60.76, 40.63, 38.04, 19.88; **HRMS** Calculated for  $\text{C}_{32}\text{H}_{29}\text{N}_2\text{O}$   $[\text{M}+\text{H}]^+$  457.2274, found 457.2274; **HPLC**: Chiracel AD-H column, 254 nm, 30 °C, *n*-hexane/*i*-propanol = 70/30, flow = 1.0 mL/min, retention time 6.8 min (maj) and 7.6 min.

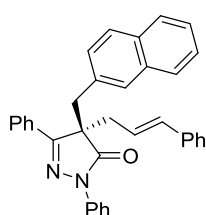

**(*R,E*)-4-cinnamyl-4-(naphthalen-2-ylmethyl)-2,5-diphenyl-2,4-dihydro-3H-pyrazol-3-one (3n):** Prepared according to the general procedure, colorless oil, 89% yield, 91:9 er,  $[\alpha]^{20}_{\text{D}} = -15.8$  (*c* 1.00,  $\text{CHCl}_3$ ),  $R_f = 0.31$  (PE/EA = 10:1).  $^1\text{H NMR}$  (400 MHz,  $\text{CDCl}_3$ )  $\delta$  7.95 – 7.92 (m, 2H), 7.66 – 7.58 (m,

3H), 7.53 – 7.47 (m, 5H), 7.36 – 7.22 (m, 5H), 7.19 – 7.03 (m, 7H), 6.44 (d,  $J = 15.7$  Hz, 1H), 5.88 (dt,  $J = 15.7, 7.5$  Hz, 1H), 3.56 (d,  $J = 16.4$  Hz, 2H), 3.19 (d,  $J = 7.5$  Hz, 2H);  $^{13}\text{C}$  NMR (100 MHz,  $\text{CDCl}_3$ )  $\delta$  175.29, 158.64, 137.42, 136.69, 134.78, 133.07, 132.42, 132.29, 131.83, 130.37, 128.98, 128.67, 128.38, 128.22, 127.72, 127.66, 127.49, 127.46, 127.28, 126.61, 126.32, 125.82, 125.62, 125.53, 122.11, 120.00, 61.49, 42.52, 40.33; **HRMS** Calculated for  $\text{C}_{35}\text{H}_{29}\text{N}_2\text{O}$   $[\text{M}+\text{H}]^+$  493.2274, found 493.2279; **HPLC**: Chiracel AD-H column, 254 nm, 30 °C, *n*-hexane/*i*-propanol = 70/30, flow = 1.0 mL/min, retention time 8.6 min (maj) and 12.2 min.

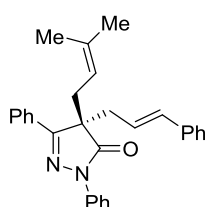

**(*R,E*)-4-cinnamyl-4-(3-methylbut-2-en-1-yl)-2,5-diphenyl-2,4-dihydro-3H-pyrazol-3-one (3o):**

Prepared according to the general procedure, colorless oil, 52% yield, 92:8 er,  $[\alpha]_{\text{D}}^{20} = -0.7$  ( $c$  0.42,  $\text{CHCl}_3$ ),  $R_f = 0.62$  (PE/EA = 10:1).  $^1\text{H}$  NMR (400 MHz,  $\text{CDCl}_3$ )  $\delta$  7.93 – 7.90 (m, 4H), 7.49 – 7.45 (m, 3H), 7.42 – 7.36 (m, 2H), 7.21 – 7.08 (m, 6H), 6.34 (d,  $J = 15.7$  Hz, 1H), 5.83 (dt,  $J = 15.7, 7.5$  Hz, 1H), 4.83 – 4.79 (m, 1H), 2.96 (dd,  $J = 7.5, 1.5$  Hz, 2H), 2.88 (dd,  $J = 14.6, 7.7$  Hz, 1H), 2.76 (dd,  $J = 14.5, 7.1$  Hz, 1H), 1.51 (d,  $J = 1.4$  Hz, 3H), 1.47 (d,  $J = 1.3$  Hz, 3H);  $^{13}\text{C}$  NMR (100 MHz,  $\text{CDCl}_3$ )  $\delta$  175.67, 159.46, 137.92, 136.75, 136.52, 134.46, 131.58, 130.24, 128.86, 128.81, 128.34, 127.40, 126.54, 126.27, 125.27, 122.40, 119.49, 116.30, 60.09, 39.78, 35.24, 25.77, 18.04; **HRMS** Calculated for  $\text{C}_{29}\text{H}_{29}\text{N}_2\text{O}$   $[\text{M}+\text{H}]^+$  421.2274, found 421.2276; **HPLC**: Chiracel AD-H column, 254 nm, 30 °C, *n*-hexane/*i*-propanol = 85/15, flow = 1.0 mL/min, retention time 7.5 min (maj) and 8.6 min.

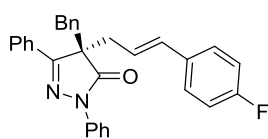

**(*R,E*)-4-benzyl-4-(3-(4-fluorophenyl)allyl)-2,5-diphenyl-2,4-dihydro-3H-pyrazol-3-one (3p):**

Prepared according to the general procedure, colorless oil, 74% yield, 91:9 er,  $[\alpha]_{\text{D}}^{20} = -14.4$  ( $c$  1.00,  $\text{CHCl}_3$ ),  $R_f = 0.35$  (PE/EA = 10:1).  $^1\text{H}$  NMR (400 MHz,  $\text{CDCl}_3$ )  $\delta$  7.97 – 7.93 (m, 2H), 7.65 – 7.61 (m, 2H), 7.52 – 7.48 (m, 3H), 7.34 – 7.28 (m, 2H), 7.17 – 7.12 (m, 1H), 7.08 – 7.00 (m, 5H), 6.93 – 6.89 (m, 2H), 6.87 – 6.81 (m, 2H), 6.35 (d,  $J = 15.7$  Hz, 1H), 5.76 (dt,  $J = 15.6, 7.5$  Hz, 1H), 3.41 (d,  $J = 2.2$  Hz, 2H), 3.13 – 3.10 (m, 2H);  $^{13}\text{C}$  NMR (100 MHz,  $\text{CDCl}_3$ )  $\delta$  175.15, 162.22 (d,  $J = 246.7$  Hz), 158.45, 137.44, 134.59, 133.53, 132.81 (d,  $J = 3.3$  Hz), 131.72, 130.37, 129.20, 129.00, 128.72, 128.11, 127.79 (d,  $J = 8.0$  Hz), 127.19, 126.48, 125.57, 121.90 (d,  $J = 2.2$  Hz), 119.94, 115.26 (d,  $J = 21.6$  Hz), 61.44, 42.43, 40.00;  $^{19}\text{F}$  NMR (375 MHz,  $\text{CDCl}_3$ )  $\delta$  -114.56; **HRMS** Calculated for  $\text{C}_{31}\text{H}_{26}\text{N}_2\text{FO}$   $[\text{M}+\text{H}]^+$  461.2024, found 461.2025; **HPLC**: Chiracel AD-H column, 254 nm, 30 °C, *n*-hexane/*i*-propanol = 70/30, flow = 1.0 mL/min, retention time 7.2 min (maj) and 13.5 min.

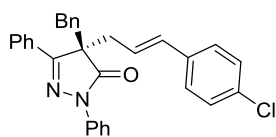

**(*R,E*)-4-benzyl-4-(3-(4-chlorophenyl)allyl)-2,5-diphenyl-2,4-dihydro-3H-pyrazol-3-one (3q):**

Prepared according to the general procedure, white solid, melting point: 49 – 51 °C, 79% yield, 91:9 er,  $[\alpha]_{\text{D}}^{20} = -13.1$  ( $c$  1.00,  $\text{CHCl}_3$ ),  $R_f = 0.50$  (PE/EA = 10:1).  $^1\text{H}$  NMR (400 MHz,  $\text{CDCl}_3$ )  $\delta$  7.95 (dd,  $J = 6.7, 3.0$  Hz, 2H), 7.63 (d,  $J = 8.0$  Hz, 2H), 7.51 – 7.49 (m, 3H), 7.31 (t,  $J = 7.8$  Hz, 2H), 7.17 – 7.11 (m, 3H), 7.08 – 7.00 (m, 5H), 6.93 – 6.89 (m, 2H), 6.34 (d,  $J = 15.7$  Hz, 1H), 5.82 (dt,  $J = 15.7, 7.5$  Hz, 1H), 3.41 (s, 2H), 3.14 – 3.11 (m, 2H);  $^{13}\text{C}$  NMR (100 MHz,  $\text{CDCl}_3$ )  $\delta$  175.09, 158.40, 137.41, 135.11, 134.54, 133.52, 133.13, 131.68, 130.40, 129.20, 129.01, 128.73, 128.53, 128.12, 127.48, 127.21, 126.47, 125.60, 122.88, 119.93, 61.38, 42.43, 39.99;

**HRMS** Calculated for  $C_{31}H_{26}N_2ClO$   $[M+H]^+$  477.1728, found 477.1725; **HPLC**: Chiracel AD-H column, 254 nm, 30 °C, *n*-hexane/*i*-propanol = 70/30, flow = 1.0 mL/min, retention time 7.6 min (maj) and 14.6 min.

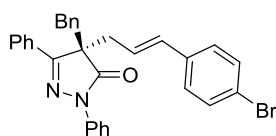

**(*R,E*)-4-benzyl-4-(3-(4-bromophenyl)allyl)-2,5-diphenyl-2,4-dihydro-3H-pyrazol-3-one (3r)**: Prepared according to the general procedure, colorless oil, 77% yield, 92:8 er,  $[\alpha]^{20}_D = -11.1$  (*c* 1.00,  $CHCl_3$ ),  $R_f = 0.45$  (PE/EA = 10:1).  **$^1H$  NMR** (400 MHz,  $CDCl_3$ )  $\delta$  7.95 – 7.93(m, 2H), 7.64 – 7.61 (m, 2H), 7.52 – 7.49 (m, 3H), 7.33 – 7.24 (m, 4H), 7.15 (t, *J* = 7.4 Hz, 1H), 7.08 – 7.00 (m, 3H), 6.97 – 6.90 (m, 4H), 6.32 (d, *J* = 15.7 Hz, 1H), 5.83 (dt, *J* = 15.7, 7.5 Hz, 1H), 3.41 (s, 2H), 3.11 (d, *J* = 7.5 Hz, 2H);  **$^{13}C$  NMR** (100 MHz,  $CDCl_3$ )  $\delta$  175.08, 158.39, 137.41, 135.55, 134.53, 133.58, 131.68, 131.47, 130.40, 129.20, 129.01, 128.74, 128.13, 127.81, 127.21, 126.46, 125.61, 123.03, 121.29, 119.93, 61.34, 42.43, 39.99; **HRMS** Calculated for  $C_{31}H_{26}N_2BrO$   $[M+H]^+$  521.1223, found 521.1229; **HPLC**: Chiracel AD-H column, 254 nm, 30 °C, *n*-hexane/*i*-propanol = 70/30, flow = 1.0 mL/min, retention time 8.0 min (maj) and 15.6 min.

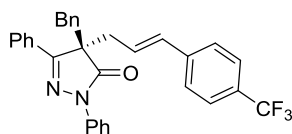

**(*R,E*)-4-benzyl-2,5-diphenyl-4-(3-(4-(trifluoromethyl)phenyl)allyl)-2,4-dihydro-3H-pyrazol-3-one (3s)**: Prepared according to the general procedure, colorless oil, 53% yield, 92:8 er,  $[\alpha]^{20}_D = -11.5$  (*c* 1.00,  $CHCl_3$ ),  $R_f = 0.48$  (PE/EA = 10:1).  **$^1H$  NMR** (400 MHz,  $CDCl_3$ )  $\delta$  7.98 – 7.93 (m, 2H), 7.65 – 7.61 (m, 2H), 7.53 – 7.49 (m, 3H), 7.41 (d, *J* = 8.1 Hz, 2H), 7.32 (t, *J* = 7.8 Hz, 2H), 7.19 – 7.13 (m, 3H), 7.09 – 7.02 (m, 3H), 6.93 – 6.90 (m, 2H), 6.42 (d, *J* = 15.7 Hz, 1H), 5.94 (dt, *J* = 15.7, 7.5 Hz, 1H), 3.43 (s, 2H), 3.16 (d, *J* = 7.6 Hz, 2H);  **$^{13}C$  NMR** (100 MHz,  $CDCl_3$ )  $\delta$  175.01, 158.31, 140.03, 137.37, 134.44, 133.45, 131.62, 130.46, 129.30 (q, *J* = 32.1 Hz), 129.20, 129.04, 128.74, 128.14, 127.25, 126.44, 126.42, 125.63, 125.34 (q, *J* = 3.8 Hz), 125.02, 123.91 (q, *J* = 234.5 Hz), 119.87, 61.29, 42.46, 39.92;  **$^{19}F$  NMR** (375 MHz,  $CDCl_3$ )  $\delta$  -62.57; **HRMS** Calculated for  $C_{32}H_{26}N_2F_3O$   $[M+H]^+$  511.1992, found 511.1997; **HPLC**: Chiracel AD-H column, 254 nm, 30 °C, *n*-hexane/*i*-propanol = 70/30, flow = 1.0 mL/min, retention time 6.7 min (maj) and 13.0 min.

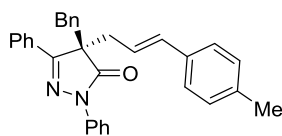

**(*R,E*)-4-benzyl-2,5-diphenyl-4-(3-(p-tolyl)allyl)-2,4-dihydro-3H-pyrazol-3-one (3t)**: Prepared according to the general procedure, colorless oil, 43% yield, 89:11 er,  $[\alpha]^{20}_D = -17.9$  (*c* 1.00,  $CHCl_3$ ),  $R_f = 0.42$  (PE/EA = 10:1).  **$^1H$  NMR** (400 MHz,  $CDCl_3$ )  $\delta$  7.97 – 7.92 (m, 2H), 7.65 – 7.61 (m, 2H), 7.53 – 7.47 (m, 3H), 7.33 – 7.28 (m, 2H), 7.17 – 7.12 (m, 1H), 7.08 – 6.95 (m, 7H), 6.93 – 6.89 (m, 2H), 6.36 (d, *J* = 15.7 Hz, 1H), 5.79 (dt, *J* = 15.7, 7.5 Hz, 1H), 3.41 (d, *J* = 1.8 Hz, 2H), 3.12 (d, *J* = 7.7 Hz, 2H), 2.24 (s, 3H);  **$^{13}C$  NMR** (100 MHz,  $CDCl_3$ )  $\delta$  175.21, 158.51, 137.48, 137.28, 134.67, 134.54, 133.91, 131.78, 130.28, 129.21, 129.04, 128.93, 128.68, 128.08, 127.13, 126.52, 126.19, 125.49, 121.06, 119.99, 61.48, 42.46, 40.14, 21.12; **HRMS** Calculated for  $C_{32}H_{29}N_2O$   $[M+H]^+$  457.2274, found 457.2277; **HPLC**: Chiracel AD-H column, 254 nm, 30 °C, *n*-hexane/*i*-propanol = 70/30, flow = 1.0 mL/min, retention time 6.8 min (maj) and 10.5 min.

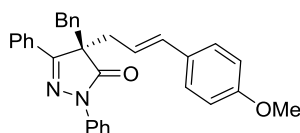

**(*R,E*)-4-benzyl-4-(3-(4-methoxyphenyl)allyl)-2,5-diphenyl-2,4-dihydro-3H-pyrazol-3-one (3u)**: Prepared according to the general

procedure, colorless oil, 39% yield, 88:12 er,  $[\alpha]_D^{15} = -10.0$  ( $c$  1.00,  $\text{CHCl}_3$ ),  $R_f = 0.38$  (PE/EA = 10:1).  **$^1\text{H}$  NMR** (400 MHz,  $\text{CDCl}_3$ )  $\delta$  7.97 – 7.93 (m, 2H), 7.65 – 7.62 (m, 2H), 7.51 – 7.49 (m, 3H), 7.31 (t,  $J = 7.8$  Hz, 2H), 7.17 – 7.12 (m, 1H), 7.08 – 7.00 (m, 5H), 6.91 (d,  $J = 7.2$  Hz, 2H), 6.70 (d,  $J = 8.6$  Hz, 2H), 6.34 (d,  $J = 15.6$  Hz, 1H), 5.71 (dt,  $J = 15.7, 7.5$  Hz, 1H), 3.72 (s, 2H), 3.40 (d,  $J = 2.2$  Hz, 2H), 3.11 (d,  $J = 7.3$  Hz, 3H);  **$^{13}\text{C}$  NMR** (100 MHz,  $\text{CDCl}_3$ )  $\delta$  175.24, 159.08, 158.54, 137.49, 134.70, 134.06, 131.80, 130.27, 129.51, 129.20, 128.93, 128.68, 128.08, 127.44, 127.12, 126.52, 125.49, 119.99, 119.86, 113.76, 61.55, 55.23, 42.42, 40.16; **HRMS** Calculated for  $\text{C}_{32}\text{H}_{29}\text{N}_2\text{O}_2$   $[\text{M}+\text{H}]^+$  473.2224, found 473.2222; **HPLC**: Chiracel AD-H column, 254 nm, 30 °C,  $n$ -hexane/ $i$ -propanol = 70/30, flow = 1.0 mL/min, retention time 9.2 min (maj) and 14.1 min.

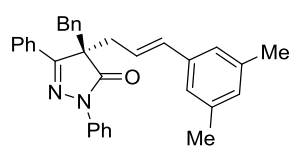

**(*R,E*)-4-benzyl-4-(3-(3,5-dimethylphenyl)allyl)-2,5-diphenyl-2,4-dihydro-3H-pyrazol-3-one (3v)**: Prepared according to the general procedure, colorless oil, 87% yield, 89:11 er,  $[\alpha]_D^{20} = -19.3$  ( $c$  0.82,  $\text{CHCl}_3$ ),  $R_f = 0.57$  (PE/EA = 10:1).  **$^1\text{H}$  NMR** (400 MHz,  $\text{CDCl}_3$ )  $\delta$

7.97 – 7.92 (m, 2H), 7.67 – 7.63 (m, 2H), 7.53 – 7.48 (m, 3H), 7.34 – 7.29 (m, 2H), 7.17 – 7.12 (m, 1H), 7.08 – 7.00 (m, 3H), 6.93 – 6.89 (m, 2H), 6.77 (s, 1H), 6.72 (s, 2H), 6.34 (d,  $J = 15.7$  Hz, 1H), 5.82 (dt,  $J = 15.7, 7.5$  Hz, 1H), 3.40 (d,  $J = 3.8$  Hz, 2H), 3.12 (d,  $J = 7.5$  Hz, 2H), 2.17 (s, 6H);  **$^{13}\text{C}$  NMR** (100 MHz,  $\text{CDCl}_3$ )  $\delta$  175.22, 158.53, 137.81, 137.52, 136.62, 134.92, 134.69, 131.80, 130.29, 129.23, 129.21, 128.94, 128.68, 128.09, 127.14, 126.56, 125.50, 124.21, 121.67, 120.00, 61.47, 42.43, 40.21, 21.14; **HRMS** Calculated for  $\text{C}_{33}\text{H}_{31}\text{N}_2\text{O}$   $[\text{M}+\text{H}]^+$  471.2431, found 471.2426; **HPLC**: Chiracel AD-H column, 254 nm, 30 °C,  $n$ -hexane/ $i$ -propanol = 70/30, flow = 1.0 mL/min, retention time 6.2 min (maj) and 9.3 min.

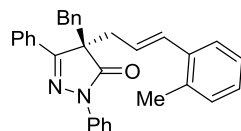

**(*R,E*)-4-benzyl-2,5-diphenyl-4-(3-(o-tolyl)allyl)-2,4-dihydro-3H-pyrazol-3-one (3w)**: Prepared according to the general procedure, colorless oil, 30% yield, 87:13 er,  $[\alpha]_D^{20} = -28.2$  ( $c$  0.56,  $\text{CHCl}_3$ ),  $R_f = 0.55$  (PE/EA = 10:1).  **$^1\text{H}$  NMR** (400 MHz,  $\text{CDCl}_3$ )  $\delta$  7.99 – 7.95 (m, 2H), 7.68 – 7.64 (m,

2H), 7.51 – 7.48 (m, 3H), 7.34 – 7.28 (m, 2H), 7.16 – 7.12 (m, 1H), 7.10 – 6.96 (m, 7H), 6.94 – 6.91 (m, 2H), 6.56 (d,  $J = 15.6$  Hz, 1H), 5.68 (dt,  $J = 15.6, 7.5$  Hz, 1H), 3.42 (s, 2H), 3.16 (dd,  $J = 7.6, 1.2$  Hz, 2H), 2.00 (s, 3H);  **$^{13}\text{C}$  NMR** (100 MHz,  $\text{CDCl}_3$ )  $\delta$  175.19, 158.42, 137.49, 136.12, 135.30, 134.62, 133.05, 131.75, 130.30, 129.90, 129.22, 128.94, 128.66, 128.10, 127.36, 127.16, 126.45, 125.98, 125.87, 125.43, 123.71, 119.77, 61.60, 42.58, 40.42, 19.43; **HRMS** Calculated for  $\text{C}_{32}\text{H}_{29}\text{N}_2\text{O}$   $[\text{M}+\text{H}]^+$  457.2274, found 457.2273; **HPLC**: Chiracel AD-H column, 254 nm, 30 °C,  $n$ -hexane/ $i$ -propanol = 70/30, flow = 1.0 mL/min, retention time 6.1 min (maj) and 8.1 min.

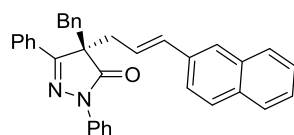

**(*R,E*)-4-benzyl-4-(3-(naphthalen-2-yl)allyl)-2,5-diphenyl-2,4-dihydro-3H-pyrazol-3-one (3x)**: Prepared according to the general procedure, colorless oil, 92% yield, 89:11 er,  $[\alpha]_D^{20} = -28.2$  ( $c$  1.00,  $\text{CHCl}_3$ ),  $R_f = 0.51$  (PE/EA = 10:1).  **$^1\text{H}$  NMR** (400 MHz,  $\text{CDCl}_3$ )  $\delta$

8.00 – 7.95 (m, 2H), 7.71 – 7.59 (m, 5H), 7.54 – 7.46 (m, 4H), 7.40 – 7.33 (m, 2H), 7.32 – 7.27 (m, 3H), 7.15 – 7.10 (m, 1H), 7.08 – 7.01 (m, 3H), 6.95 – 6.91 (m, 2H), 6.55 (d,  $J = 15.6$  Hz, 1H), 5.97 (dt,  $J = 15.6, 7.5$  Hz, 1H), 3.44 (d,  $J = 3.2$  Hz, 2H), 3.20 – 3.17 (m, 2H);  **$^{13}\text{C}$  NMR** (100 MHz,  $\text{CDCl}_3$ )  $\delta$  175.22, 158.52, 137.46, 134.83, 134.66, 134.11, 133.40, 132.89, 131.78, 130.37, 129.24, 129.01, 128.72, 128.13, 128.00, 127.91, 127.57, 127.19, 126.55, 126.15, 125.79, 125.58, 123.53,

122.52, 120.04, 61.50, 42.45, 40.24; **HRMS** Calculated for  $C_{35}H_{29}N_2O$   $[M+H]^+$  493.2274, found 493.2270; **HPLC**: Chiracel AD-H column, 254 nm, 30 °C, *n*-hexane/*i*-propanol = 70/30, flow = 1.0 mL/min, retention time 9.0 min (maj) and 13.7 min.

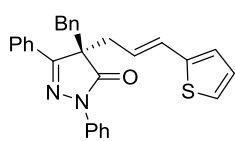

**(*R,E*)-4-benzyl-2,5-diphenyl-4-(3-(thiophen-2-yl)allyl)-2,4-dihydro-3H-pyrazol-3-one (3y)**: Prepared according to the general procedure, colorless oil, 25% yield, 90:10 er,  $[\alpha]_D^{20} = -37.6$  (*c* 0.42,  $CHCl_3$ ),  $R_f = 0.48$  (PE/EA = 10:1).  **$^1H$  NMR** (400 MHz,  $CDCl_3$ )  $\delta$  7.97 – 7.92 (m, 2H), 7.65 – 7.61 (m, 2H), 7.52 – 7.48 (m, 3H), 7.34 – 7.29 (m, 2H), 7.17 – 7.13 (m, 1H), 7.12 – 7.09 (m, 1H), 7.07 – 7.00 (m, 3H), 6.93 – 6.89 (m, 4H), 6.40 (d,  $J = 15.7$  Hz, 1H), 5.70 (dt,  $J = 15.7, 7.5$  Hz, 1H), 3.40 (d,  $J = 2.1$  Hz, 2H), 3.11 – 3.09 (m, 2H);  **$^{13}C$  NMR** (100 MHz,  $CDCl_3$ )  $\delta$  175.18, 158.45, 139.21, 137.45, 134.62, 131.73, 130.31, 129.20, 128.95, 128.78, 128.70, 128.08, 127.15, 126.49, 125.72, 125.54, 124.99, 121.97, 121.90, 119.99, 61.42, 42.44, 40.04; **HRMS** Calculated for  $C_{29}H_{25}N_2OS$   $[M+H]^+$  449.1682, found 449.1677; **HPLC**: Chiracel AD-H column, 254 nm, 30 °C, *n*-hexane/*i*-propanol = 70/30, flow = 1.0 mL/min, retention time 8.1 min (maj) and 11.8 min.

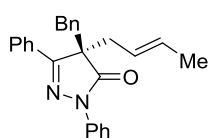

**(*R,E*)-4-benzyl-4-(but-2-en-1-yl)-2,5-diphenyl-2,4-dihydro-3H-pyrazol-3-one (3z)**: Prepared according to the general procedure, colorless oil, 15% yield, 54:46 er,  $R_f = 0.52$  (PE/EA = 10:1).  **$^1H$  NMR** (400 MHz,  $CDCl_3$ )  $\delta$  7.94 – 7.90 (m, 2H), 7.71 – 7.67 (m, 2H), 7.50 – 7.46 (m, 3H), 7.37 – 7.32 (m, 2H), 7.19 – 7.14 (m, 1H), 7.07 – 6.99 (m, 3H), 6.89 – 6.86 (m, 2H), 5.55 – 5.46 (m, 1H), 5.16 – 5.07 (m, 1H), 3.33 (d,  $J = 6.4$  Hz, 2H), 2.97 – 2.87 (m, 2H), 1.45 (dd,  $J = 6.5, 1.6$  Hz, 3H);  **$^{13}C$  NMR** (100 MHz,  $CDCl_3$ )  $\delta$  175.36, 158.63, 137.62, 134.83, 131.85, 130.67, 130.19, 129.19, 128.88, 128.71, 128.04, 127.05, 126.47, 125.40, 123.13, 119.82, 61.61, 42.32, 39.98, 17.82; **HRMS** Calculated for  $C_{26}H_{25}N_2O$   $[M+H]^+$  381.1961, found 381.1964; **HPLC**: Chiracel IE column, 254 nm, 30 °C, *n*-hexane/*i*-propanol = 80/20, flow = 1.0 mL/min, retention time 5.4 min (maj) and 5.8 min.

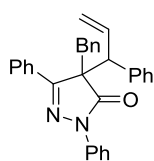

**4-benzyl-2,5-diphenyl-4-(1-phenylallyl)-2,4-dihydro-3H-pyrazol-3-one (4a)**: white solid, melting point: 50 – 52 °C,  $R_f = 0.71$  (PE/EA = 10:1).  **$^1H$  NMR** (400 MHz,  $CDCl_3$ )  $\delta$  7.92 – 7.87 (m, 2H), 7.50 – 7.46 (m, 3H), 7.43 – 7.39 (m, 2H), 7.32 – 7.27 (m, 2H), 7.17 – 7.12 (m, 1H), 7.05 – 6.97 (m, 7H), 6.91 – 6.86 (m, 2H), 5.40 – 5.35 (m, 2H), 4.14 (d,  $J = 10.0$  Hz, 1H), 3.69 (d,  $J = 13.8$  Hz, 1H), 3.44 (d,  $J = 13.8$  Hz, 1H);  **$^{13}C$  NMR** (100 MHz,  $CDCl_3$ )  $\delta$  174.50, 157.91, 138.49, 137.24, 134.97, 134.88, 132.00, 130.09, 129.26, 128.74, 128.60, 128.12, 128.10, 127.81, 127.31, 127.00, 126.76, 125.66, 120.40, 118.48, 63.88, 56.15, 41.54; **HRMS** Calculated for  $C_{31}H_{27}N_2O$   $[M+H]^+$  443.2118, found 443.2118.

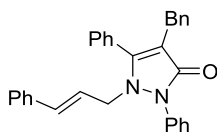

**4-benzyl-1-cinnamyl-2,5-diphenyl-1,2-dihydro-3H-pyrazol-3-one (5a)**: melting point: 78 – 80 °C,  $R_f = 0.25$  (PE/EA = 5:1).  **$^1H$  NMR** (400 MHz,  $CDCl_3$ )  $\delta$  7.67 – 7.63 (m, 2H), 7.52 – 7.46 (m, 7H), 7.31 – 7.23 (m, 4H), 7.19 (dd,  $J = 6.7, 2.8$  Hz, 2H), 7.14 – 7.09 (m, 5H), 5.97 (d,  $J = 15.8$  Hz, 1H), 5.73 (dt,  $J = 15.8, 6.9$  Hz, 1H), 4.06 (dd,  $J = 6.9, 1.0$  Hz, 2H), 3.74 (s, 2H);  **$^{13}C$  NMR** (100 MHz,  $CDCl_3$ )  $\delta$  166.27, 156.53, 140.08, 136.10, 135.87, 135.43, 130.16, 129.65,



129.18, 129.07, 129.06, 128.60, 128.45, 128.16, 128.08, 126.46, 126.12, 125.92, 123.22, 119.74, 114.50, 52.17, 28.54; **HRMS** Calculated for C<sub>31</sub>H<sub>27</sub>N<sub>2</sub>O [M+H]<sup>+</sup> 443.2118, found 443.2123.

## 5. Deuterium labeling and control experiments

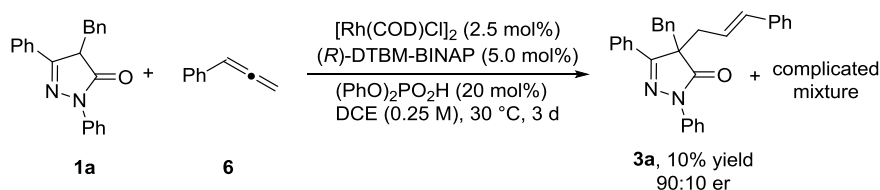

In glove box, a sealed tube was charged with **1a** (0.1 mmol, 1.0 equiv), [Rh(COD)Cl]<sub>2</sub> (0.0025 mmol, 2.5 mol%), (*R*)-DTBM-BINAP (0.005 mmol, 5 mol%), (PhO)<sub>2</sub>PO<sub>2</sub>H (0.02 mmol, 20 mol%) and DCE (0.4 mL) at room temperature. Then allene **6** (0.20 mmol, 2.0 equiv) was added and the reaction tube was sealed with a teflon screw cap, removed from the glove box and stirred at 35 °C for 3 days. After cooling to room temperature, the reaction mixture was concentrated in vacuo and detected with <sup>1</sup>H NMR analysis (with 1,3,5-trimethoxybenzene as internal standard) to determine product **3a** in 10% yield and 90:10 er. The enantioselectivity was determined by chiral HPLC.

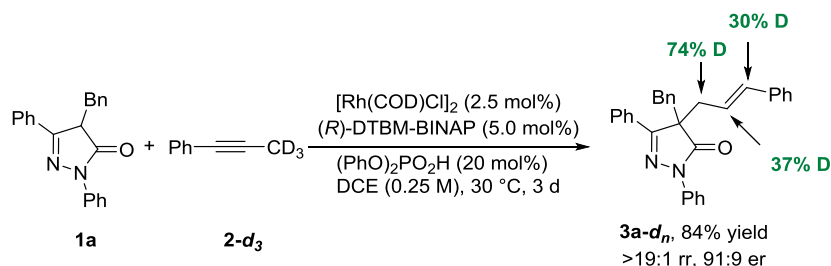

In glove box, a sealed tube was charged with **1a** (0.1 mmol, 1.0 equiv), [Rh(COD)Cl]<sub>2</sub> (0.0025 mmol, 2.5 mol%), (*R*)-DTBM-BINAP (0.005 mmol, 5 mol%), (PhO)<sub>2</sub>PO<sub>2</sub>H (0.02 mmol, 20 mol%) and DCE (0.4 mL) at room temperature. Then **2-d<sub>3</sub>** (0.20 mmol, 2.0 equiv) was added and the reaction tube was sealed with a teflon screw cap, removed from the glove box and stirred at 35 °C for 3 days. After cooling to room temperature, the reaction mixture was concentrated in vacuo and purified by flash chromatography on silica gel with petroleum ether and ethyl acetate (PE/EA = 20 :1) to afford **3a-d<sub>n</sub>** in 84% yield and 91:9 er. The enantioselectivity was determined by chiral HPLC.

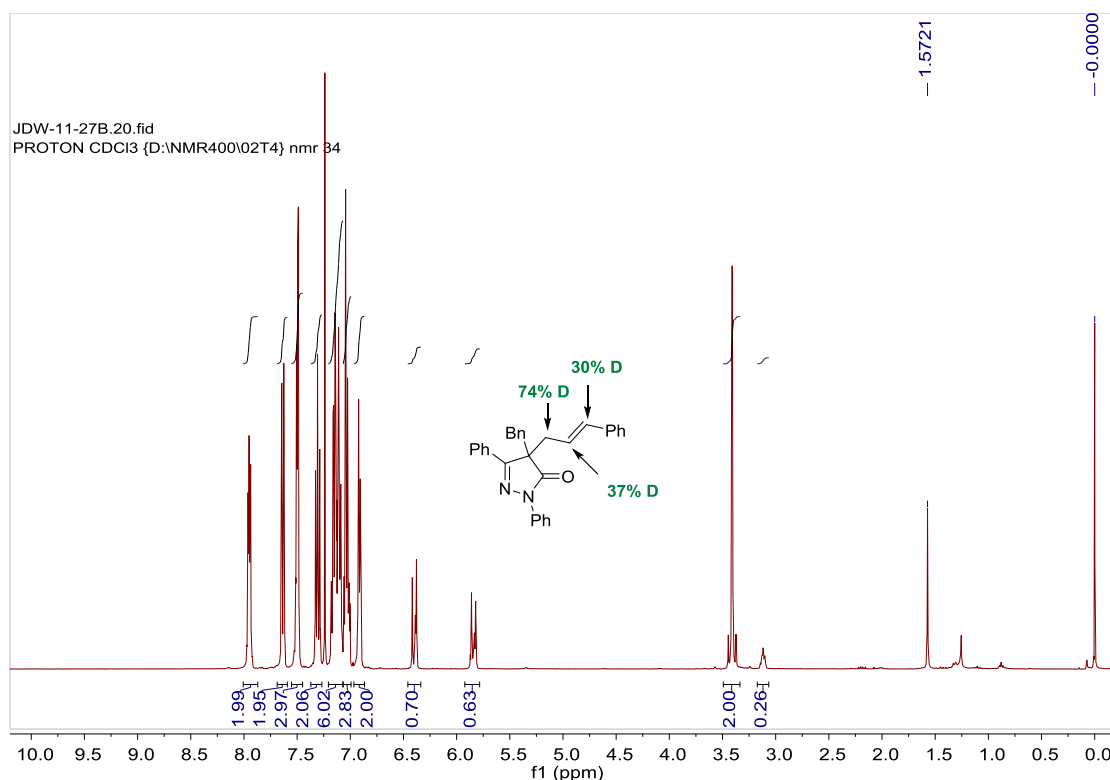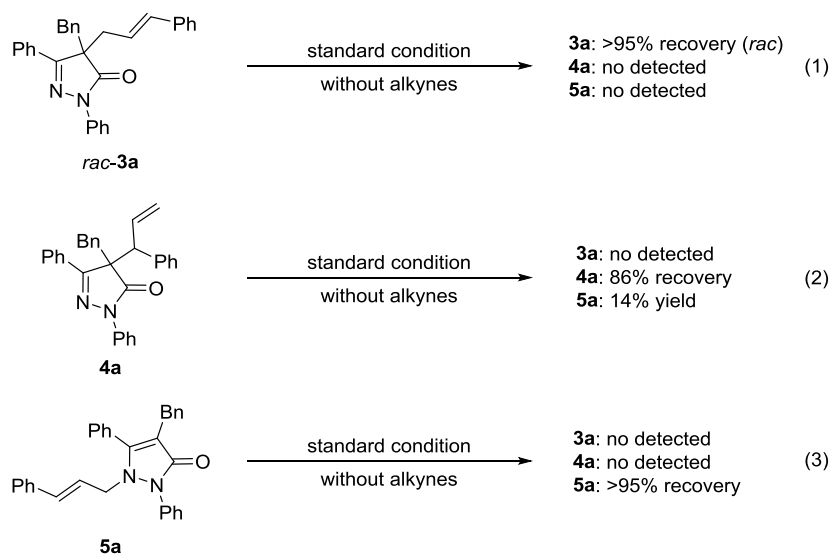

(1) In glove box, a sealed tube was charged with **rac-3a** (0.1 mmol, 1.0 equiv), [Rh(COD)Cl]<sub>2</sub> (0.0025 mmol, 2.5 mol%), (*R*)-DTBM-BINAP (0.005 mmol, 5 mol%), (PhO)<sub>2</sub>PO<sub>2</sub>H (0.02 mmol, 20 mol%) and DCE (0.4 mL) at room temperature. Then the reaction tube was sealed with a teflon screw cap, removed from the glove box and stirred at 35 °C for 3 days. After cooling to room temperature, the reaction mixture was concentrated in vacuo and detected with <sup>1</sup>HNMR analysis (with 1,3,5-trimethoxybenzene as internal standard) to determined racemate **3a** in more than 95% recovery yield. No **4a** or **5a** was detected.

(2) In glove box, a sealed tube was charged with **4a** (0.1 mmol, 1.0 equiv), [Rh(COD)Cl]<sub>2</sub> (0.0025 mmol, 2.5 mol%), (*R*)-DTBM-BINAP (0.005 mmol, 5 mol%), (PhO)<sub>2</sub>PO<sub>2</sub>H (0.02 mmol, 20 mol%) and DCE (0.4 mL) at room temperature. Then the reaction tube was sealed with a teflon

screw cap, removed from the glove box and stirred at 35 °C for 3 days. After cooling to room temperature, the reaction mixture was concentrated in vacuo and detected with <sup>1</sup>HNMR analysis (with 1,3,5-trimethoxybenzene as internal standard) to determined racemate **4a** and **5a** in recovery 86% and 14% yield, respectively. No **3a** was detected.

(3) In glove box, a sealed tube was charged with **5a** (0.1 mmol, 1.0 equiv), [Rh(COD)Cl]<sub>2</sub> (0.0025 mmol, 2.5 mol%), (*R*)-DTBM-BINAP (0.005 mmol, 5 mol%), (PhO)<sub>2</sub>PO<sub>2</sub>H (0.02 mmol, 20 mol%) and DCE (0.4 mL) at room temperature. Then the reaction tube was sealed with a teflon screw cap, removed from the glove box and stirred at 35 °C for 3 days. After cooling to room temperature, the reaction mixture was concentrated in vacuo and detected with <sup>1</sup>HNMR analysis (with 1,3,5-trimethoxybenzene as internal standard) to determined racemate **5a** in more than 95% recovery yield. No **3a** or **4a** was detected.

## 6. References

1. (a) Briones, J. F.; Davies, H. M. L. *Org. Lett.* **2011**, *13*, 3984. (b) Gao, S.; Wu, Z.; Fang, X.; Lin, A.; Yao, H. *Org. Lett.* **2016**, *18*, 3906.
2. (a) Kamlar, M.; Cisarova, I.; Vesely, J. *Org. Biomol. Chem.* **2015**, *13*, 2884. (b) Mao, S.; Geng, X.; Yang, Y.; Qian, X.; Wu, S.; Han, J.; Wang, L. *RSC Adv.* **2015**, *46*, 36390.
3. Hu, R.-B.; Wang, C. H.; Ren, W.; Liu, Z.; Yang, S. D. *ACS Catal.* **2017**, *7*, 7400.
4. (a) Tao, Z.-L.; Zhang, W.-Q.; Chen, D.-F.; Adele, A.; Gong, L.-Z. *J. Am. Chem. Soc.* **2013**, *135*, 9255. (b) Lin, H.-C.; Wang, P.-S.; Tao, Z.-L.; Chen, Y.-G.; Han, Z.-Y.; Gong, L.-Z. *J. Am. Chem. Soc.* **2016**, *138*, 14354.

## 7. Copy of NMR and HPLC for products

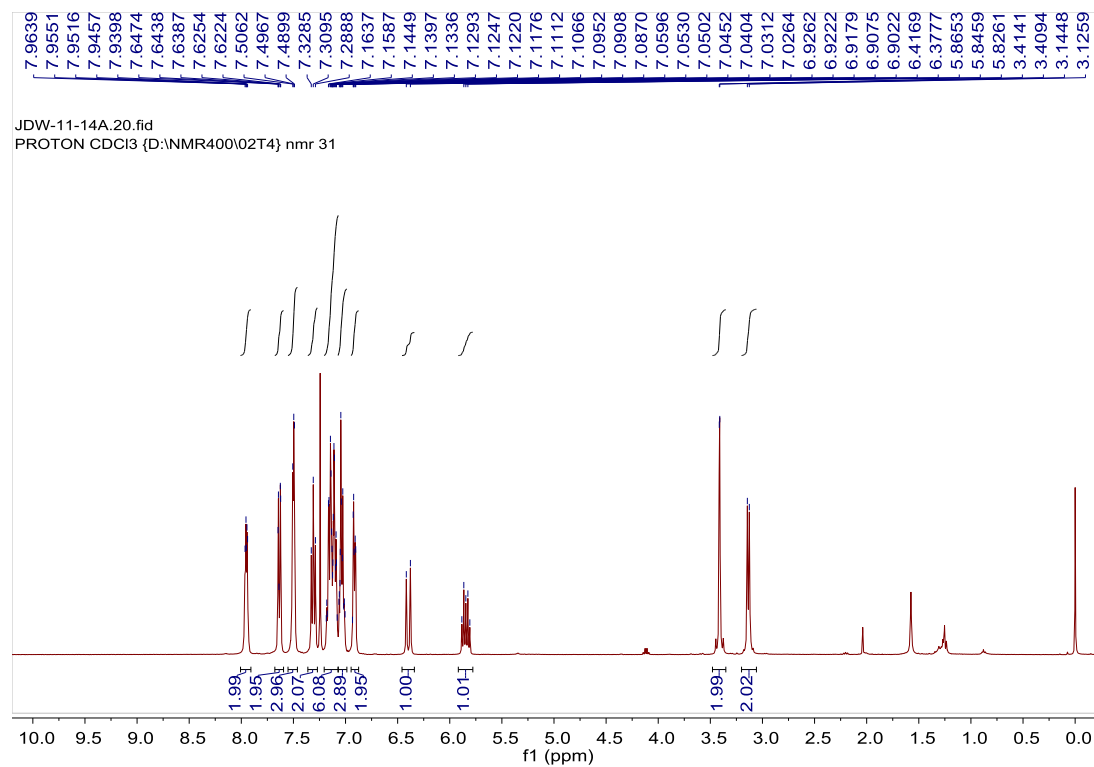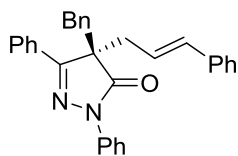

**3a** <sup>1</sup>H NMR (400 MHz, CDCl<sub>3</sub>)

<sup>13</sup>C NMR (100 MHz, CDCl<sub>3</sub>)

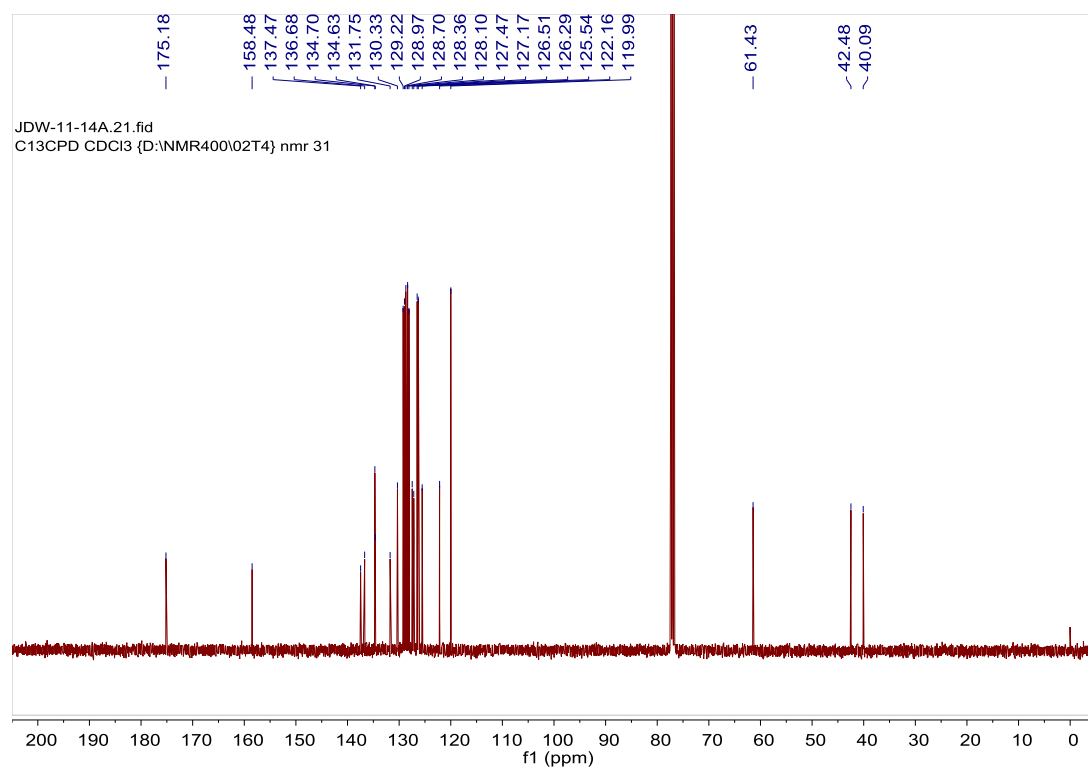

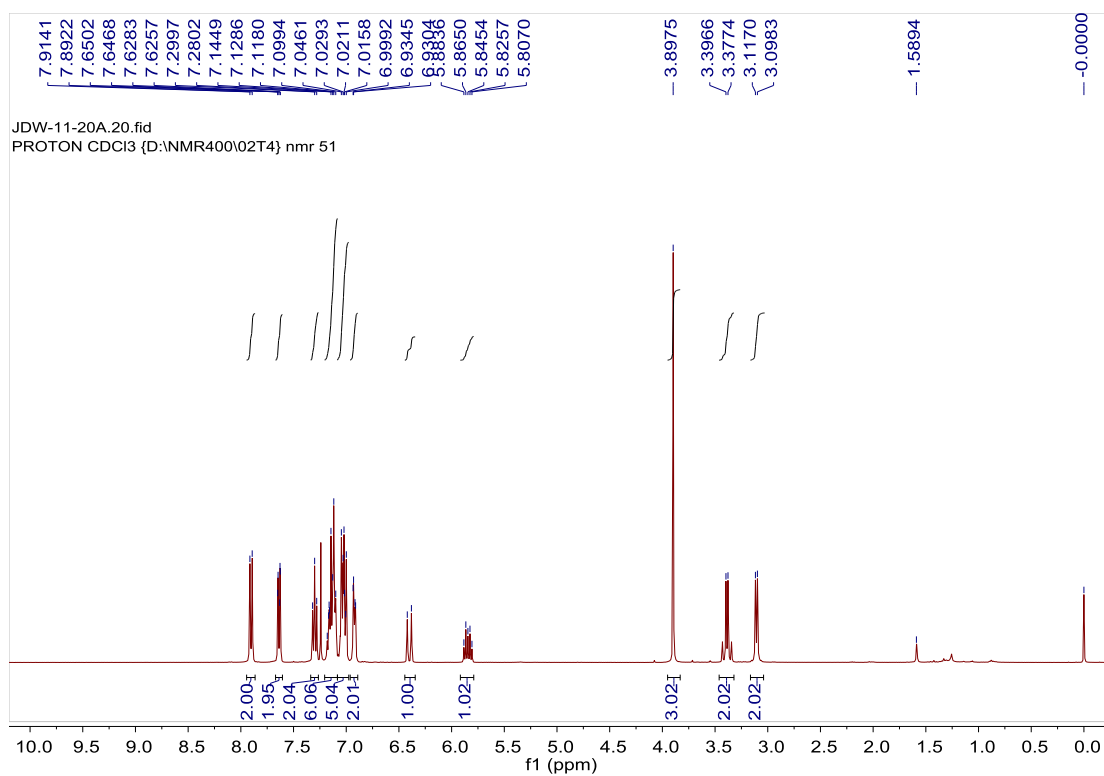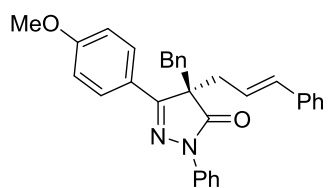

**3b** <sup>1</sup>H NMR (400 MHz, CDCl<sub>3</sub>)  
<sup>13</sup>C NMR (100 MHz, CDCl<sub>3</sub>)

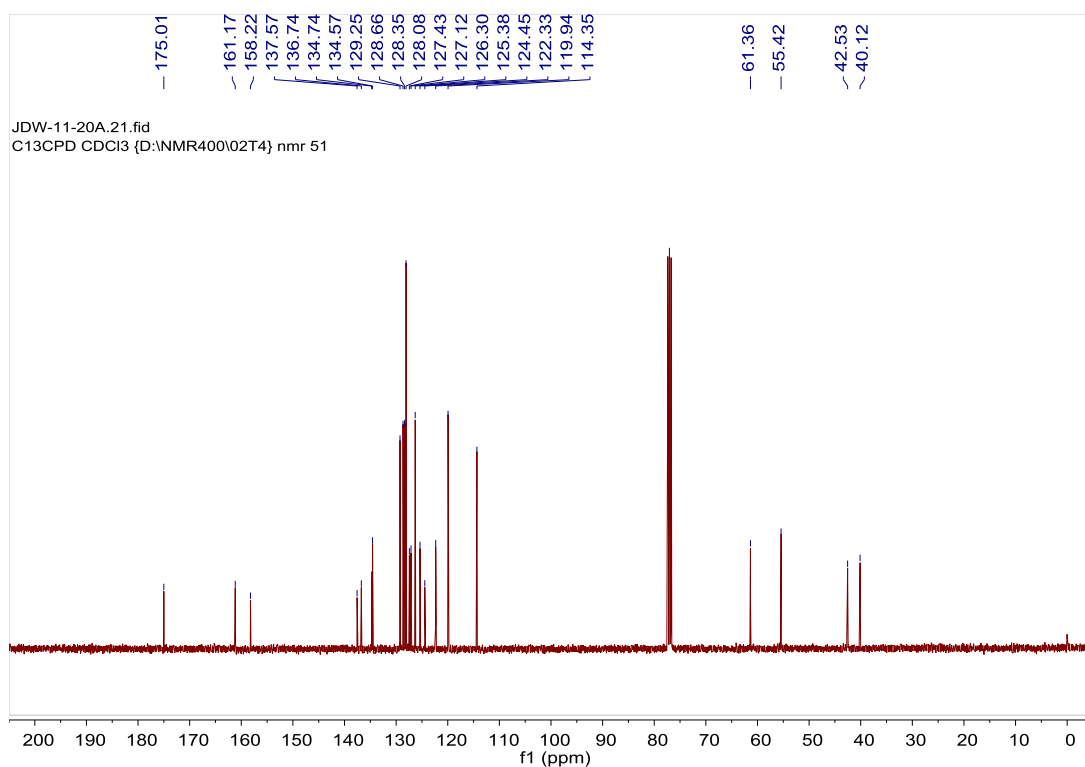

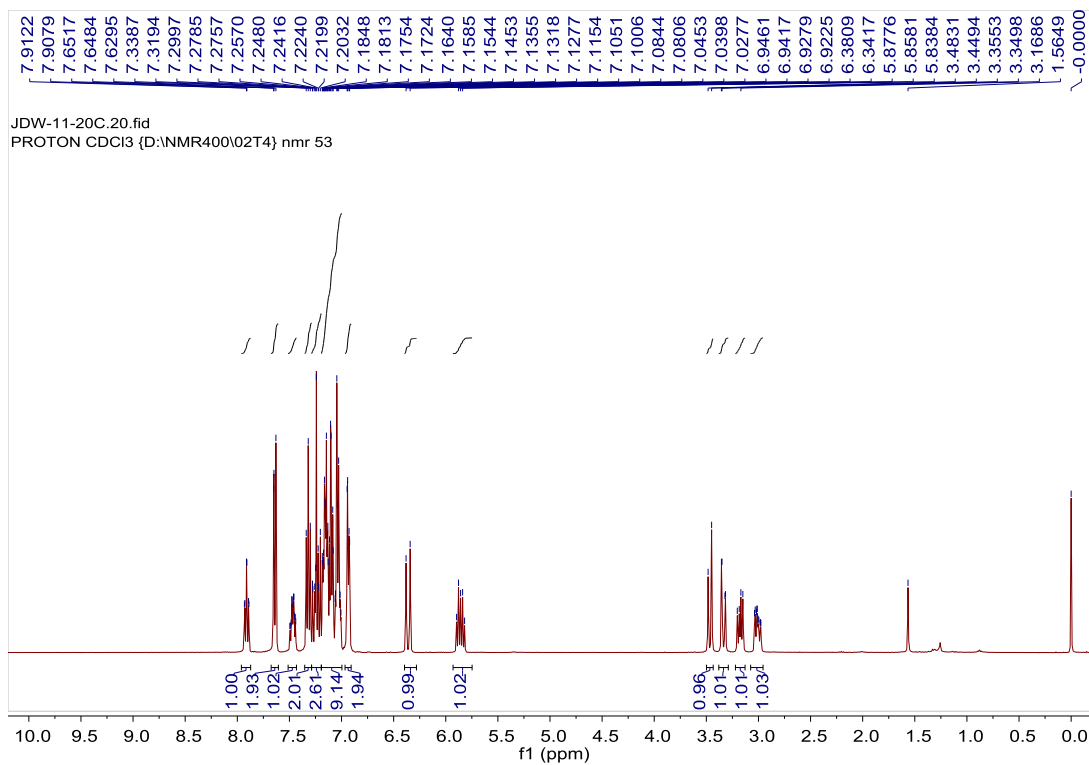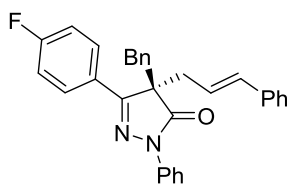

**3c** <sup>1</sup>H NMR (400 MHz, CDCl<sub>3</sub>)  
<sup>13</sup>C NMR (100 MHz, CDCl<sub>3</sub>)

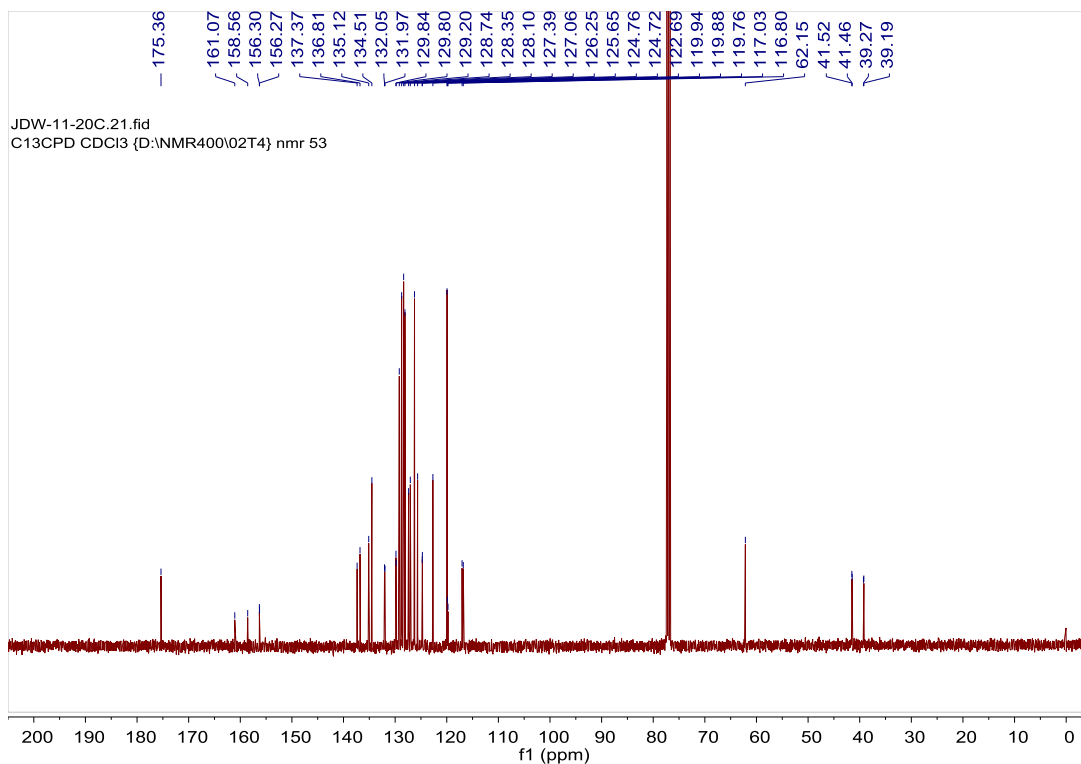

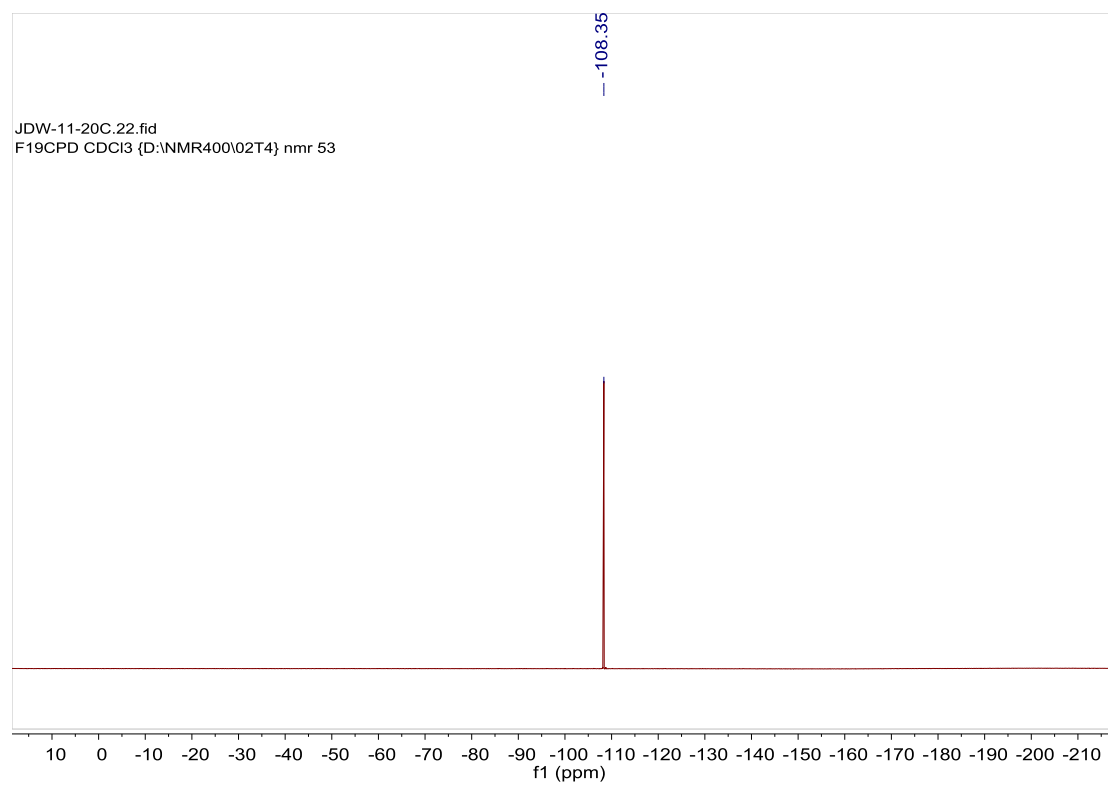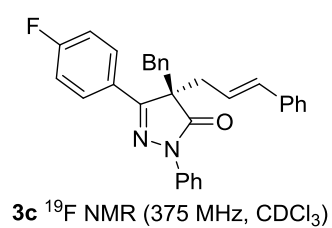

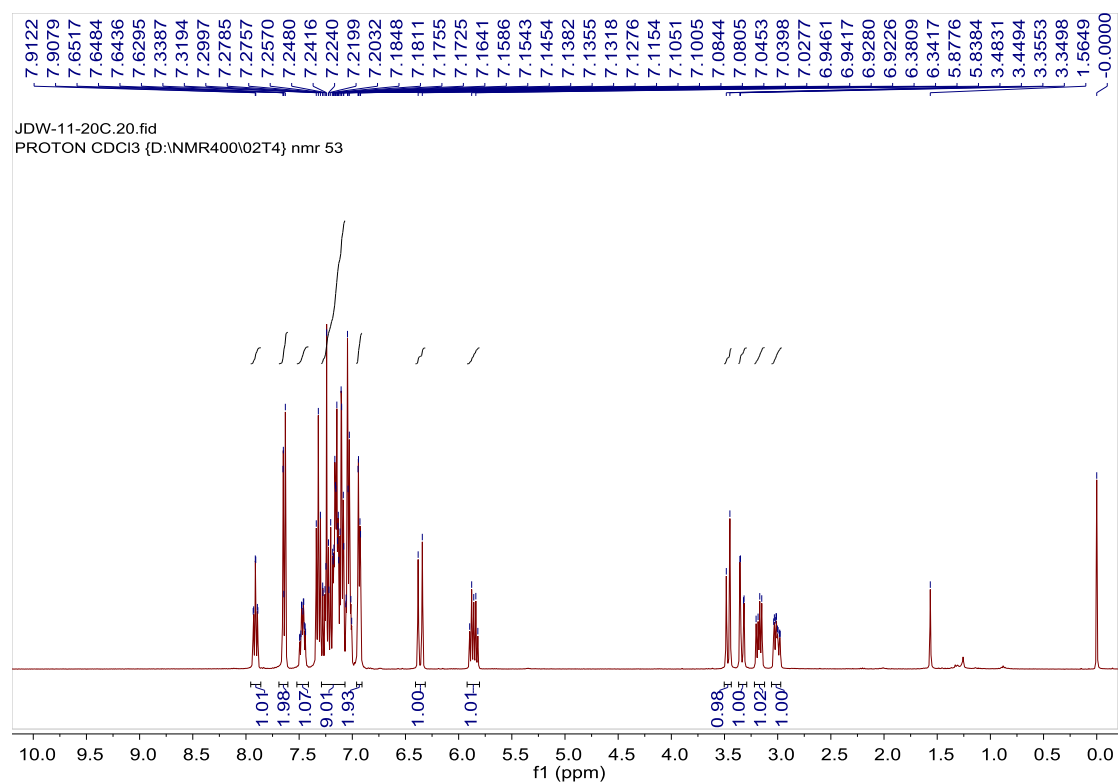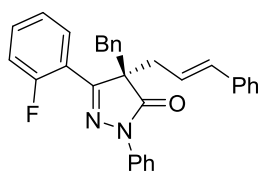

**3d** <sup>1</sup>H NMR (400 MHz, CDCl<sub>3</sub>)  
<sup>13</sup>C NMR (100 MHz, CDCl<sub>3</sub>)

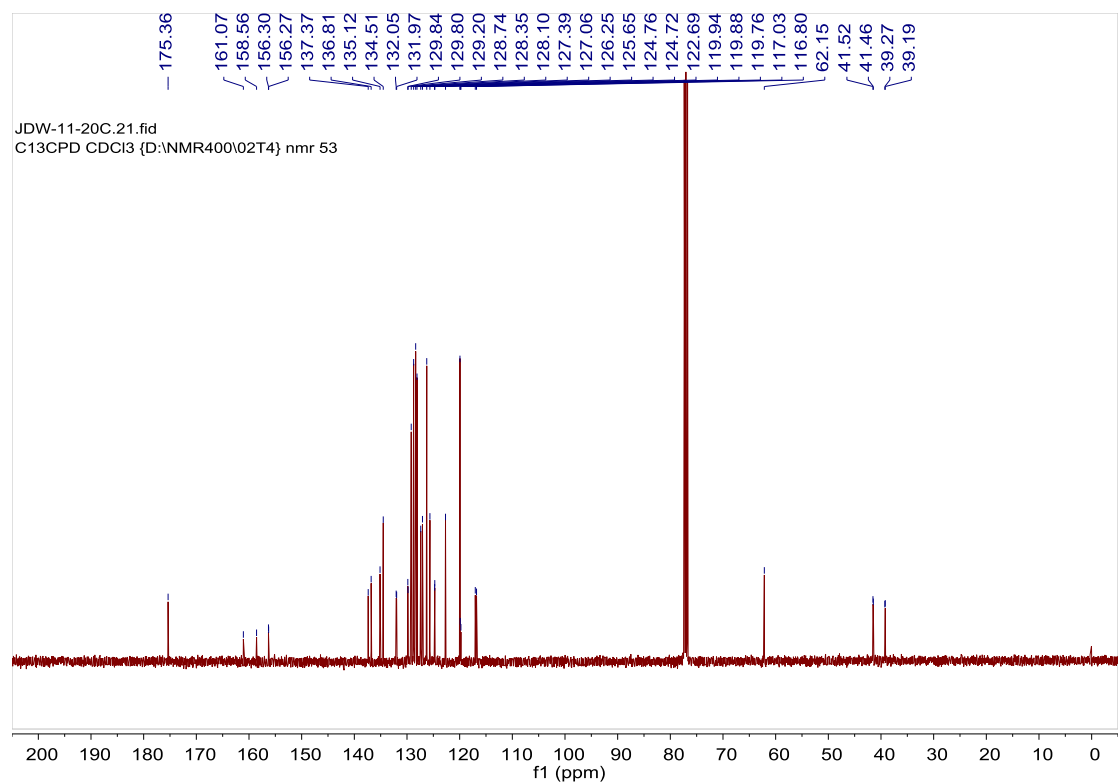



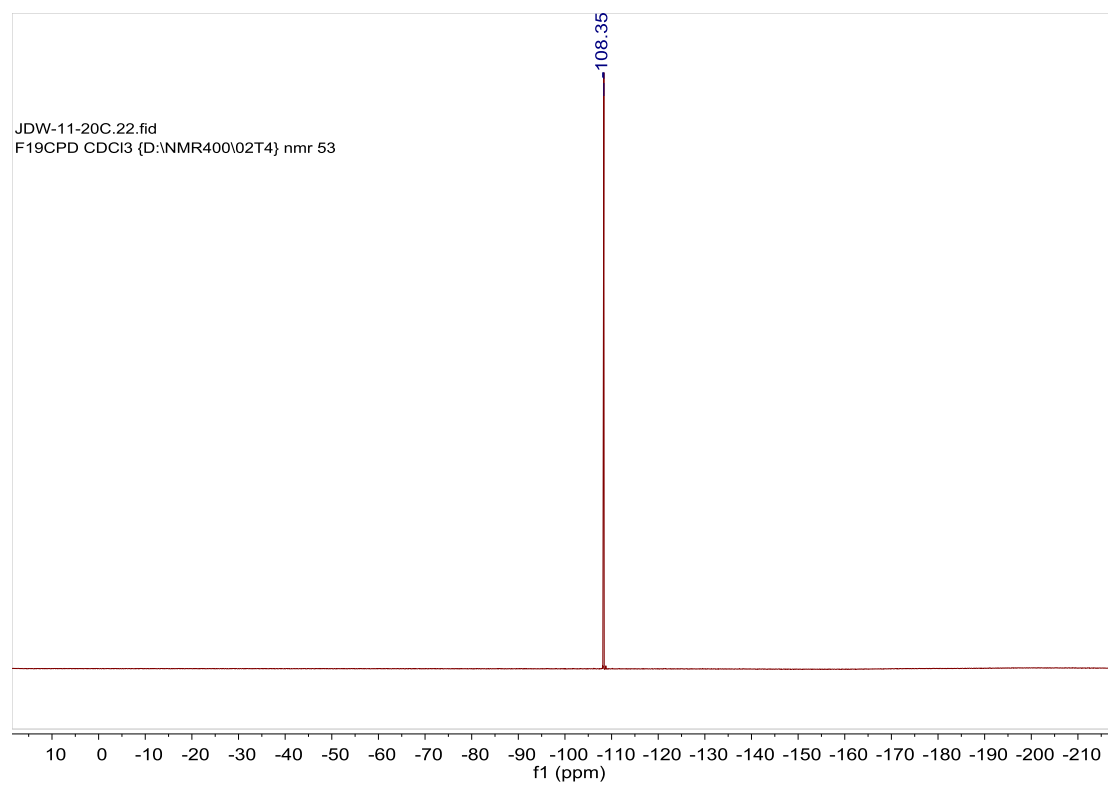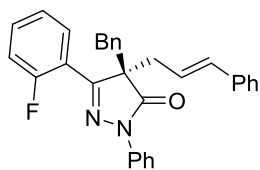

**3d** <sup>19</sup>F NMR (375 MHz, CDCl<sub>3</sub>)

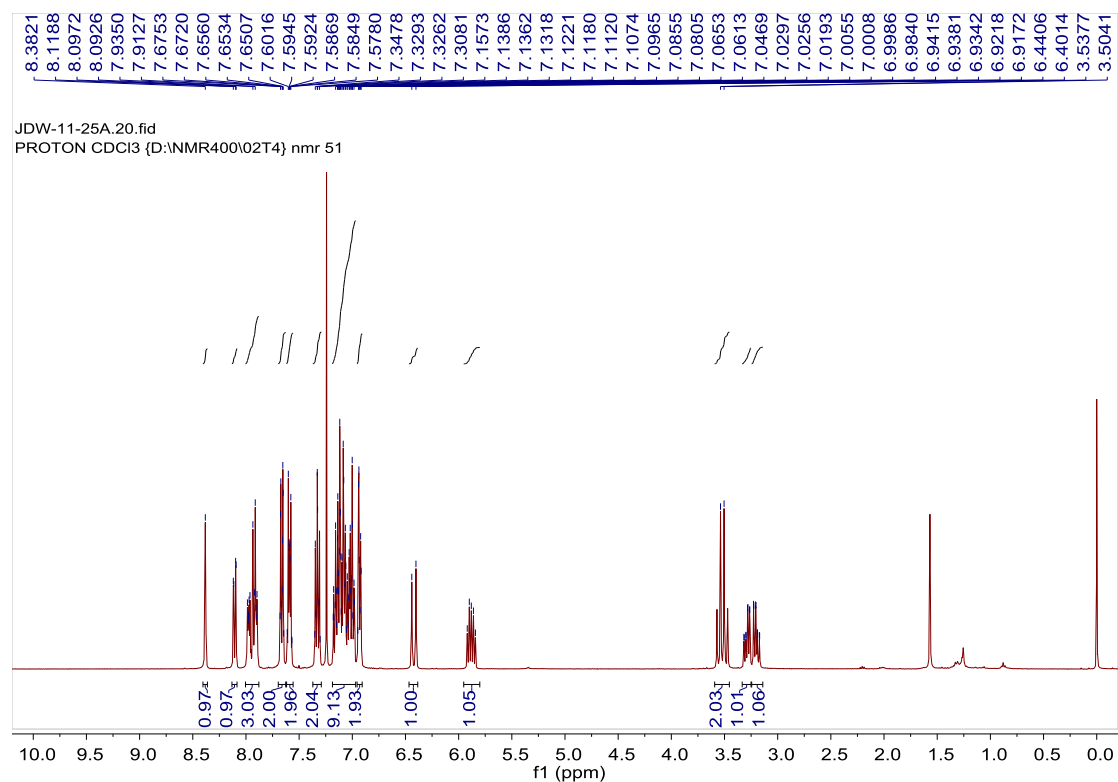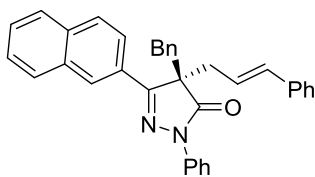

**3e** <sup>1</sup>H NMR (400 MHz, CDCl<sub>3</sub>)

<sup>13</sup>C NMR (100 MHz, CDCl<sub>3</sub>)

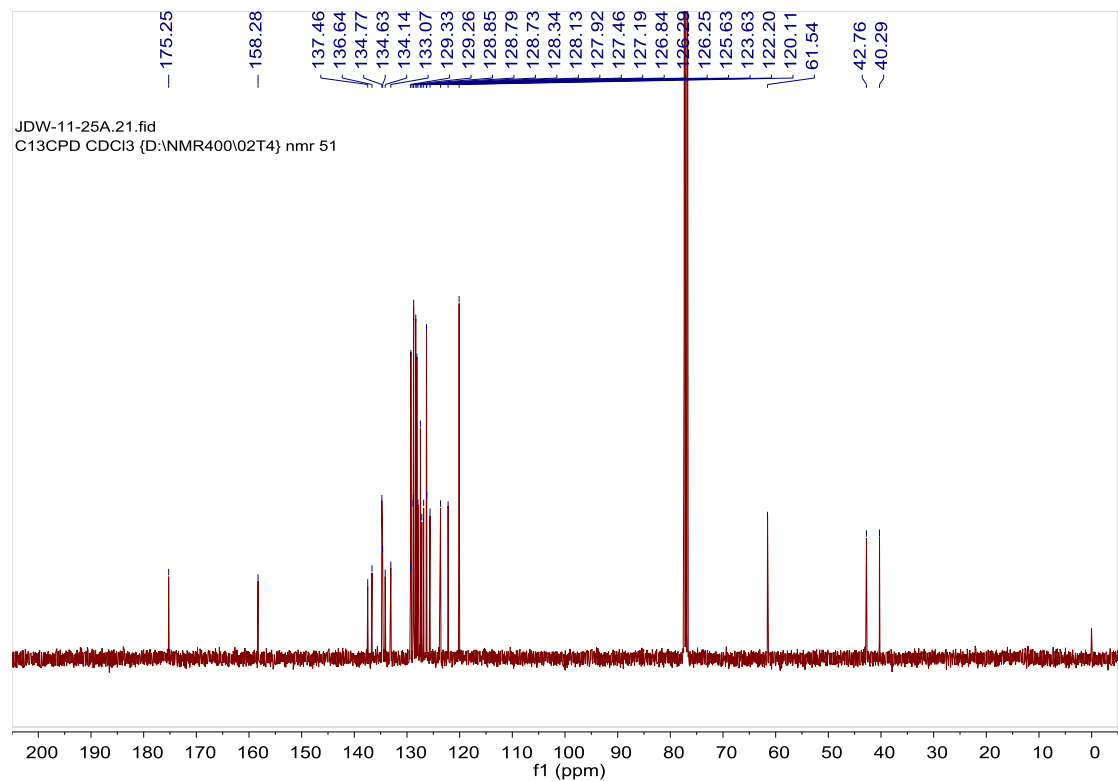



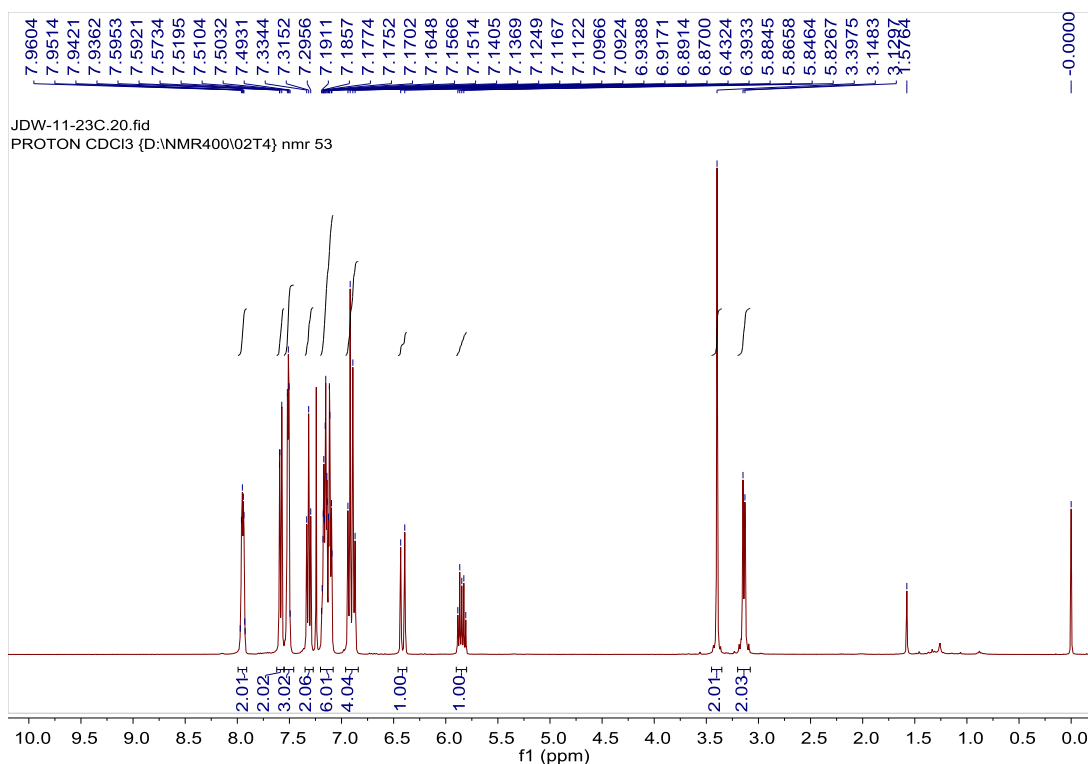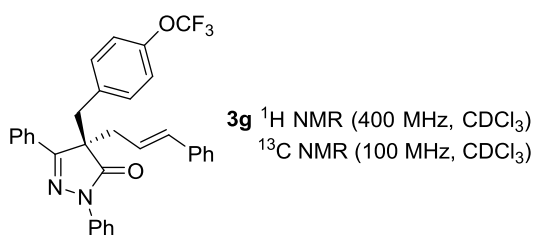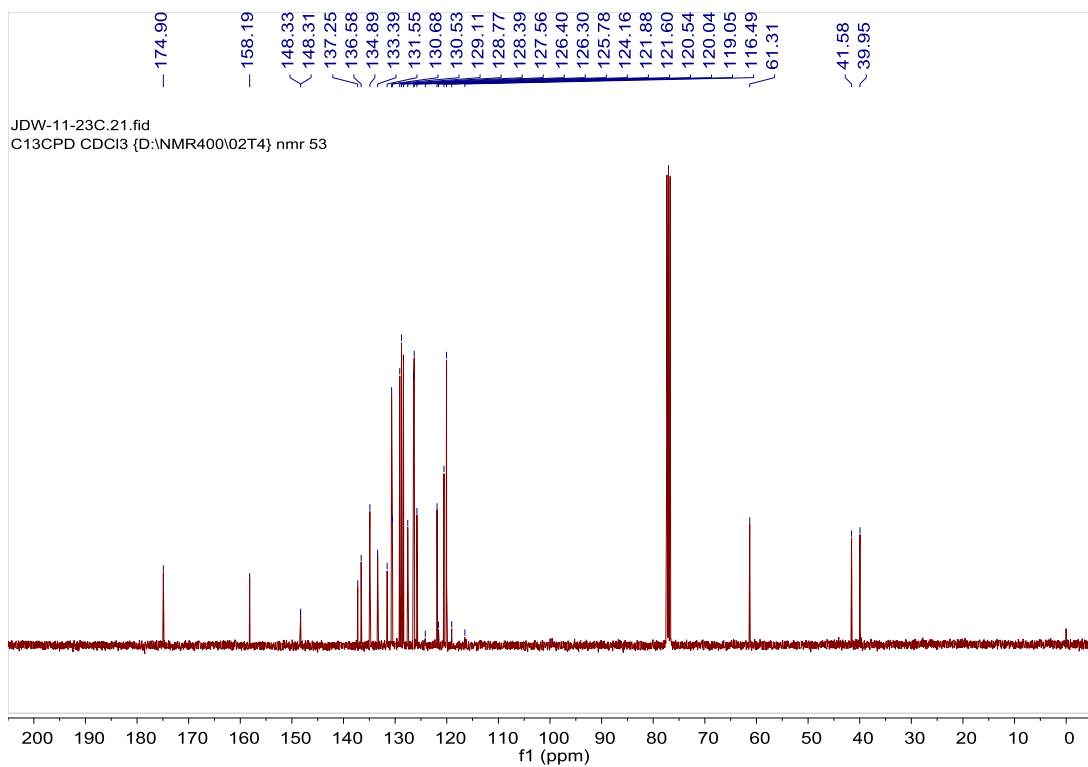

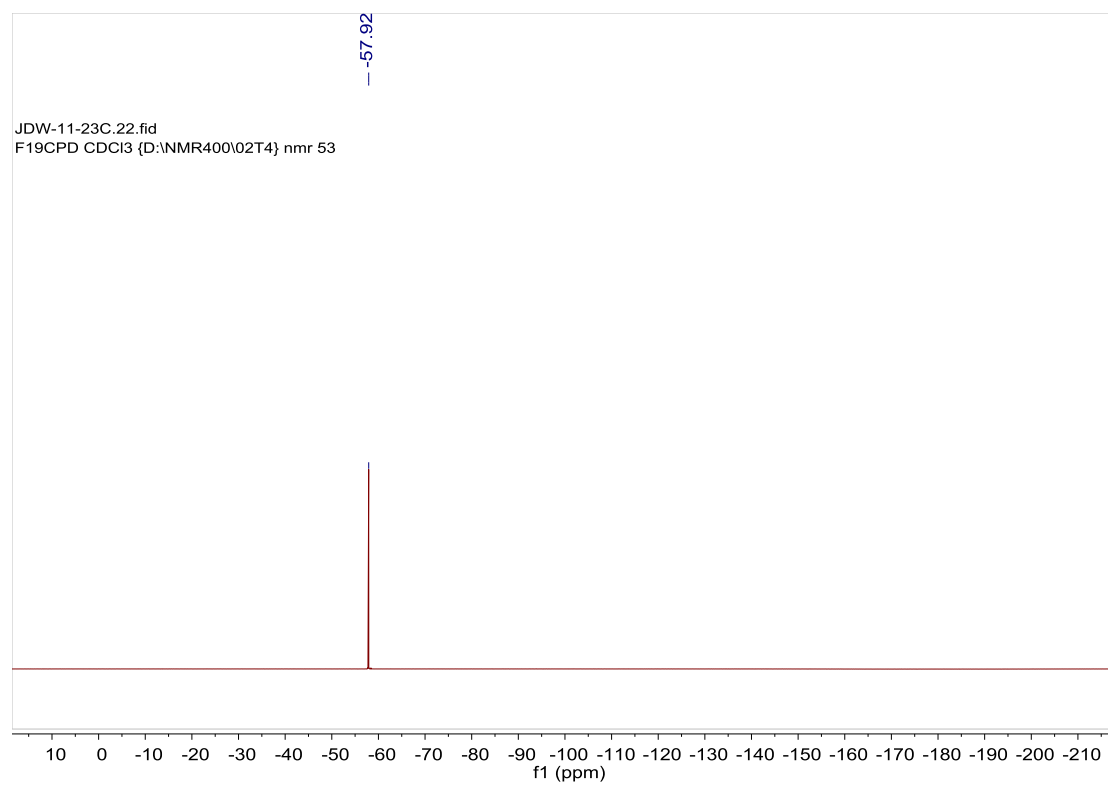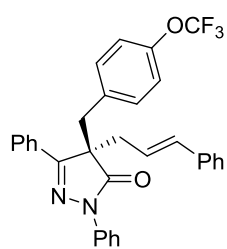

**3g** <sup>19</sup>F NMR (375 MHz, CDCl<sub>3</sub>)



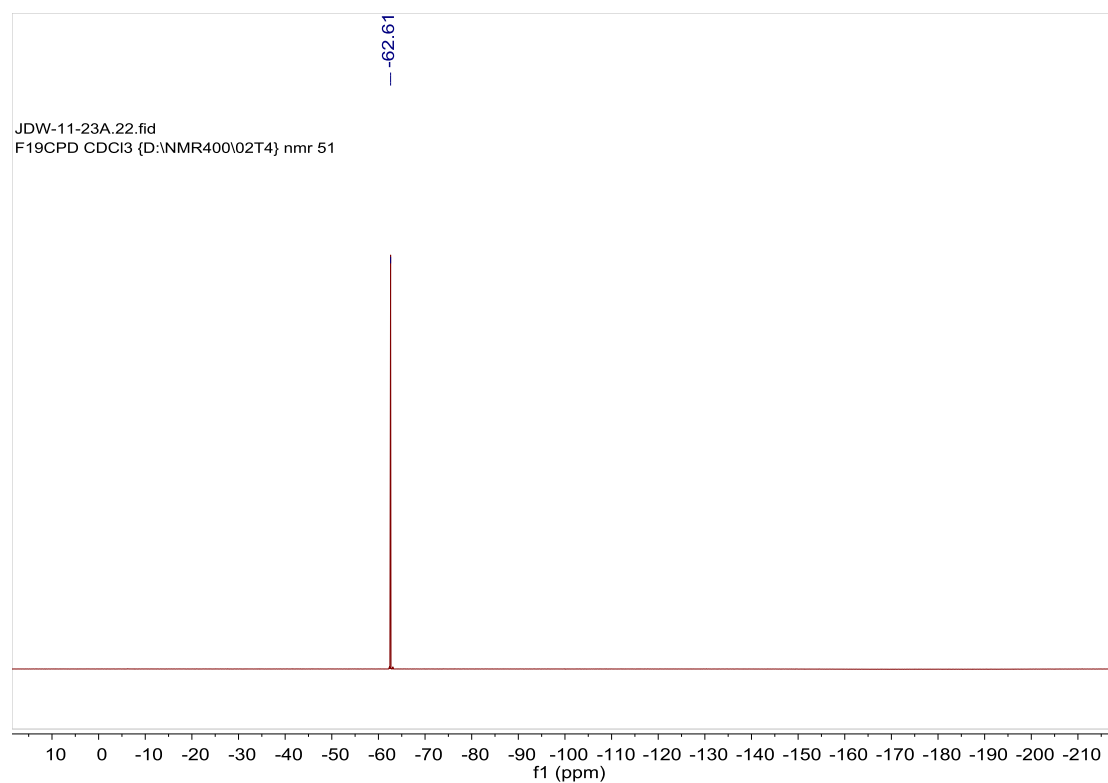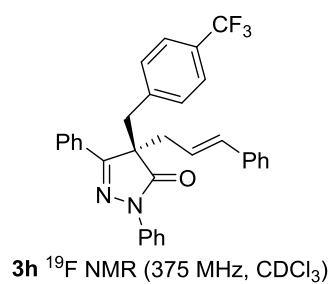

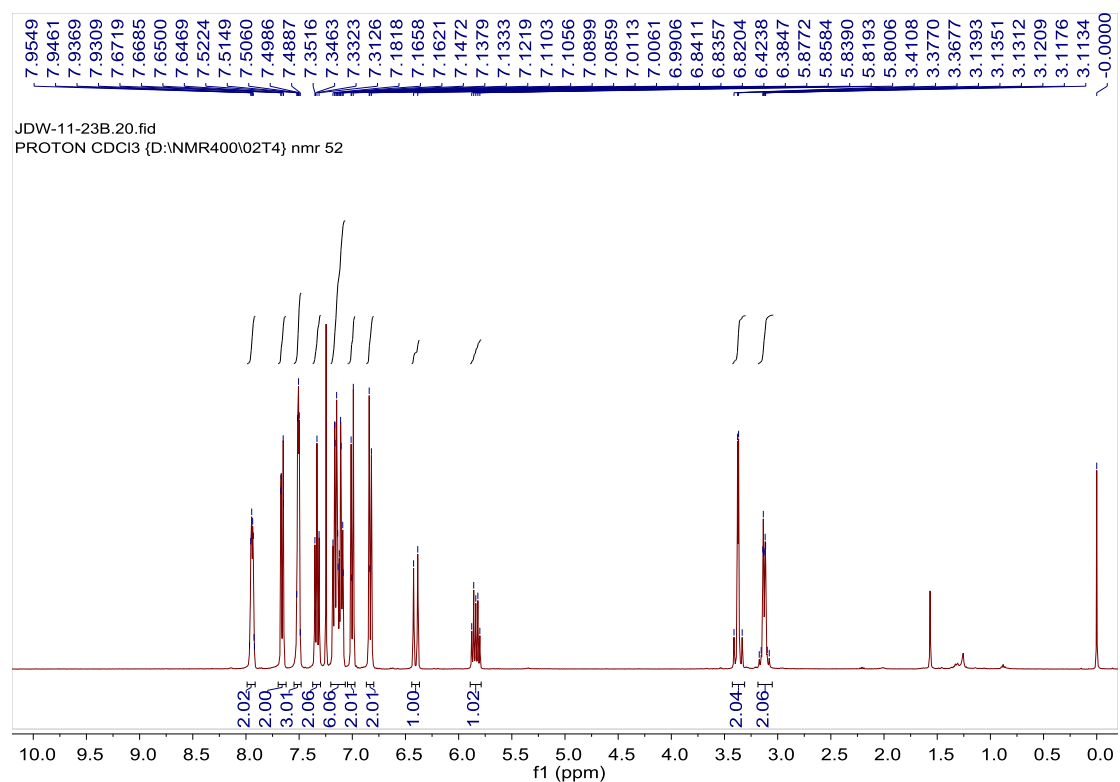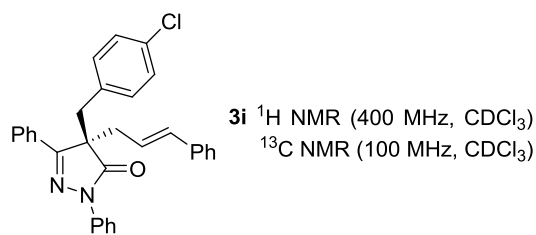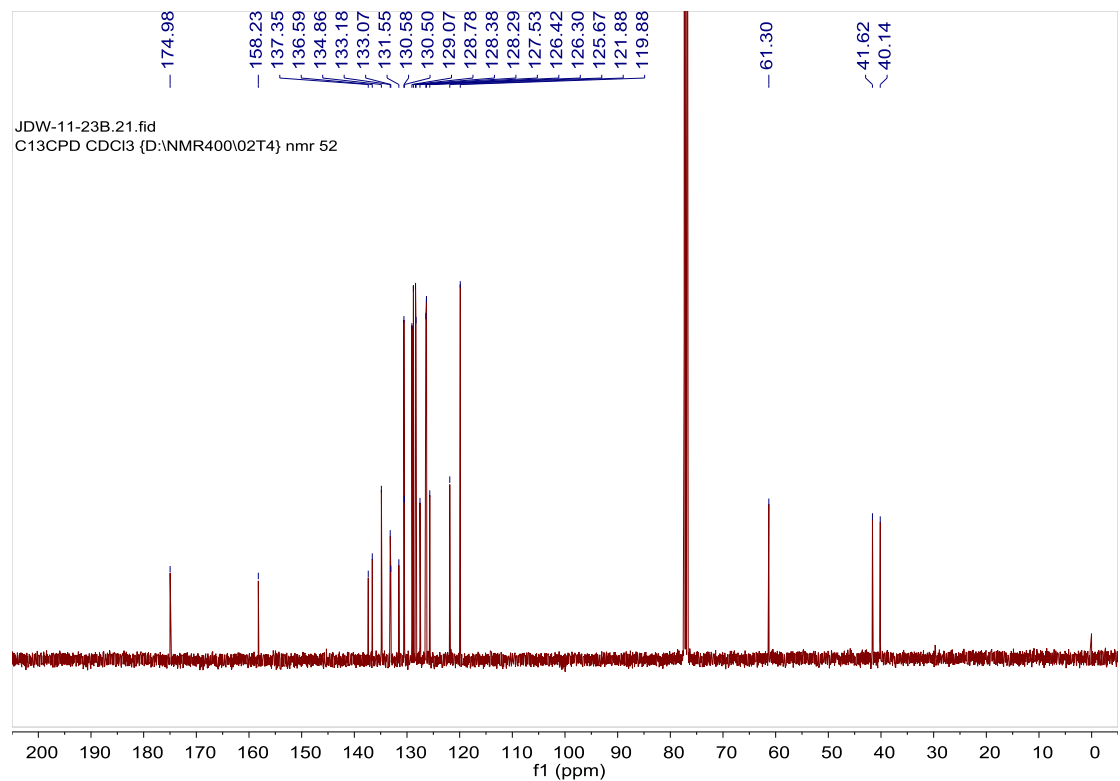



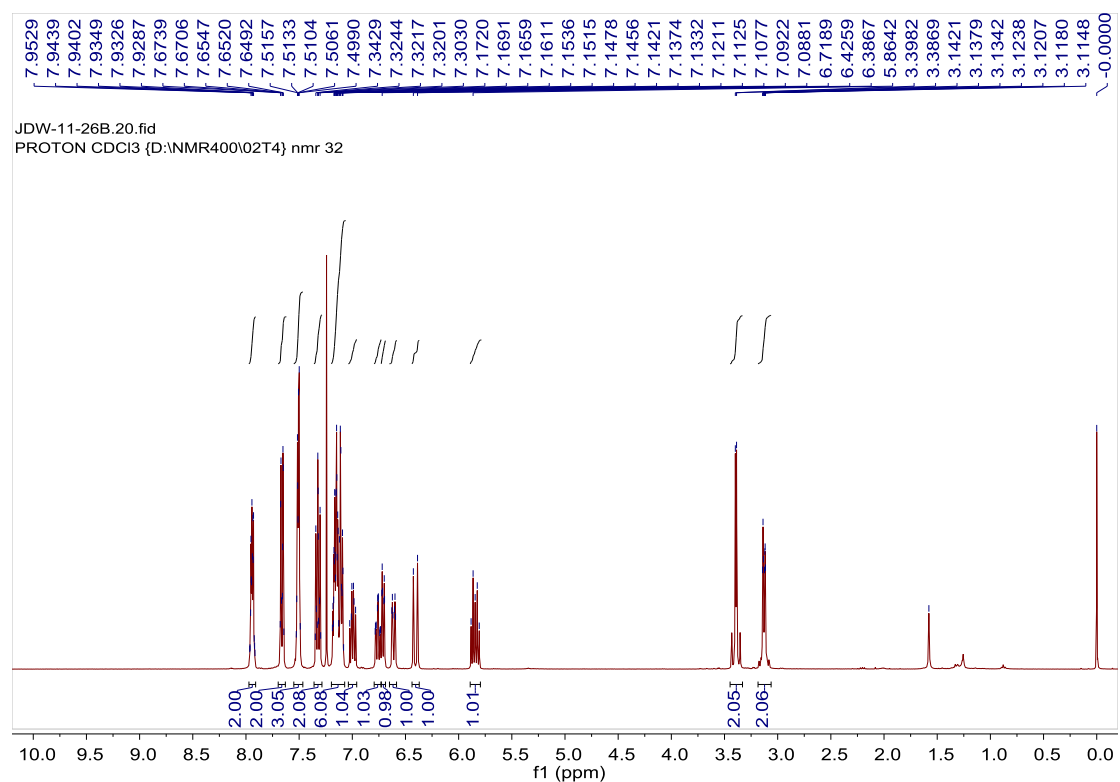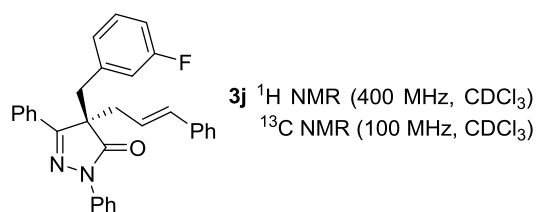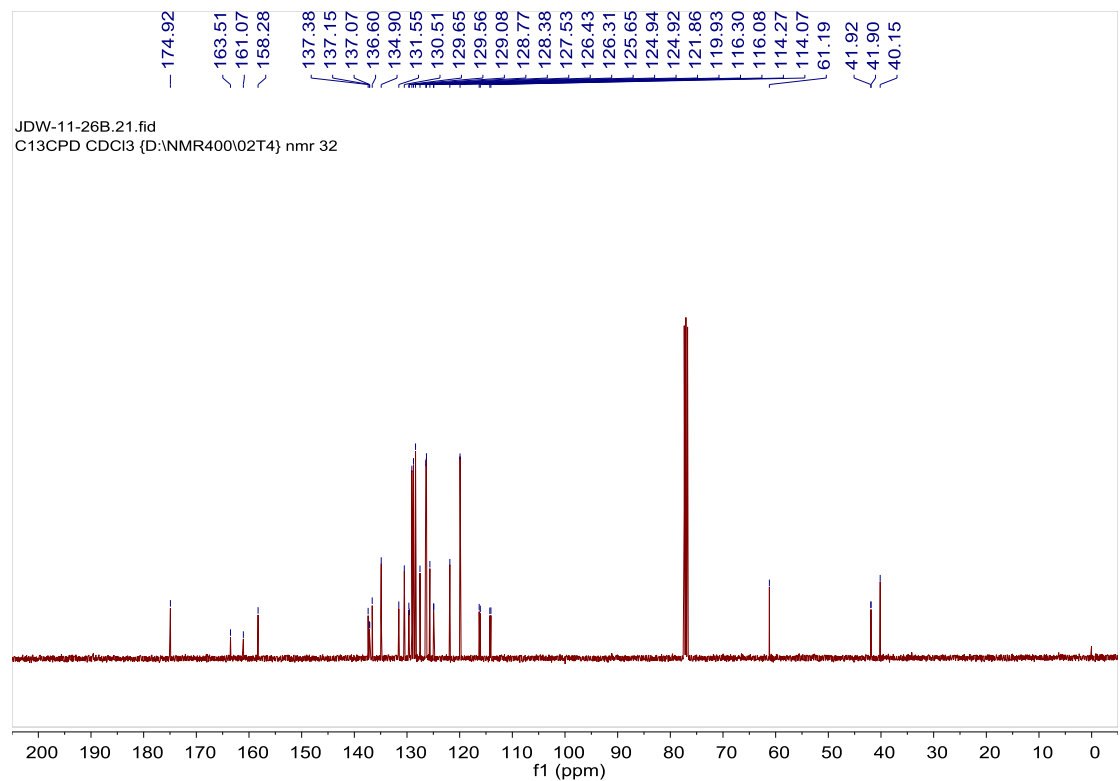

JDW-11-26B.22.fid  
F19CPD CDCl3 {D:\NMR400\02T4} nmr 32

113.21

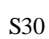

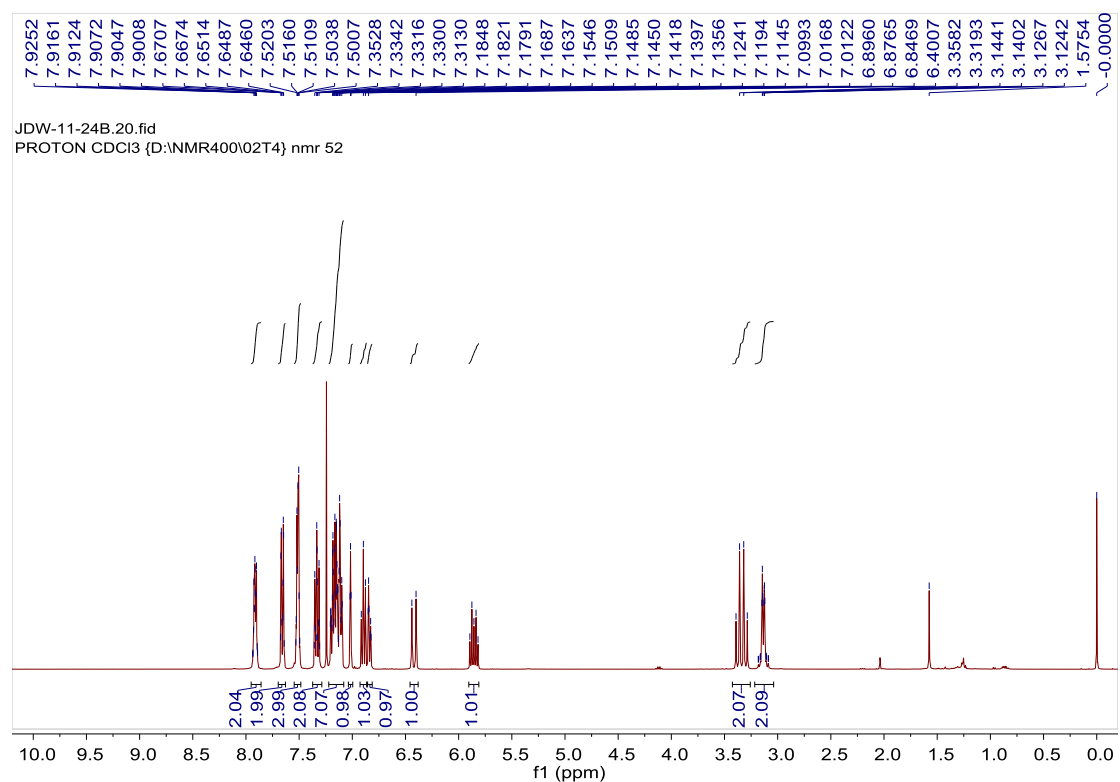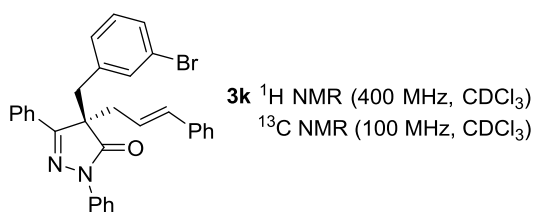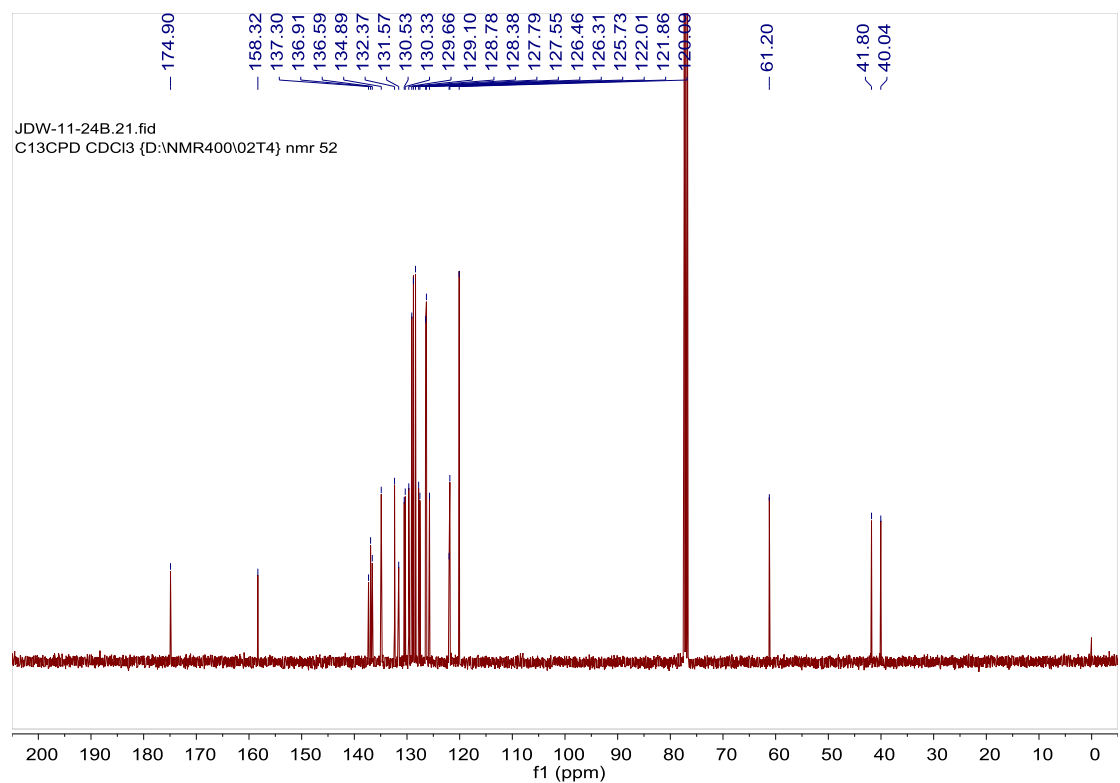

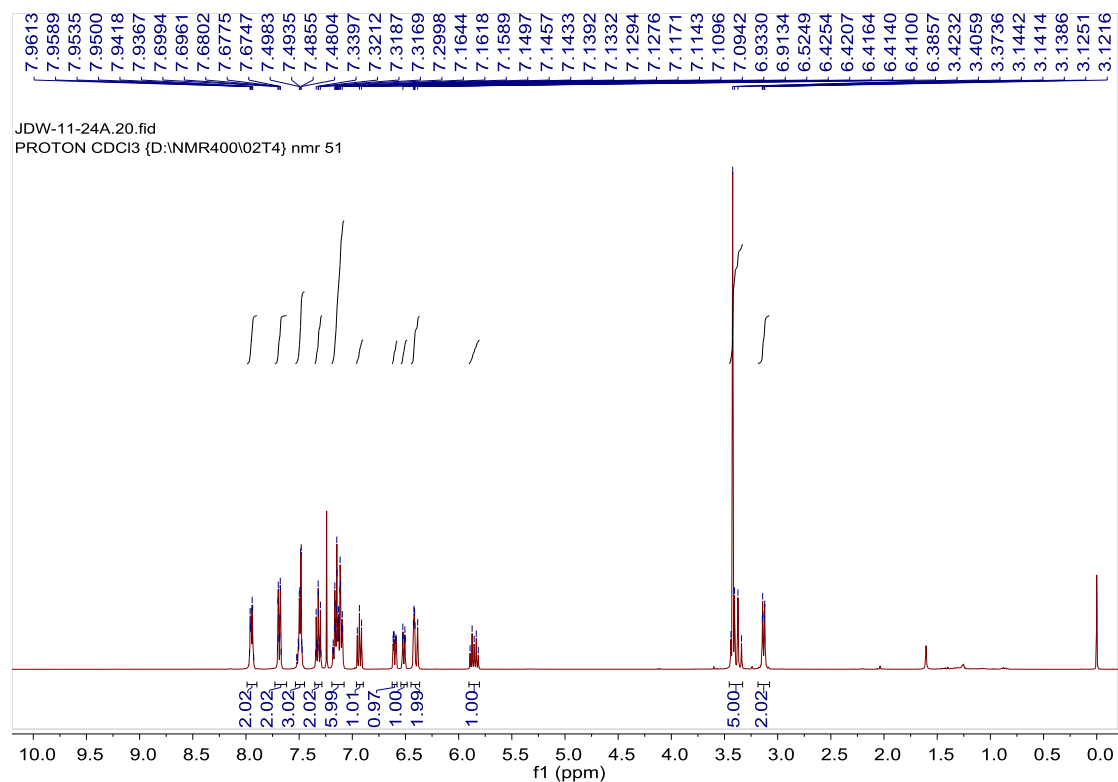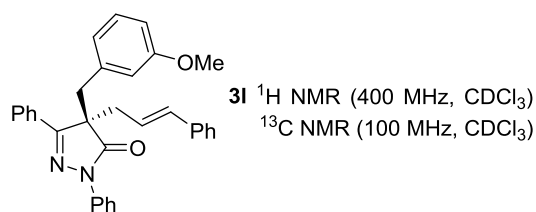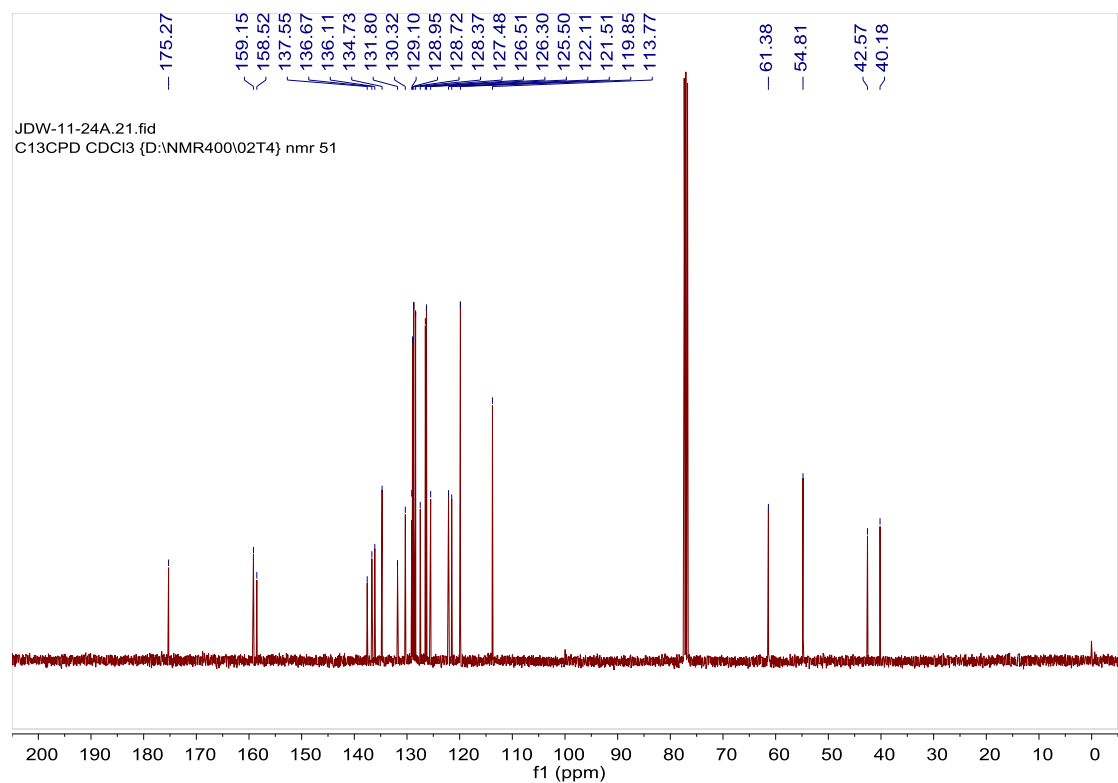

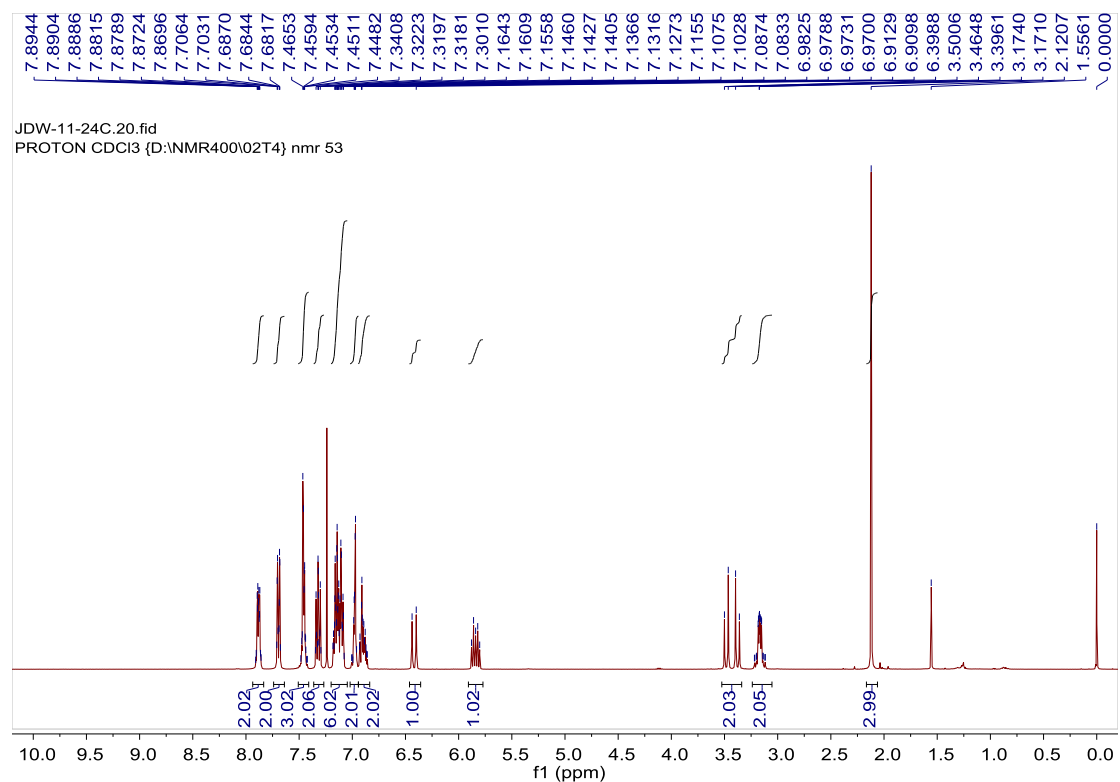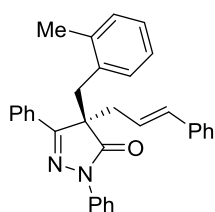

**3m** <sup>1</sup>H NMR (400 MHz, CDCl<sub>3</sub>)  
<sup>13</sup>C NMR (100 MHz, CDCl<sub>3</sub>)

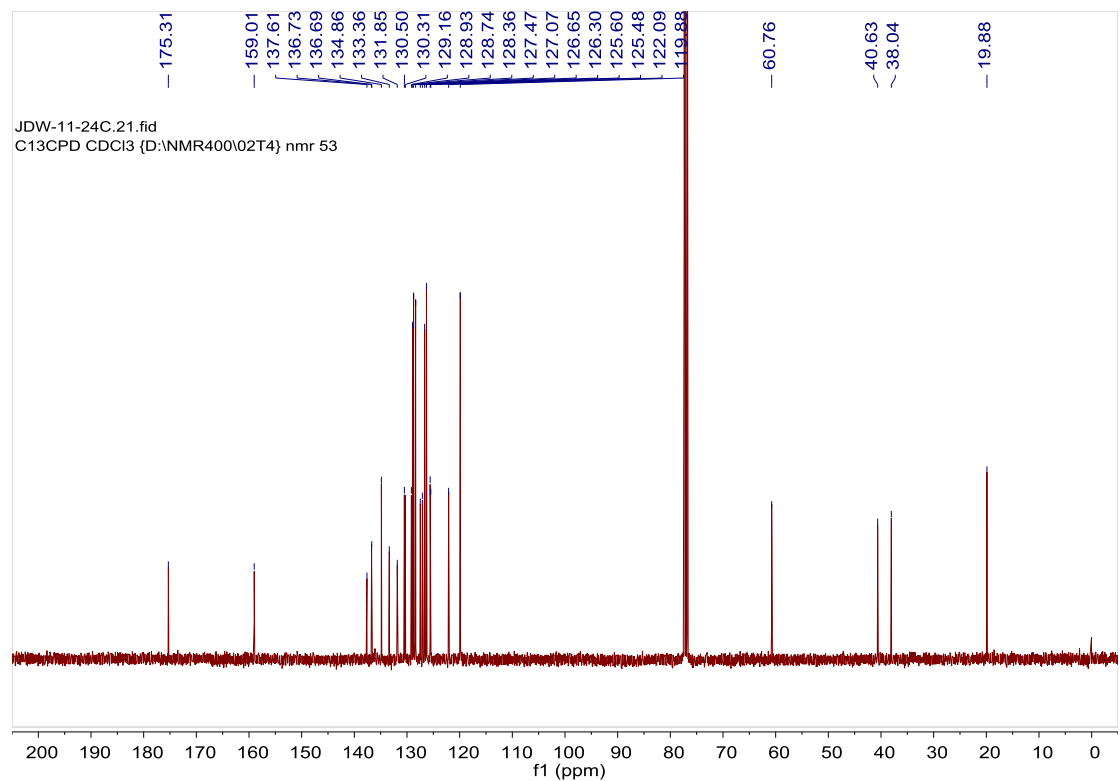

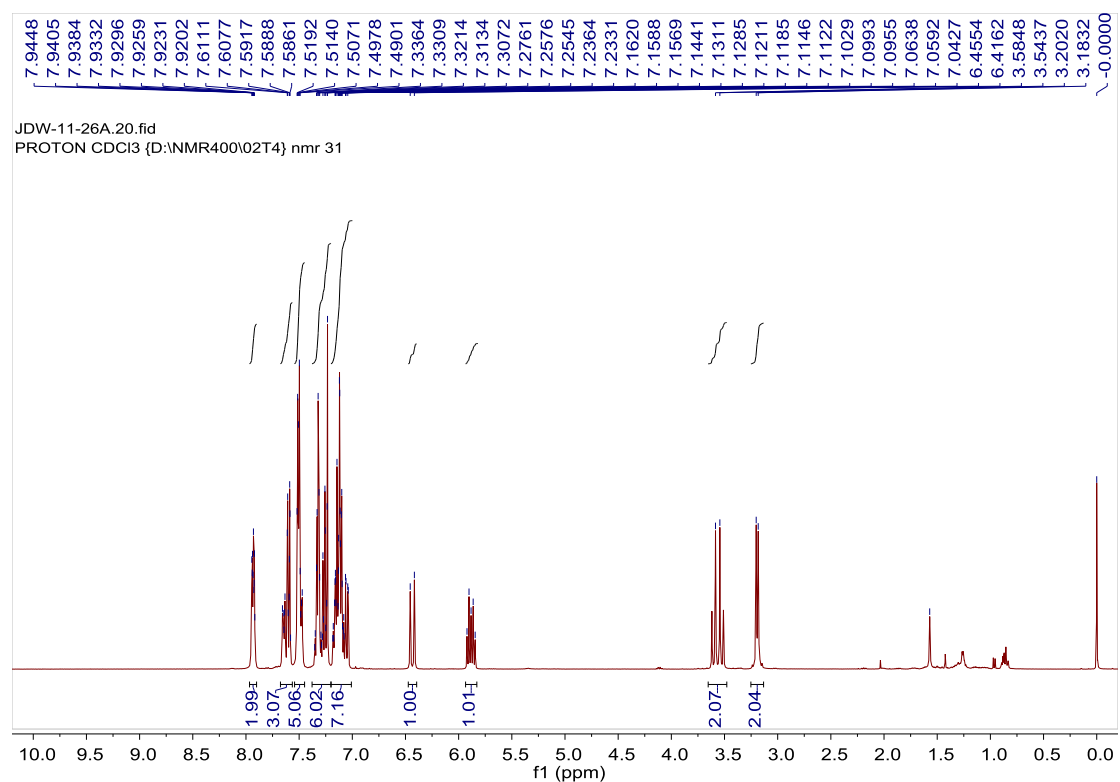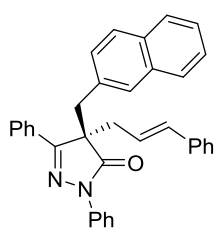

**3n** <sup>1</sup>H NMR (400 MHz, CDCl<sub>3</sub>)  
<sup>13</sup>C NMR (100 MHz, CDCl<sub>3</sub>)

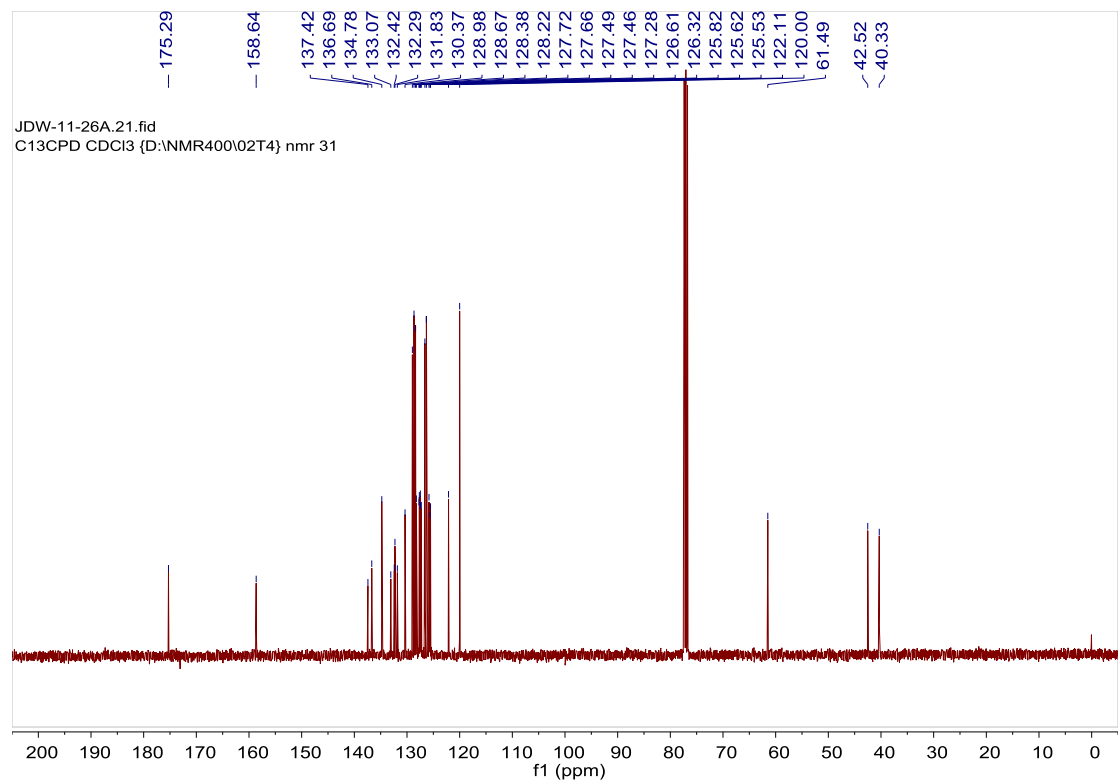

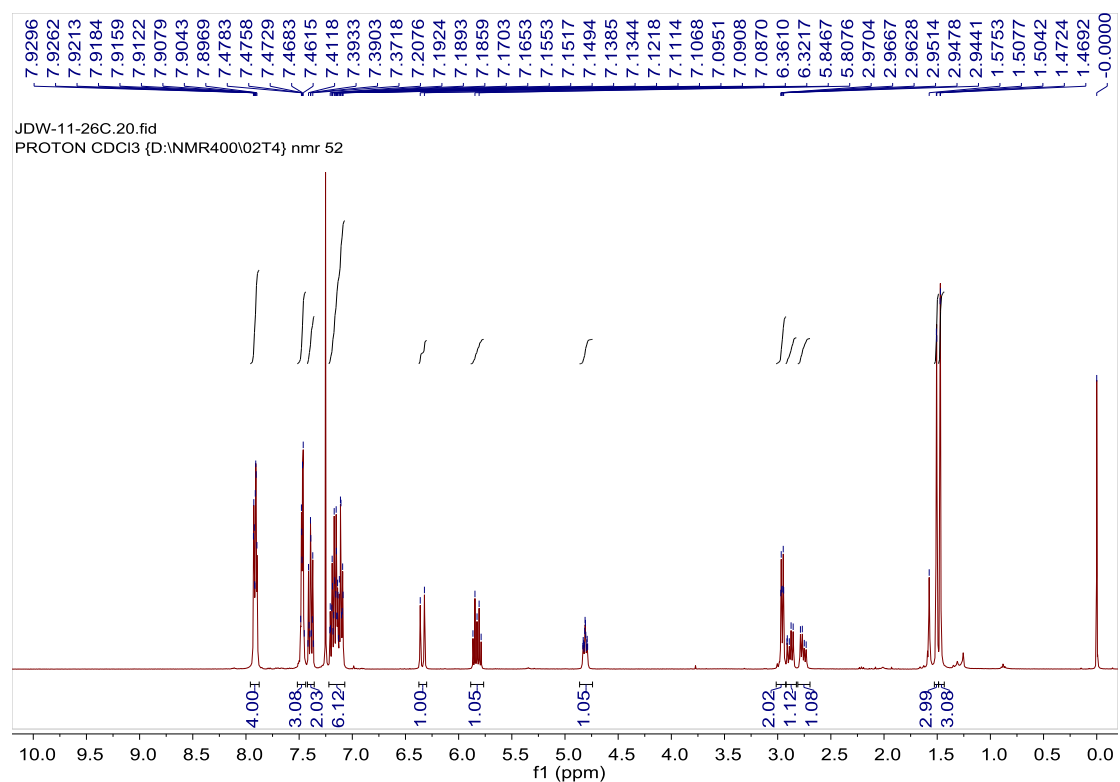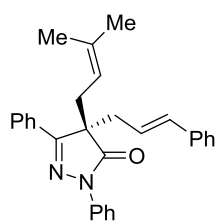

**3o** <sup>1</sup>H NMR (400 MHz, CDCl<sub>3</sub>)  
<sup>13</sup>C NMR (100 MHz, CDCl<sub>3</sub>)

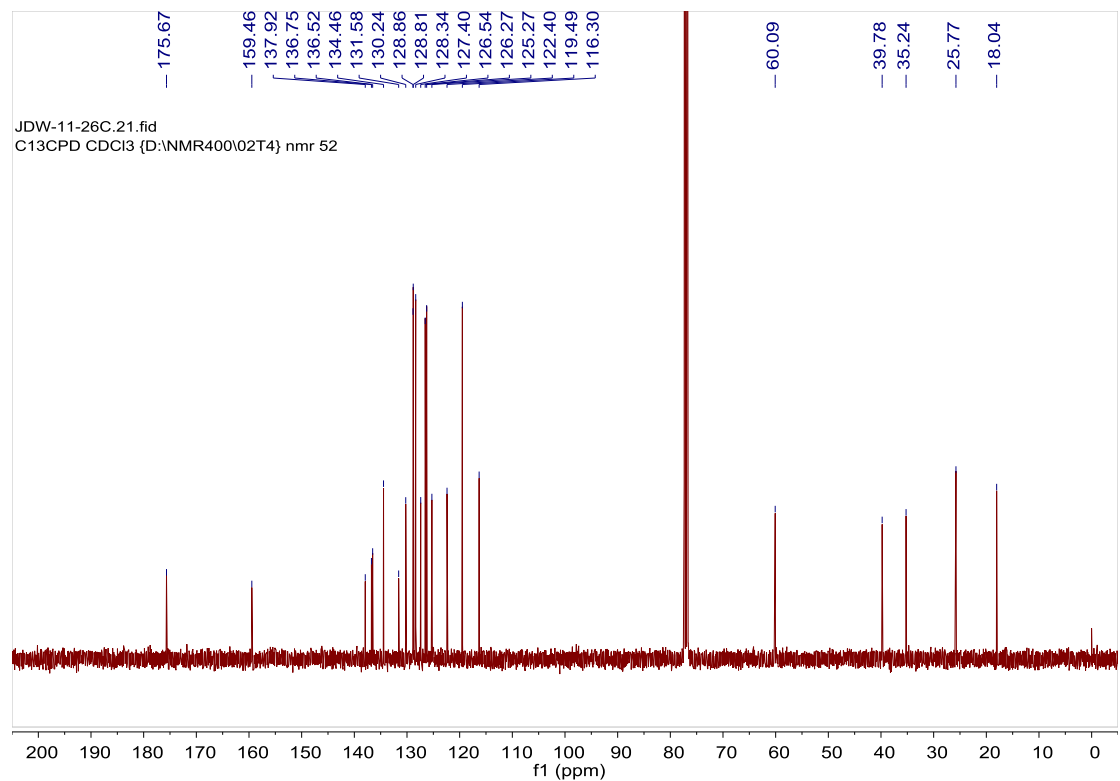

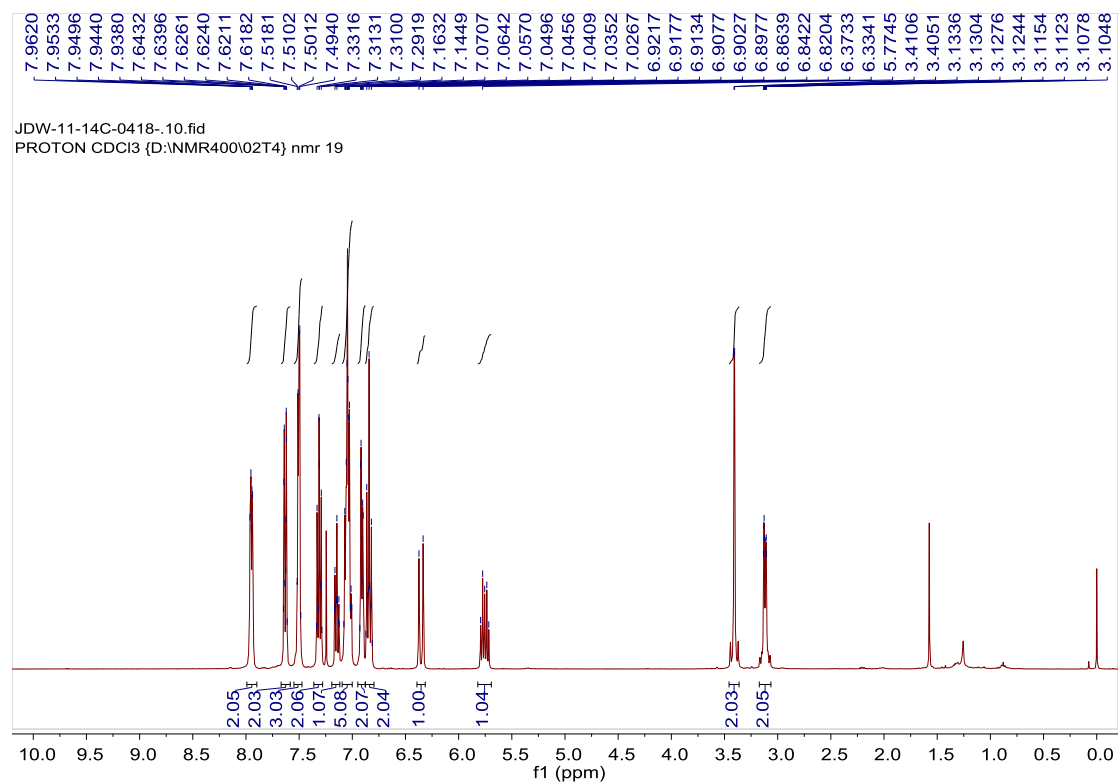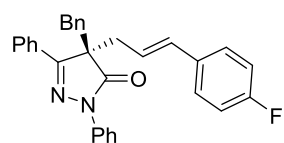

**3p** <sup>1</sup>H NMR (400 MHz, CDCl<sub>3</sub>)

<sup>13</sup>C NMR (100 MHz, CDCl<sub>3</sub>)

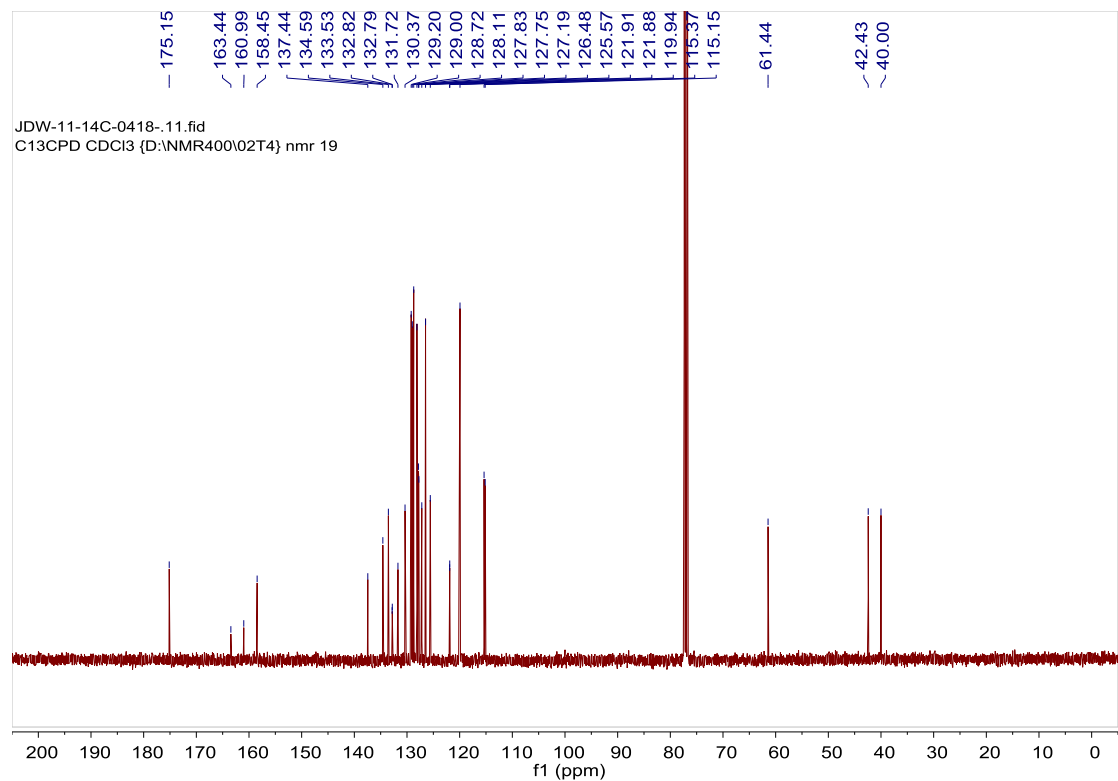



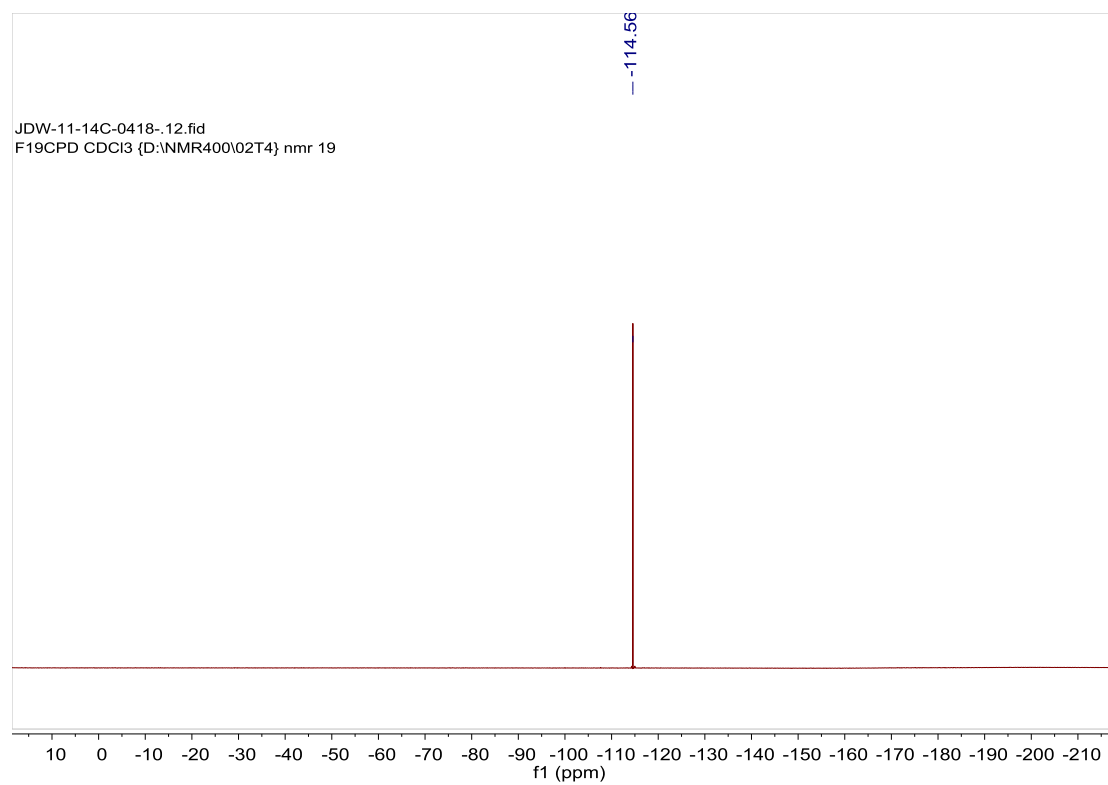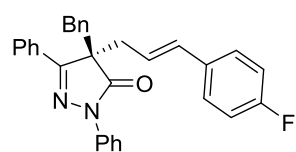

**3p** <sup>19</sup>F NMR (375 MHz, CDCl<sub>3</sub>)

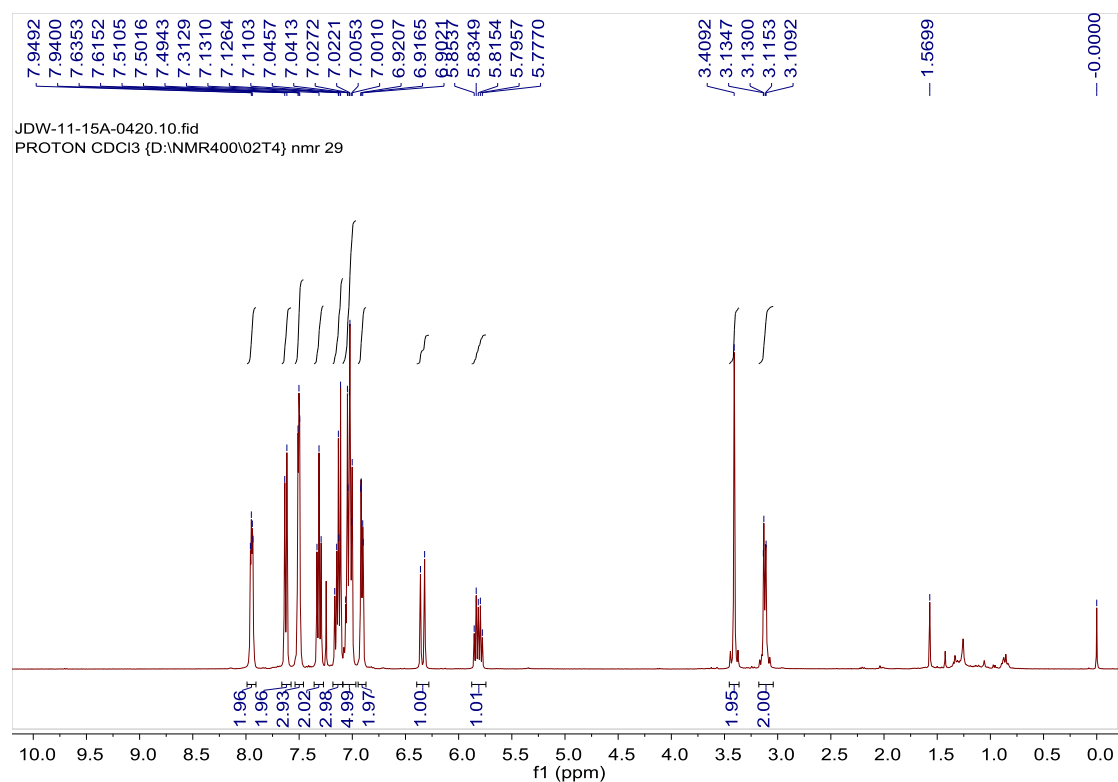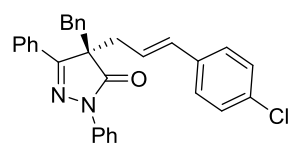

**3q** <sup>1</sup>H NMR (400 MHz, CDCl<sub>3</sub>)

<sup>13</sup>C NMR (100 MHz, CDCl<sub>3</sub>)

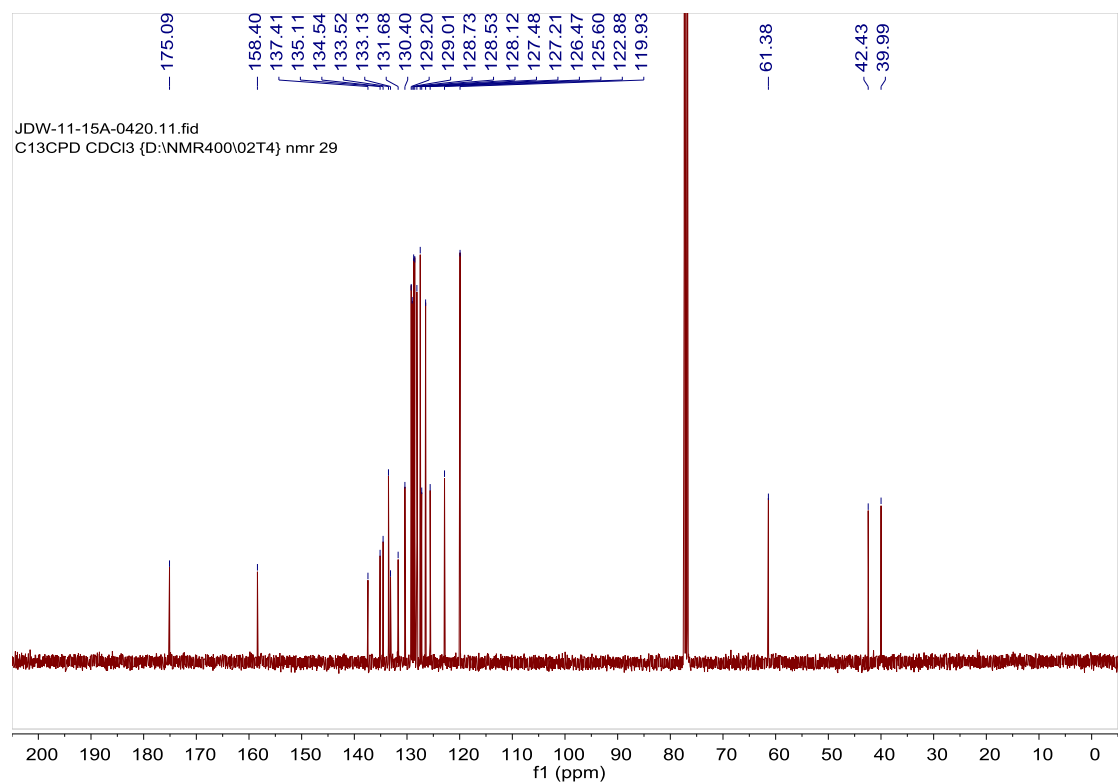

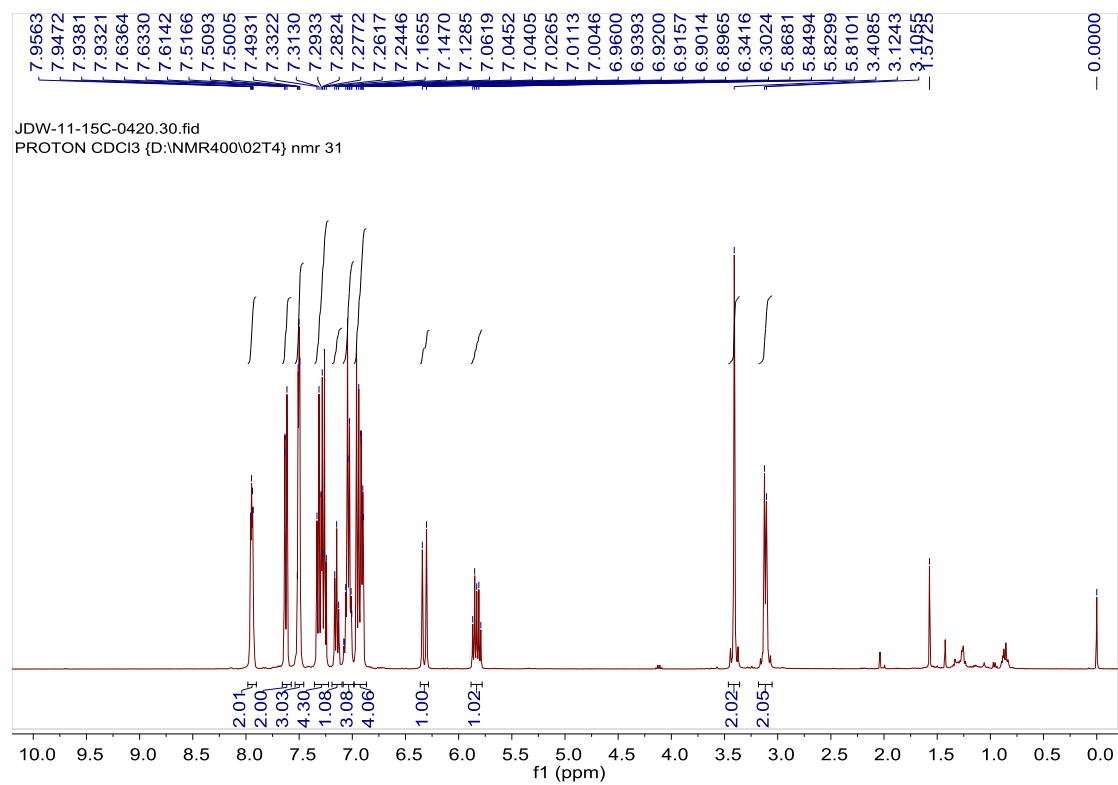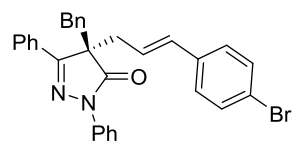

**3r** <sup>1</sup>H NMR (400 MHz, CDCl<sub>3</sub>)

<sup>13</sup>C NMR (100 MHz, CDCl<sub>3</sub>)

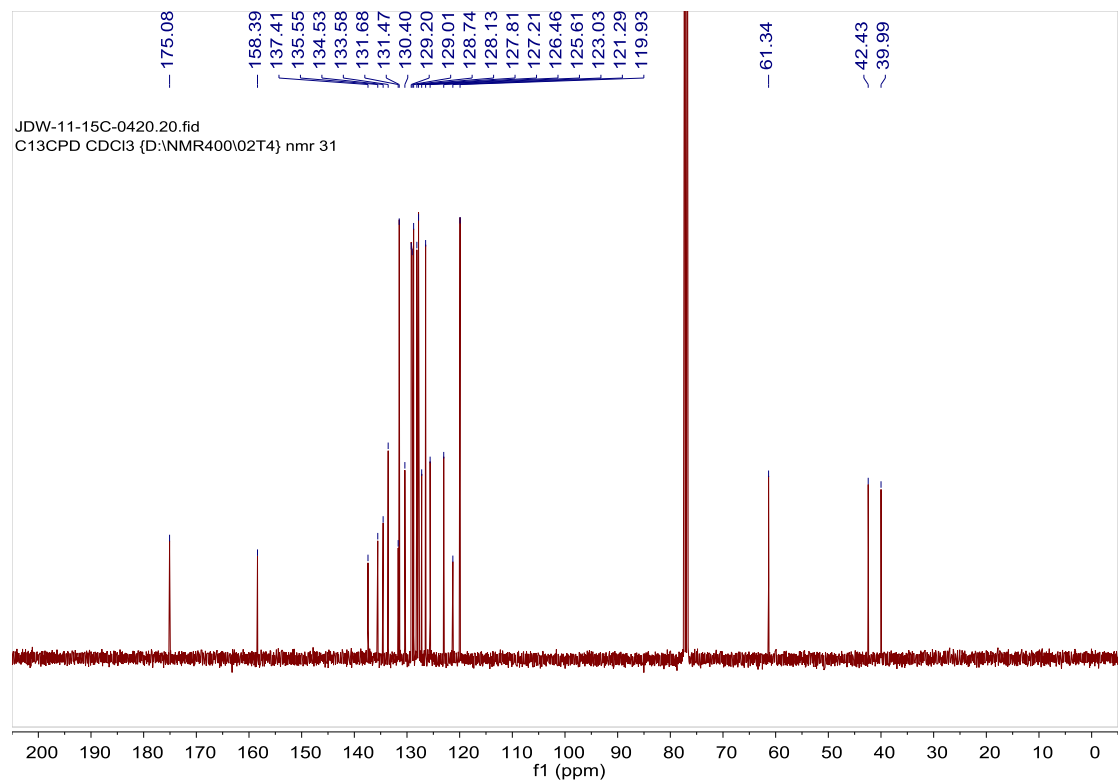

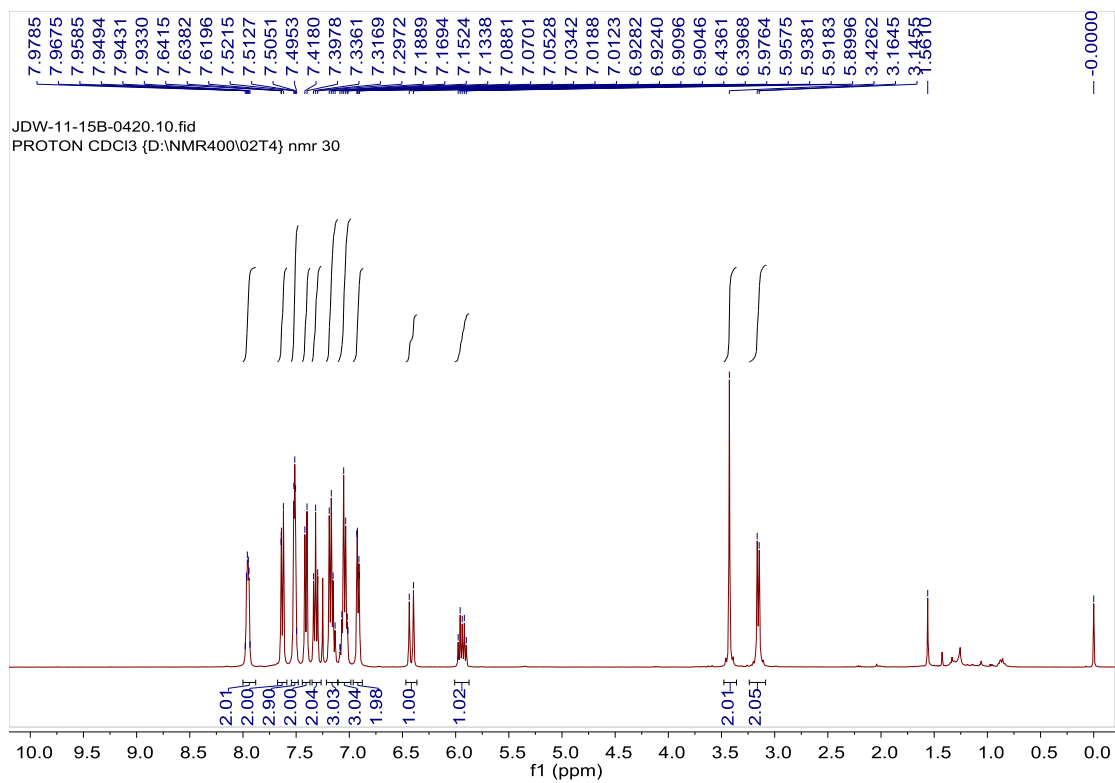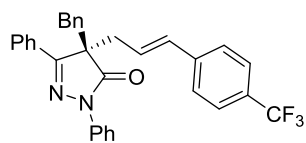

**3s** <sup>1</sup>H NMR (400 MHz, CDCl<sub>3</sub>)

<sup>13</sup>C NMR (100 MHz, CDCl<sub>3</sub>)

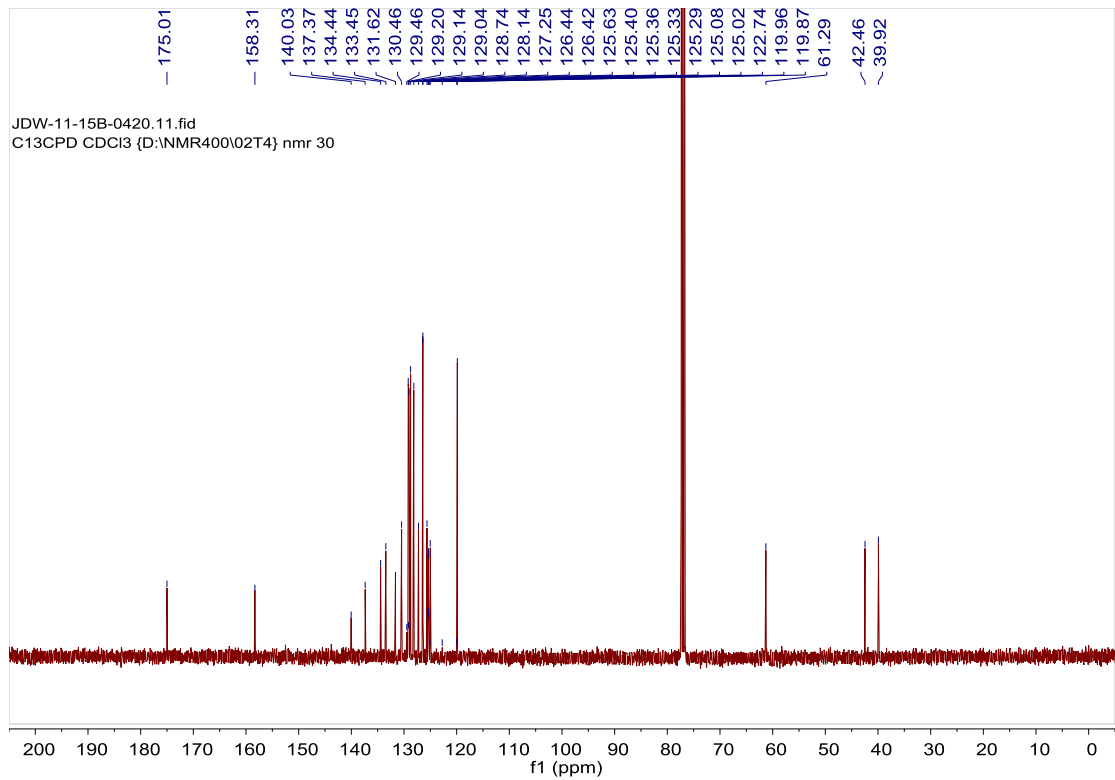

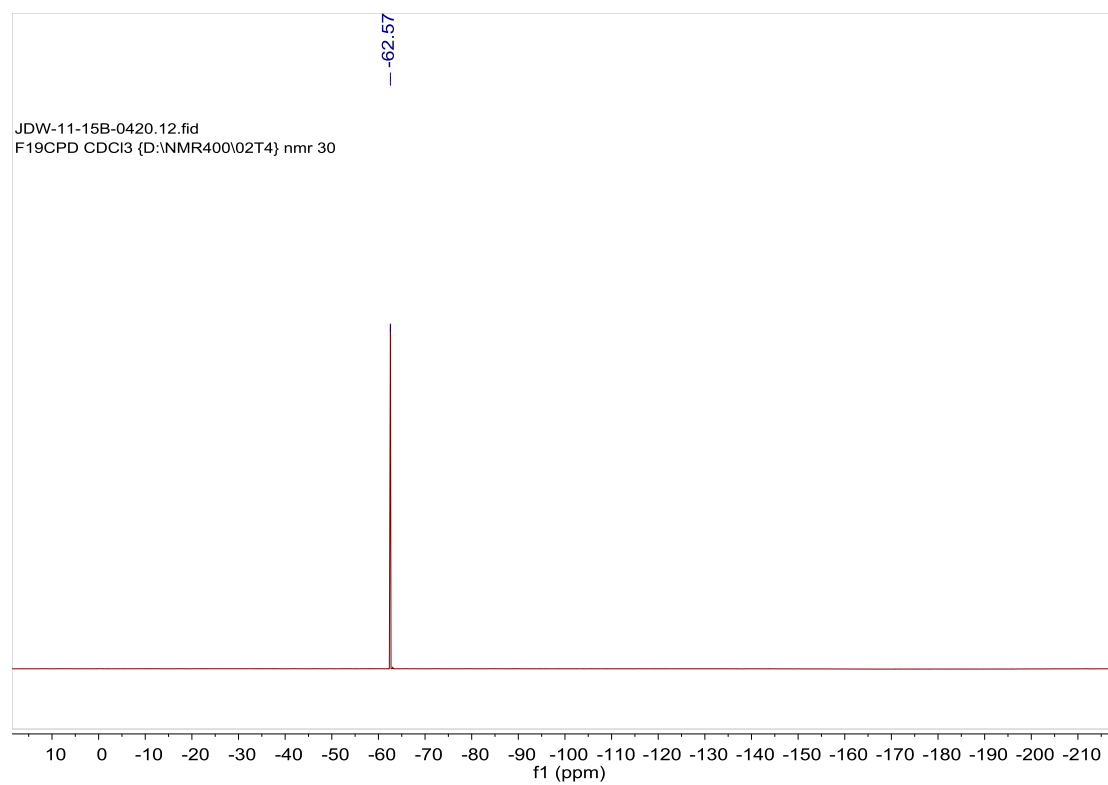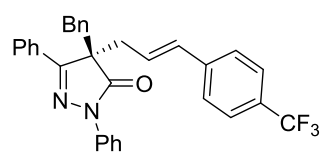

**3s** <sup>19</sup>F NMR (375 MHz, CDCl<sub>3</sub>)

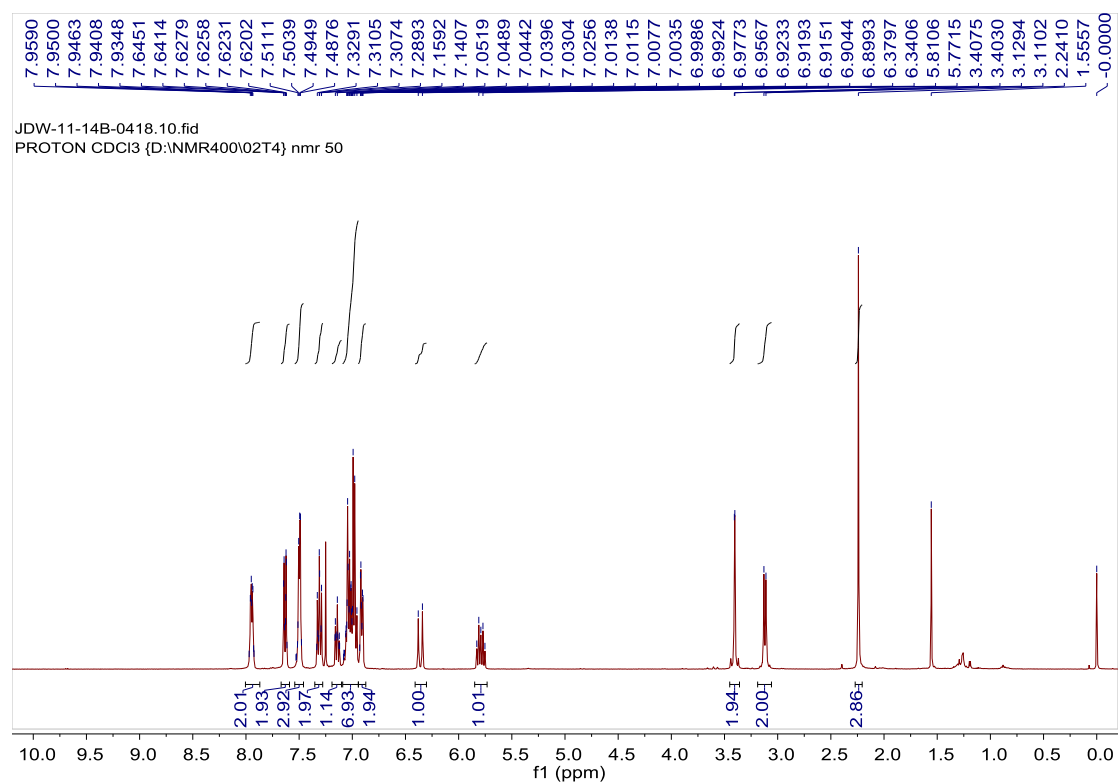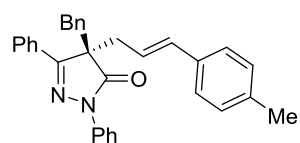

**3t** <sup>1</sup>H NMR (400 MHz, CDCl<sub>3</sub>)  
<sup>13</sup>C NMR (100 MHz, CDCl<sub>3</sub>)

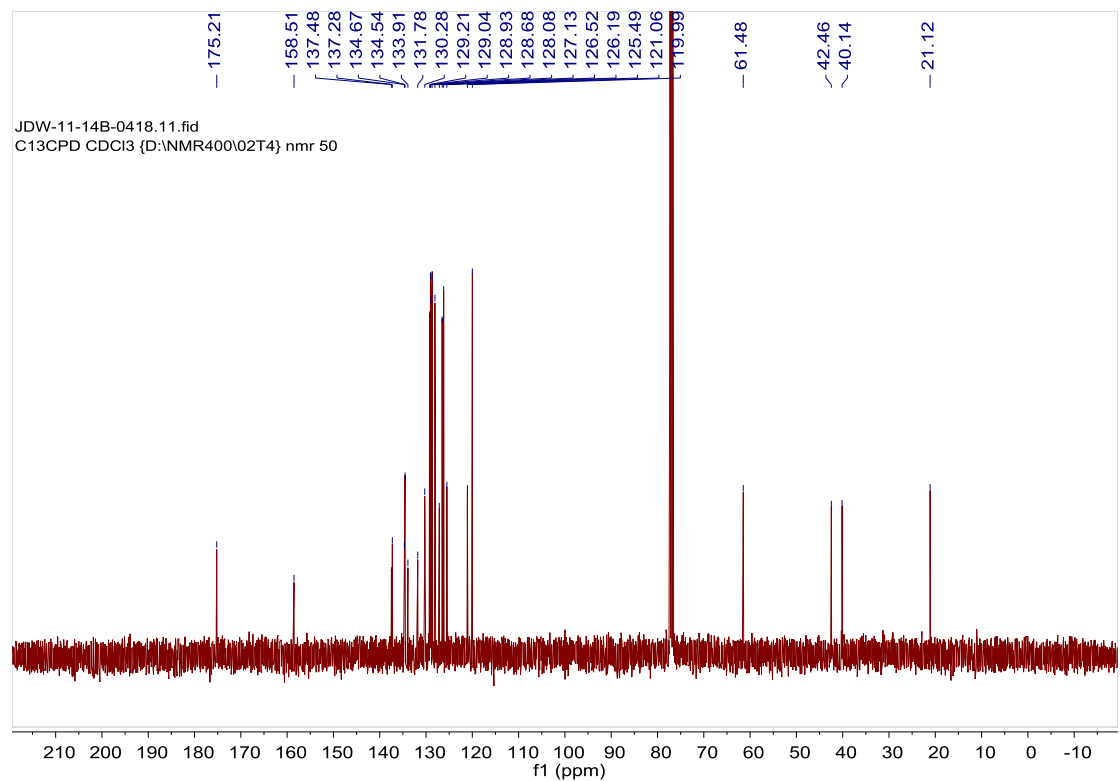

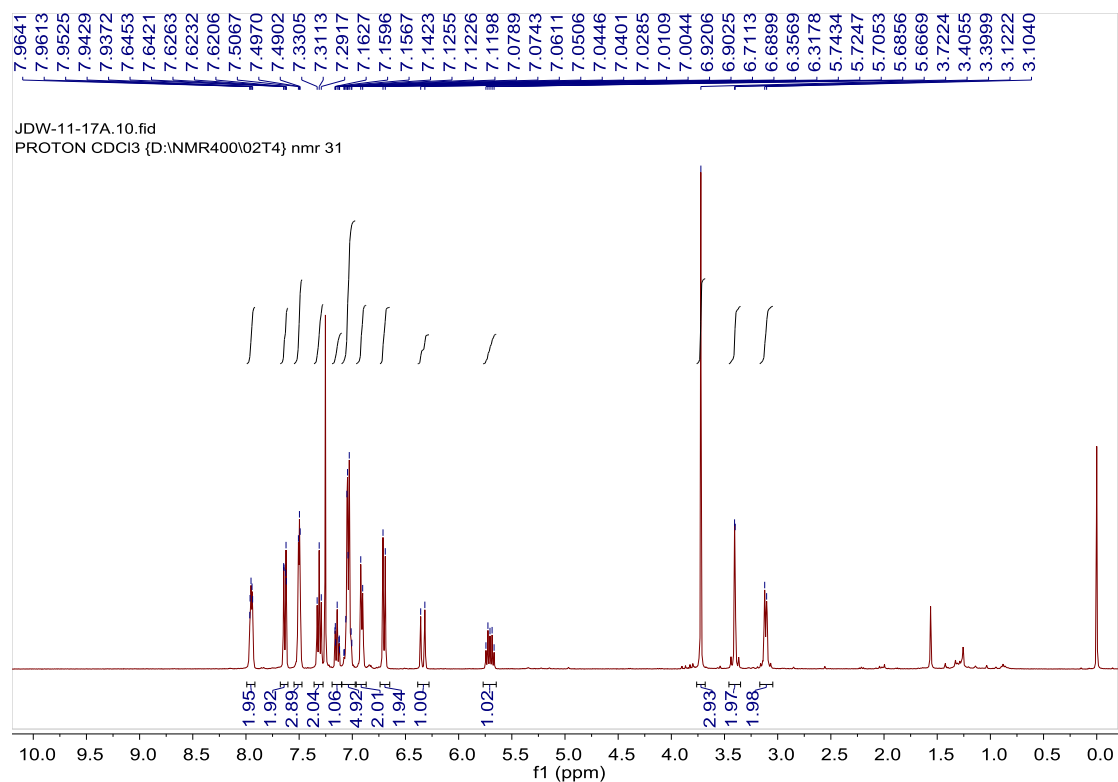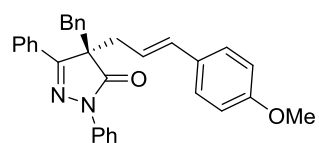

**3u** <sup>1</sup>H NMR (400 MHz, CDCl<sub>3</sub>)  
<sup>13</sup>C NMR (100 MHz, CDCl<sub>3</sub>)

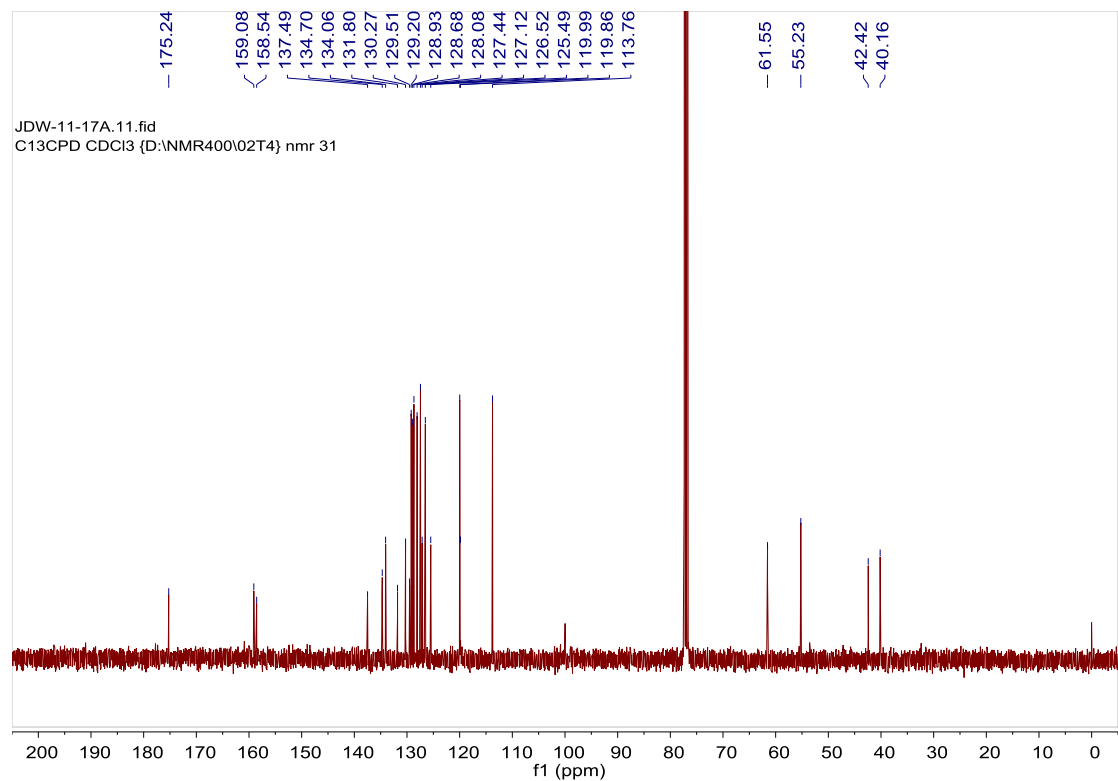





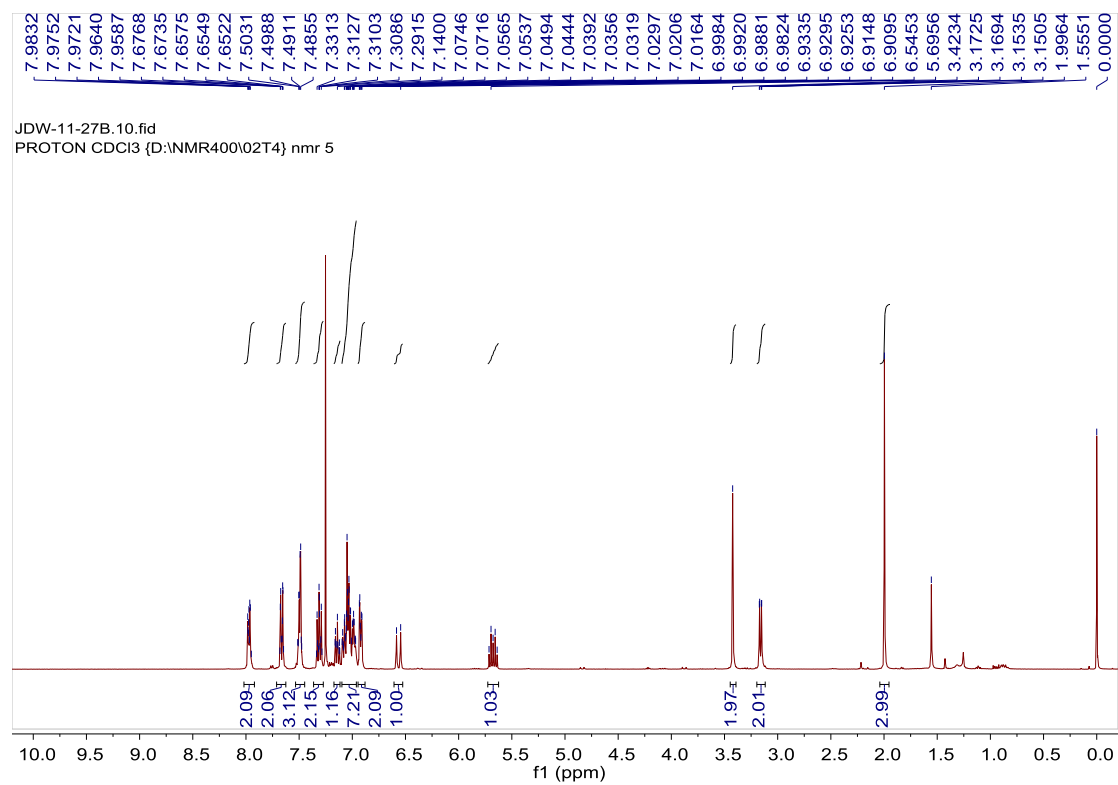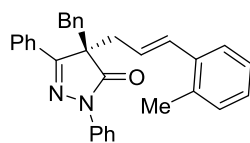

**3w** <sup>1</sup>H NMR (400 MHz, CDCl<sub>3</sub>)

<sup>13</sup>C NMR (100 MHz, CDCl<sub>3</sub>)

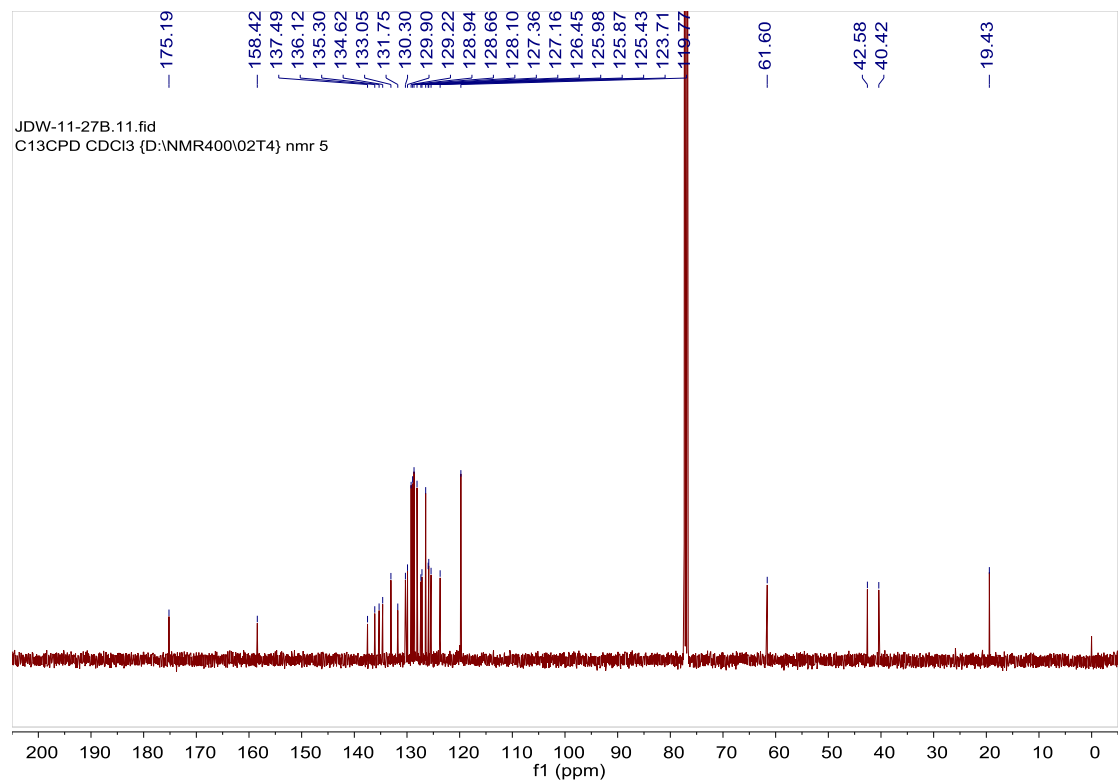

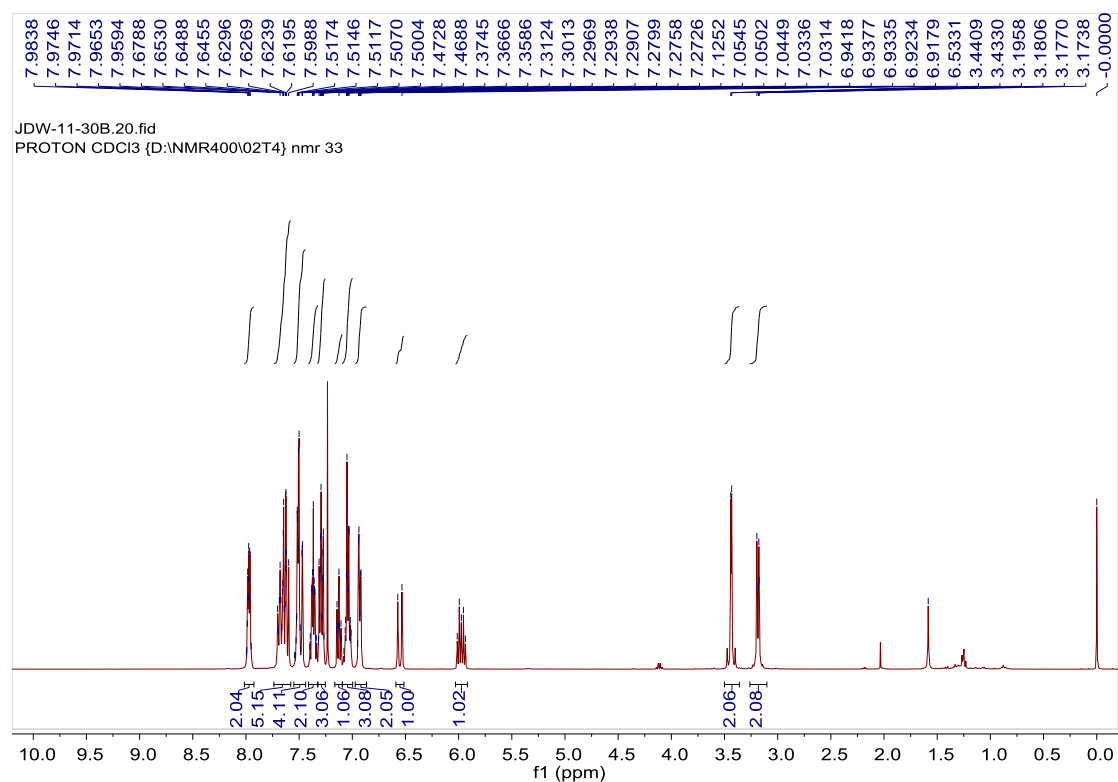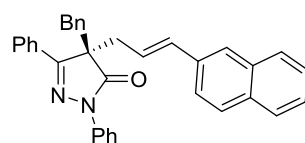

**3x** <sup>1</sup>H NMR (400 MHz, CDCl<sub>3</sub>)

<sup>13</sup>C NMR (100 MHz, CDCl<sub>3</sub>)

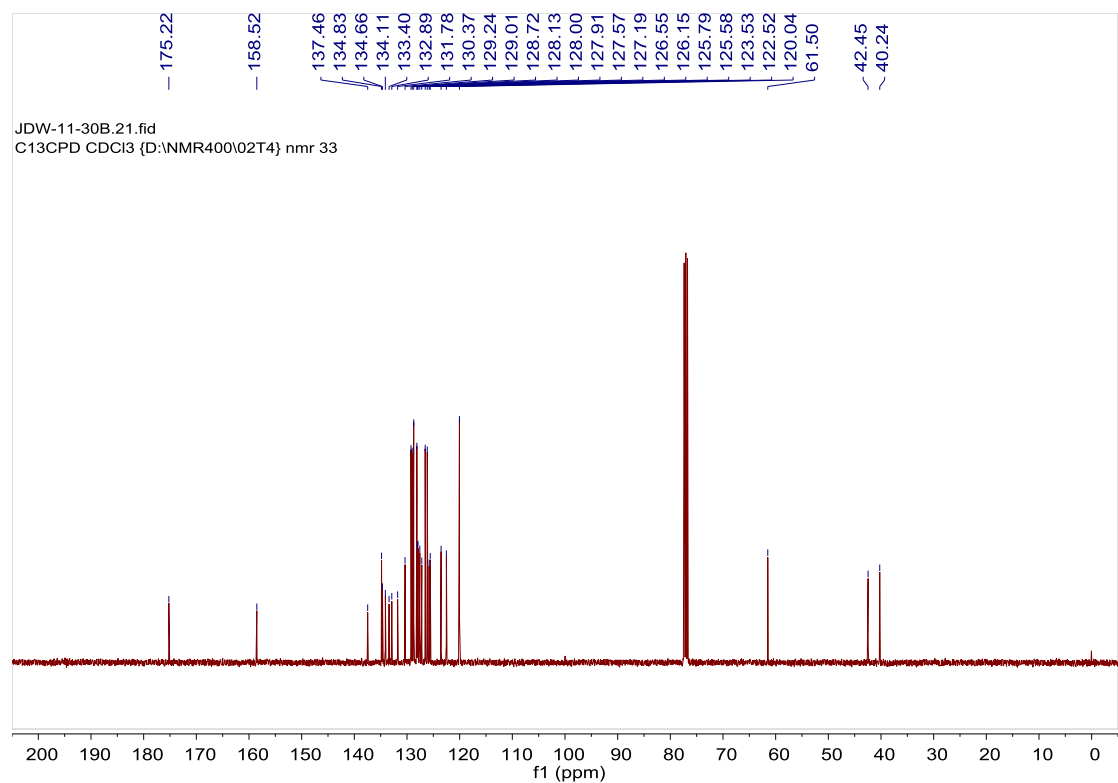

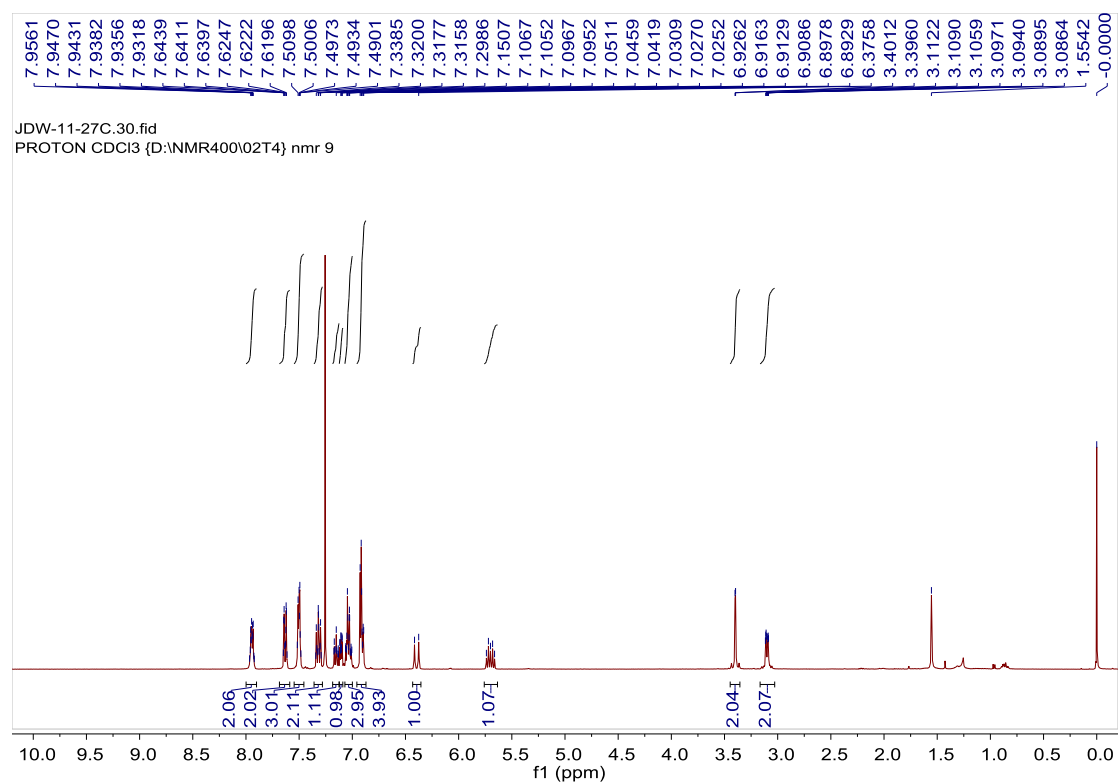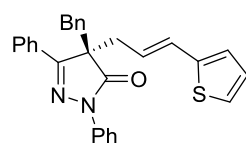

**3y** <sup>1</sup>H NMR (400 MHz, CDCl<sub>3</sub>)  
<sup>13</sup>C NMR (100 MHz, CDCl<sub>3</sub>)

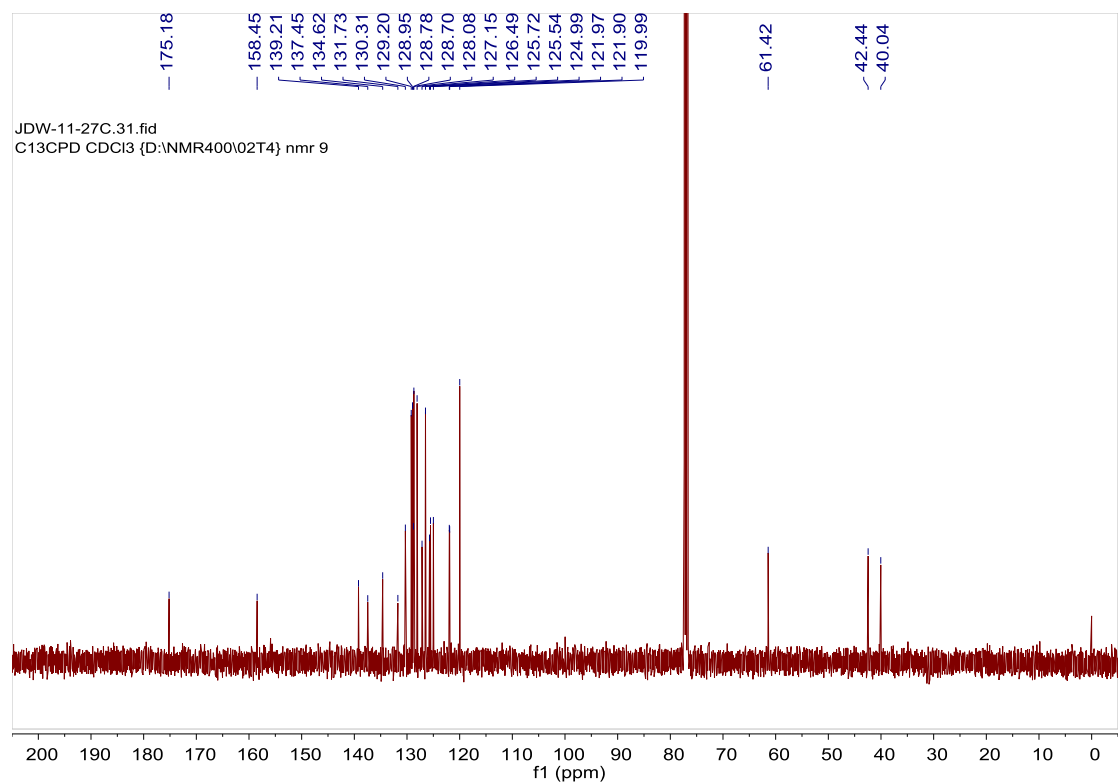

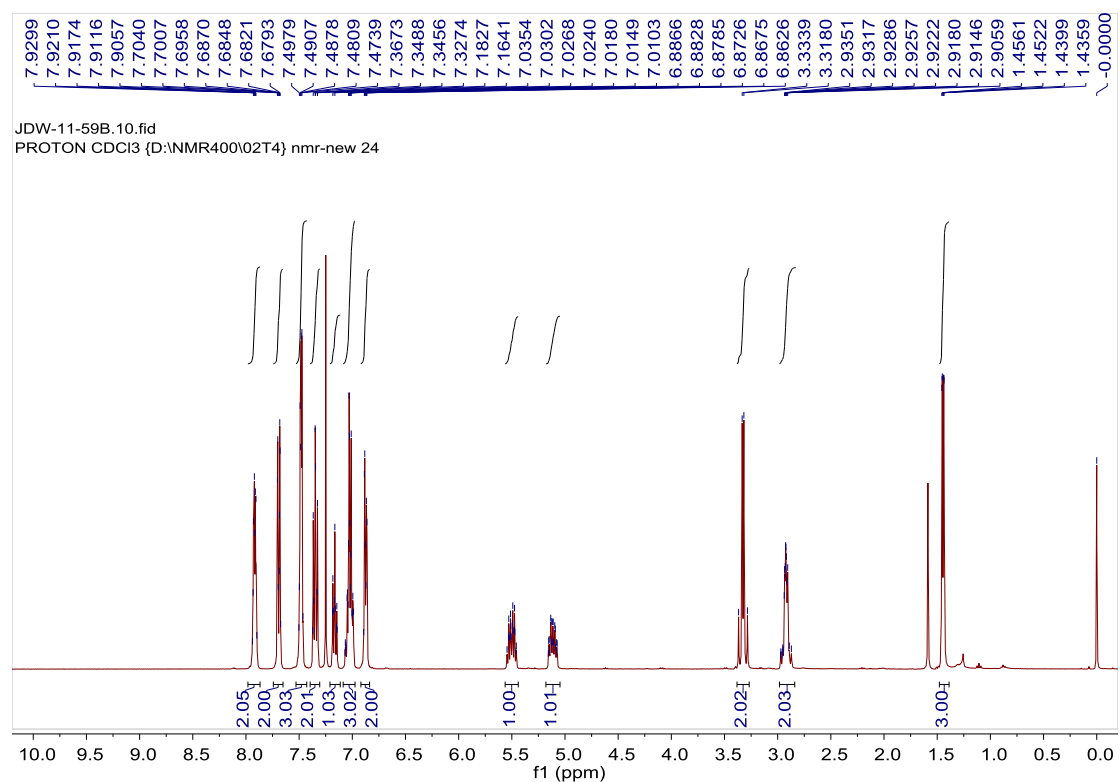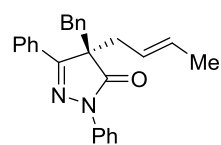

**3z** <sup>1</sup>H NMR (400 MHz, CDCl<sub>3</sub>)

<sup>13</sup>C NMR (100 MHz, CDCl<sub>3</sub>)

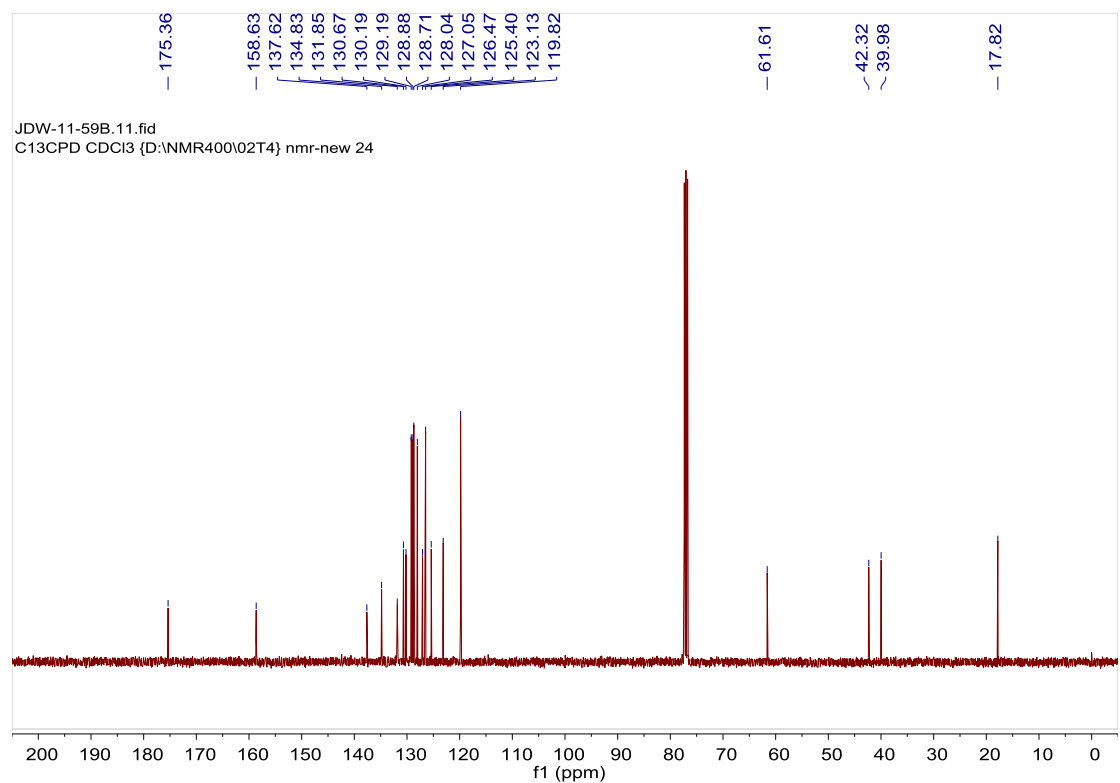

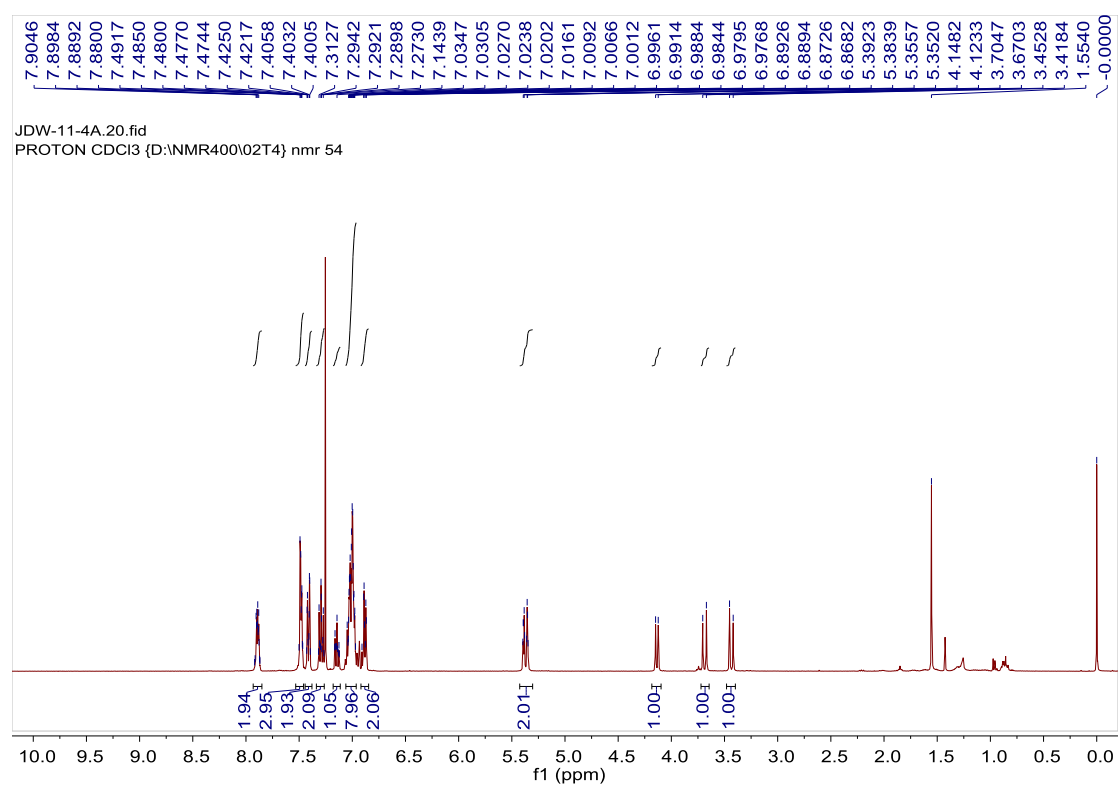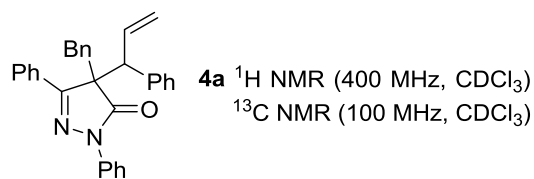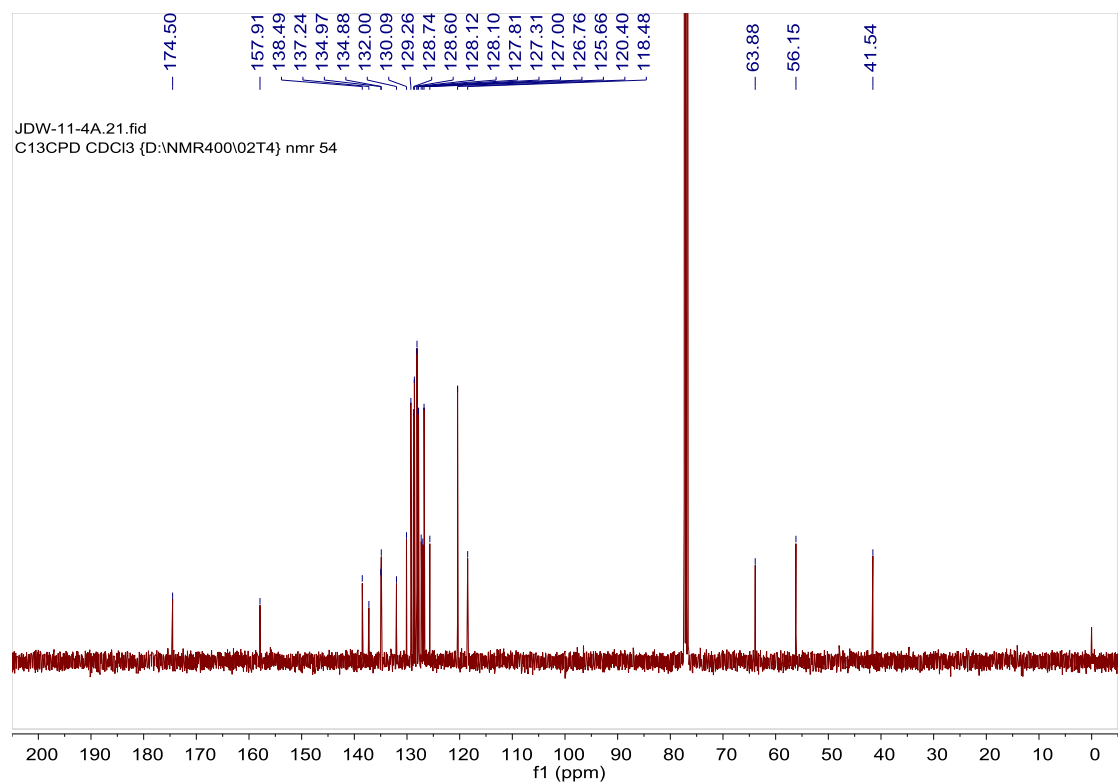

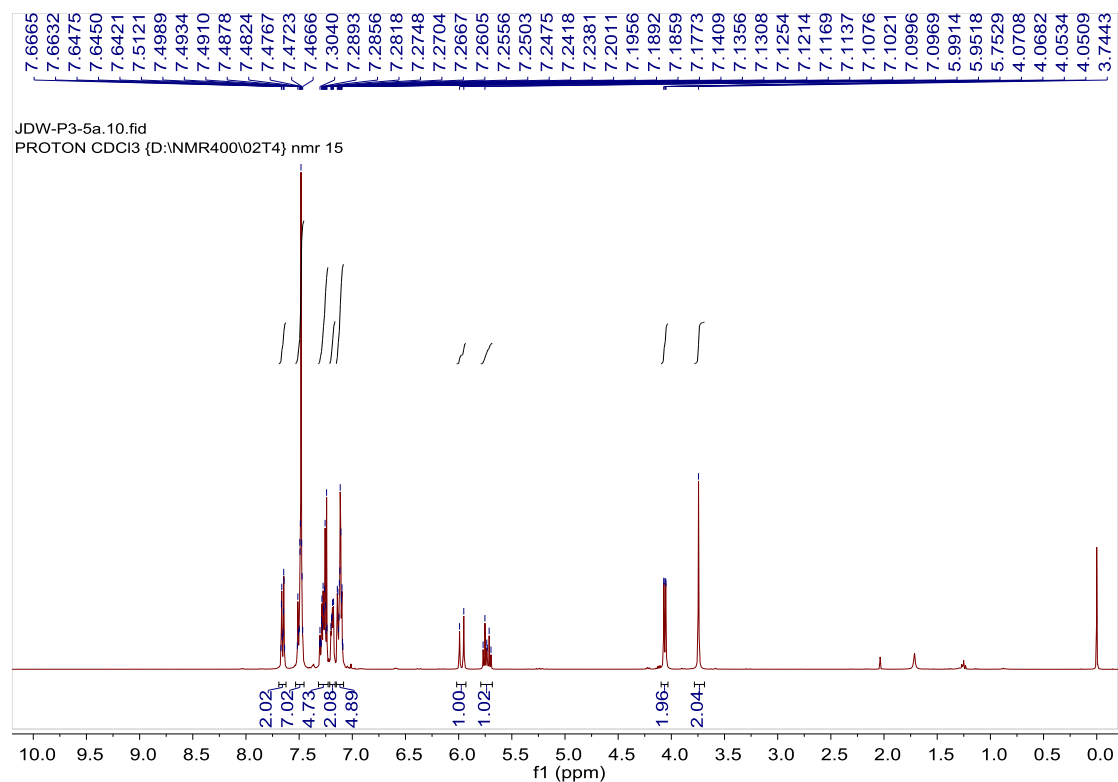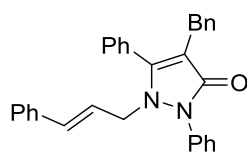

**5a** <sup>1</sup>H NMR (400 MHz, CDCl<sub>3</sub>)  
<sup>13</sup>C NMR (100 MHz, CDCl<sub>3</sub>)

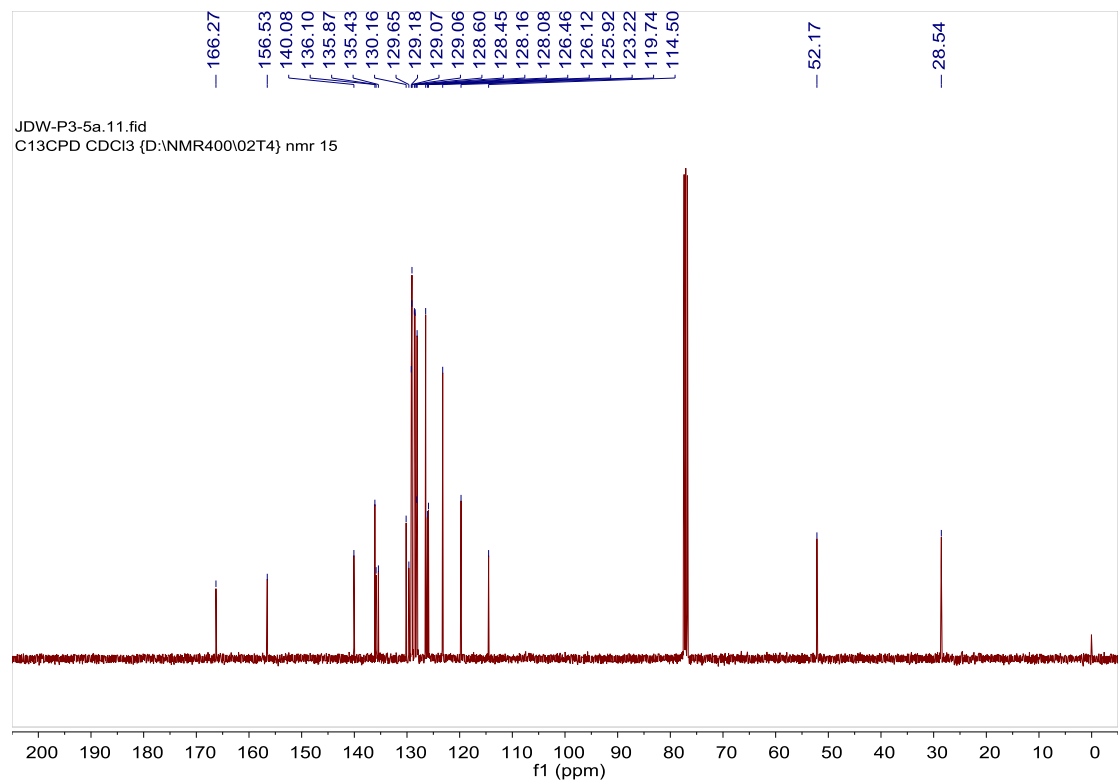

Data File D:\CHEM32\1\DATA\2020\2019001466.D  
Sample Name: JDW-11-14A-rac

```
=====
Acq. Operator   : QLL
Acq. Instrument : Instrument 1          Location : Vial 66
Injection Date  : 5/7/2020 7:45:01 PM
                                           Inj Volume : 5.0 µl

Acq. Method     : D:\CHEM32\1\METHODS\ZCY-0D.M
Last changed    : 5/7/2020 7:59:47 PM by QLL
                  (modified after loading)
Analysis Method : D:\CHEM32\1\METHODS\ZCY-0D.M
Last changed    : 6/2/2020 5:14:47 PM by QLL
                  (modified after loading)
Method Info     : AD-H, Hexane/iPrOH=90/10, 0.8mL/min, 254nm, 30 oC
```

Sample Info : AD-H, Hexane/iPrOH=70/30, 1.0 mL/min, 254nm, 30 oC

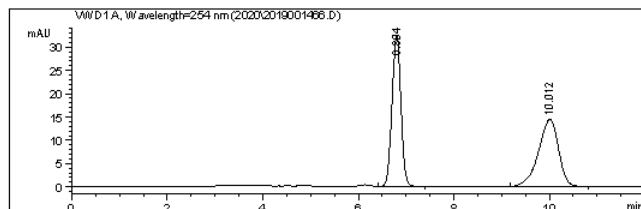

#### Area Percent Report

```
=====
Sorted By      : Signal
Multiplier:    : 1.0000
Dilution:      : 1.0000
Sample Amount: : 1.00000 [ng/ul] (not used in calc.)
Do not use Multiplier & Dilution Factor with ISTDs
```

Signal 1: VWD1 A, Wavelength=254 nm

| Peak # | RetTime [min] | Type | Width [min] | Area mAU  | Height [mAU] | Area %  |
|--------|---------------|------|-------------|-----------|--------------|---------|
| 1      | 6.804         | VB   | 0.2025      | 417.47696 | 32.44875     | 50.0775 |
| 2      | 10.012        | BB   | 0.4388      | 416.18509 | 14.41494     | 49.9225 |

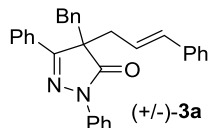

Instrument 1 6/2/2020 5:19:41 PM QLL

Page 1 of 2

Data File D:\CHEM32\1\DATA\2020\2019001467.D  
Sample Name: JDW-11-14A

```
=====
Acq. Operator   : QLL
Acq. Instrument : Instrument 1          Location : Vial 66
Injection Date   : 5/7/2020 8:01:05 PM
                                           Inj Volume : 5.0 µl

Acq. Method     : D:\CHEM32\1\METHODS\ZCY-0D.M
Last changed    : 5/7/2020 8:00:17 PM by QLL
                  (modified after loading)
Analysis Method : D:\CHEM32\1\METHODS\ZCY-0D.M
Last changed    : 6/2/2020 5:14:47 PM by QLL
                  (modified after loading)
Method Info     : AD-H, Hexane/iPrOH=90/10, 0.8mL/min, 254nm, 30 oC
```

Sample Info : AD-H, Hexane/iPrOH=70/30, 1.0 mL/min, 254nm, 30 oC

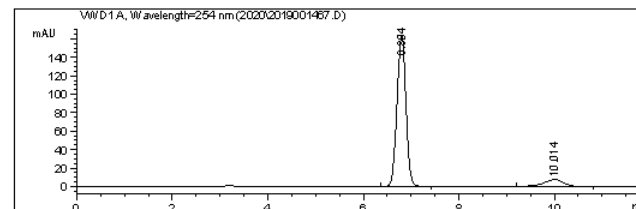

#### Area Percent Report

```
=====
Sorted By      : Signal
Multiplier:    : 1.0000
Dilution:      : 1.0000
Sample Amount: : 1.00000 [ng/ul] (not used in calc.)
Do not use Multiplier & Dilution Factor with ISTDs
```

Signal 1: VWD1 A, Wavelength=254 nm

| Peak # | RetTime [min] | Type | Width [min] | Area mAU   | Height [mAU] | Area %  |
|--------|---------------|------|-------------|------------|--------------|---------|
| 1      | 6.804         | VB   | 0.2030      | 2114.87842 | 163.87845    | 91.0055 |
| 2      | 10.014        | BB   | 0.4422      | 209.02319  | 7.22886      | 8.9945  |

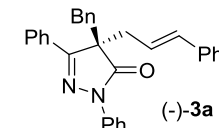

Instrument 1 6/2/2020 5:20:32 PM QLL

Page 1 of 2

Data File D:\CHEM32\1\DATA\2020\2019001420.D  
Sample Name: JDW-11-20A-rac

```
=====
Acq. Operator   : QLL
Acq. Instrument : Instrument 1          Location : Vial 66
Injection Date  : 4/23/2020 2:57:36 PM
                                           Inj Volume : 5.0 µl

Acq. Method     : D:\CHEM32\1\METHODS\ZCY-0D.M
Last changed    : 4/23/2020 3:08:00 PM by QLL
                  (modified after loading)
Analysis Method : D:\CHEM32\1\METHODS\ZCY-0D.M
Last changed    : 6/2/2020 4:44:11 PM by QLL
                  (modified after loading)
Method Info     : AD-H, Hexane/iPrOH=90/10, 0.8mL/min, 254nm, 30 oC
```

Sample Info : AD-H, Hexane/iPrOH=70/30, 1.0mL/min, 254nm, 30 oC

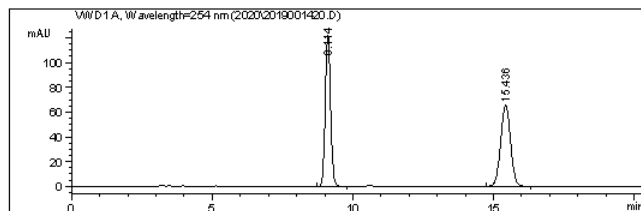

#### Area Percent Report

```
=====
Sorted By      :      Signal
Multiplier:    :      1.0000
Dilution:      :      1.0000
Sample Amount: :      1.00000 [ng/ul] (not used in calc.)
Do not use Multiplier & Dilution Factor with ISTDs
```

Signal 1: VWD1 A, Wavelength=254 nm

| Peak # | RetTime [min] | Type | Width [min] | Area mAU   | Height [mAU] | Area %  |
|--------|---------------|------|-------------|------------|--------------|---------|
| 1      | 9.114         | VB   | 0.2055      | 1597.47607 | 121.77871    | 50.0715 |
| 2      | 15.436        | BB   | 0.3807      | 1592.91614 | 65.30258     | 49.9285 |

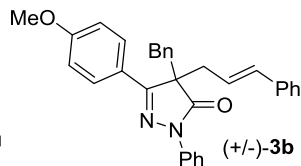

Instrument 1 6/2/2020 4:48:44 PM QLL

Page 1 of 2

Data File D:\CHEM32\1\DATA\2020\2019001421.D  
Sample Name: JDW-11-20A

```
=====
Acq. Operator   : QLL
Acq. Instrument : Instrument 1          Location : Vial 66
Injection Date   : 4/23/2020 3:19:37 PM
                                           Inj Volume : 5.0 µl

Acq. Method     : D:\CHEM32\1\METHODS\ZCY-0D.M
Last changed    : 4/23/2020 3:17:59 PM by QLL
                  (modified after loading)
Analysis Method : D:\CHEM32\1\METHODS\ZCY-0D.M
Last changed    : 6/2/2020 4:44:11 PM by QLL
                  (modified after loading)
Method Info     : AD-H, Hexane/iPrOH=90/10, 0.8mL/min, 254nm, 30 oC
```

Sample Info : AD-H, Hexane/iPrOH=70/30, 1.0mL/min, 254nm, 30 oC

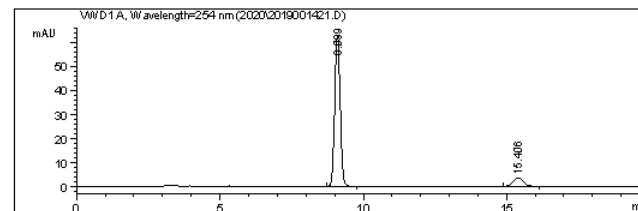

#### Area Percent Report

```
=====
Sorted By      :      Signal
Multiplier:    :      1.0000
Dilution:      :      1.0000
Sample Amount: :      1.00000 [ng/ul] (not used in calc.)
Do not use Multiplier & Dilution Factor with ISTDs
```

Signal 1: VWD1 A, Wavelength=254 nm

| Peak # | RetTime [min] | Type | Width [min] | Area mAU  | Height [mAU] | Area %  |
|--------|---------------|------|-------------|-----------|--------------|---------|
| 1      | 9.099         | VB   | 0.2022      | 820.10297 | 62.66747     | 90.8457 |
| 2      | 15.406        | BB   | 0.3788      | 82.63938  | 3.41017      | 9.1543  |

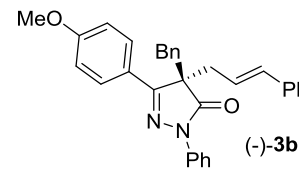

Page 1 of 2



Data File D:\CHEM32\1\DATA\2020\2019001426.D  
Sample Name: JDW-11-20B-rac

```

=====
Acq. Operator   : QLL
Acq. Instrument : Instrument 1          Location : Vial 66
Injection Date  : 4/24/2020 4:34:33 PM
                                           Inj Volume : 5.0 µl

Acq. Method     : D:\CHEM32\1\METHODS\ZCY-0D.M
Last changed    : 4/24/2020 11:22:38 AM by QLL
                  (modified after loading)
Analysis Method : D:\CHEM32\1\METHODS\ZCY-0D.M
Last changed    : 6/2/2020 4:51:15 PM by QLL
                  (modified after loading)
Method Info     : AD-H, Hexane/iPrOH=90/10, 0.8mL/min, 254nm, 30 oC

```

Sample Info : AD-H, Hexane/iPrOH=70/30, 1.0mL/min, 254nm, 30 oC

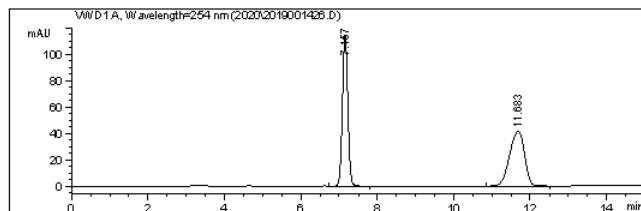

#### Area Percent Report

```

=====
Sorted By      :      Signal
Multiplier:    :      1.0000
Dilution:      :      1.0000
Sample Amount: :      1.00000 [ng/ul] (not used in calc.)
Do not use Multiplier & Dilution Factor with ISTDs

```

Signal 1: VWD1 A, Wavelength=254 nm

| Peak # | RetTime [min] | Type | Width [min] | Area mAU   | Height [mAU] | Area %  |
|--------|---------------|------|-------------|------------|--------------|---------|
| 1      | 7.157         | VB   | 0.1529      | 1128.05884 | 114.44363    | 50.2096 |
| 2      | 11.683        | BB   | 0.4374      | 1118.64270 | 41.41285     | 49.7904 |

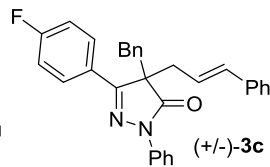

Instrument 1 6/2/2020 4:53:28 PM QLL

Page 1 of 2

Data File D:\CHEM32\1\DATA\2020\2019001427.D  
Sample Name: JDW-11-20B

```

=====
Acq. Operator   : QLL
Acq. Instrument : Instrument 1          Location : Vial 66
Injection Date   : 4/24/2020 5:42:04 PM
                                           Inj Volume : 5.0 µl

Acq. Method     : D:\CHEM32\1\METHODS\ZCY-0D.M
Last changed    : 4/24/2020 4:51:49 PM by QLL
                  (modified after loading)
Analysis Method : D:\CHEM32\1\METHODS\ZCY-0D.M
Last changed    : 6/2/2020 4:51:15 PM by QLL
                  (modified after loading)
Method Info     : AD-H, Hexane/iPrOH=90/10, 0.8mL/min, 254nm, 30 oC

```

Sample Info : AD-H, Hexane/iPrOH=70/30, 1.0mL/min, 254nm, 30 oC

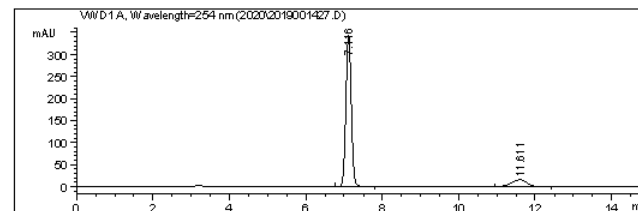

#### Area Percent Report

```

=====
Sorted By      :      Signal
Multiplier:    :      1.0000
Dilution:      :      1.0000
Sample Amount: :      1.00000 [ng/ul] (not used in calc.)
Do not use Multiplier & Dilution Factor with ISTDs

```

Signal 1: VWD1 A, Wavelength=254 nm

| Peak # | RetTime [min] | Type | Width [min] | Area mAU   | Height [mAU] | Area %  |
|--------|---------------|------|-------------|------------|--------------|---------|
| 1      | 7.116         | BB   | 0.1514      | 3337.09277 | 342.73923    | 89.4173 |
| 2      | 11.611        | BB   | 0.4373      | 394.95132  | 14.62926     | 10.5827 |

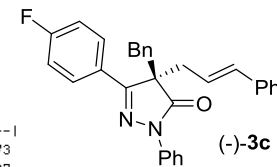

Instrument 1 6/2/2020 4:54:45 PM QLL

Page 1 of 2

Data File D:\CHEM32\1\DATA\2020\2019001423.D  
Sample Name: JDW-11-20C-rac

=====

|                 |                                                     |                     |
|-----------------|-----------------------------------------------------|---------------------|
| Acq. Operator   | : QLL                                               |                     |
| Acq. Instrument | : Instrument 1                                      | Location : Vial 66  |
| Injection Date  | : 4/23/2020 4:11:31 PM                              |                     |
|                 |                                                     | Inj Volume : 5.0 µl |
| Acq. Method     | : D:\CHEM32\1\METHODS\ZCY-0D.M                      |                     |
| Last changed    | : 4/23/2020 4:10:16 PM by QLL                       |                     |
|                 | (modified after loading)                            |                     |
| Analysis Method | : D:\CHEM32\1\METHODS\ZCY-0D.M                      |                     |
| Last changed    | : 6/2/2020 4:51:15 PM by QLL                        |                     |
|                 | (modified after loading)                            |                     |
| Method Info     | : AD-H, Hexane/iPrOH=90/10, 0.8mL/min, 254nm, 30 oC |                     |

Sample Info : AD-H, Hexane/iPrOH=70/30, 1.0mL/min, 254nm, 30 oC

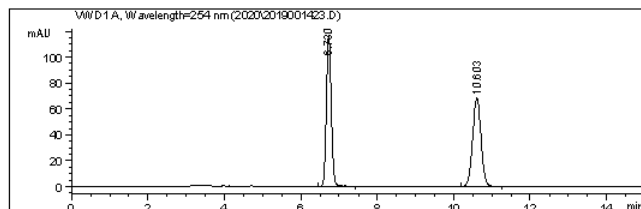

Area Percent Report

Sorted By : Signal

|                |                                       |
|----------------|---------------------------------------|
| Multiplier:    | : 1.0000                              |
| Dilution:      | : 1.0000                              |
| Sample Amount: | : 1.00000 [ng/ul] (not used in calc.) |

Do not use Multiplier & Dilution Factor with ISTDs

Signal 1: WVD1 A, Wavelength=254 nm

| Peak # | RetTime [min] | Type | Width [min] | Area mAU   | Height [mAU] | Area %  |
|--------|---------------|------|-------------|------------|--------------|---------|
| 1      | 6.730         | VB   | 0.1416      | 1037.06750 | 116.60235    | 50.1194 |
| 2      | 10.603        | BB   | 0.2379      | 1032.12622 | 68.11770     | 49.8806 |

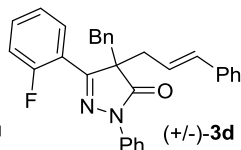

Instrument 1 6/2/2020 4:51:25 PM QLL

Page 1 of 2

Data File D:\CHEM32\1\DATA\2020\2019001424.D  
Sample Name: JDW-11-20C

=====

|                 |                                                     |                     |
|-----------------|-----------------------------------------------------|---------------------|
| Acq. Operator   | : QLL                                               |                     |
| Acq. Instrument | : Instrument 1                                      | Location : Vial 66  |
| Injection Date  | : 4/23/2020 4:31:23 PM                              |                     |
|                 |                                                     | Inj Volume : 5.0 µl |
| Acq. Method     | : D:\CHEM32\1\METHODS\ZCY-0D.M                      |                     |
| Last changed    | : 4/23/2020 4:26:30 PM by QLL                       |                     |
|                 | (modified after loading)                            |                     |
| Analysis Method | : D:\CHEM32\1\METHODS\ZCY-0D.M                      |                     |
| Last changed    | : 6/2/2020 4:51:15 PM by QLL                        |                     |
|                 | (modified after loading)                            |                     |
| Method Info     | : AD-H, Hexane/iPrOH=90/10, 0.8mL/min, 254nm, 30 oC |                     |

Sample Info : AD-H, Hexane/iPrOH=70/30, 1.0mL/min, 254nm, 30 oC

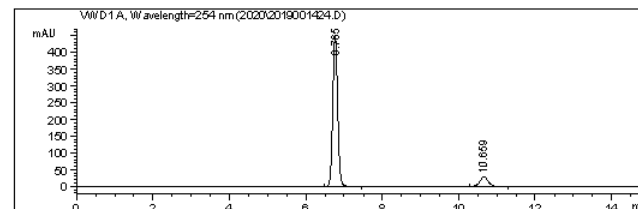

Area Percent Report

Sorted By : Signal

|                |                                       |
|----------------|---------------------------------------|
| Multiplier:    | : 1.0000                              |
| Dilution:      | : 1.0000                              |
| Sample Amount: | : 1.00000 [ng/ul] (not used in calc.) |

Do not use Multiplier & Dilution Factor with ISTDs

Signal 1: WVD1 A, Wavelength=254 nm

| Peak # | RetTime [min] | Type | Width [min] | Area mAU   | Height [mAU] | Area %  |
|--------|---------------|------|-------------|------------|--------------|---------|
| 1      | 6.765         | VV   | 0.1385      | 3996.94043 | 450.10538    | 90.3073 |
| 2      | 10.659        | BB   | 0.2387      | 428.99088  | 28.18797     | 9.6927  |

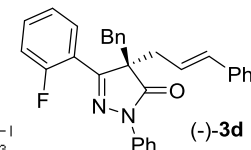

Data File D:\CHEM32\1\DATA\2020\2019001449.D  
 Sample Name: JDW-11-25A-rac

=====

Acq. Operator : QLL  
 Acq. Instrument : Instrument 1 Location : Vial 66  
 Injection Date : 4/28/2020 10:25:34 AM Inj Volume : 5.0 µl

Acq. Method : D:\CHEM32\1\METHODS\ZCY-0D.M  
 Last changed : 4/28/2020 10:41:40 AM by QLL  
 (modified after loading)

Analysis Method : D:\CHEM32\1\METHODS\ZCY-0D.M  
 Last changed : 6/2/2020 5:05:53 PM by QLL  
 (modified after loading)

Method Info : AD-H, Hexane/iPrOH=90/10, 0.8mL/min, 254nm, 30 oC

Sample Info : AD-H, Hexane/iPrOH=70/30, 1.0 mL/min, 254nm, 30 oC

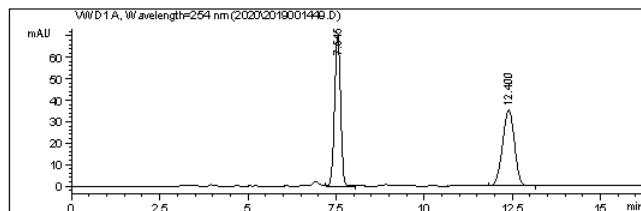

Area Percent Report

Sorted By : Signal  
 Multiplier: : 1.0000  
 Dilution: : 1.0000  
 Sample Amount: : 1.00000 [ng/ul] (not used in calc.)  
 Do not use Multiplier & Dilution Factor with ISTDs

Signal 1: VWD1 A, Wavelength=254 nm

| Peak # | RetTime [min] | Type | Width [min] | Area mAU *s | Height [mAU] | Area %  |
|--------|---------------|------|-------------|-------------|--------------|---------|
| 1      | 7.545         | VV   | 0.1877      | 833.30817   | 70.37051     | 50.1716 |
| 2      | 12.400        | BB   | 0.3679      | 827.60632   | 35.52230     | 49.8284 |

Instrument 1 6/2/2020 5:06:01 PM QLL

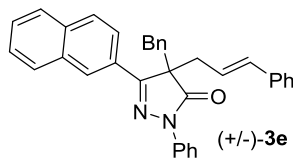

Page 1 of 2

Data File D:\CHEM32\1\DATA\2020\2019001450.D  
 Sample Name: JDW-11-25A

=====

Acq. Operator : QLL  
 Acq. Instrument : Instrument 1 Location : Vial 66  
 Injection Date : 4/28/2020 10:43:01 AM Inj Volume : 5.0 µl

Acq. Method : D:\CHEM32\1\METHODS\ZCY-0D.M  
 Last changed : 4/28/2020 10:41:56 AM by QLL  
 (modified after loading)

Analysis Method : D:\CHEM32\1\METHODS\ZCY-0D.M  
 Last changed : 6/2/2020 5:05:53 PM by QLL  
 (modified after loading)

Method Info : AD-H, Hexane/iPrOH=90/10, 0.8mL/min, 254nm, 30 oC

Sample Info : AD-H, Hexane/iPrOH=70/30, 1.0 mL/min, 254nm, 30 oC

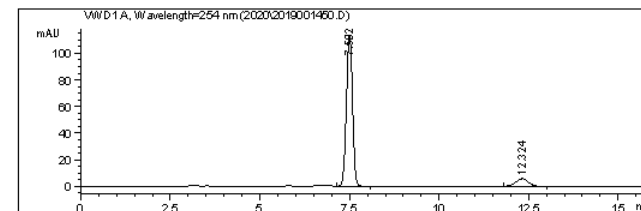

Area Percent Report

Sorted By : Signal  
 Multiplier: : 1.0000  
 Dilution: : 1.0000  
 Sample Amount: : 1.00000 [ng/ul] (not used in calc.)  
 Do not use Multiplier & Dilution Factor with ISTDs

Signal 1: VWD1 A, Wavelength=254 nm

| Peak # | RetTime [min] | Type | Width [min] | Area mAU *s | Height [mAU] | Area %  |
|--------|---------------|------|-------------|-------------|--------------|---------|
| 1      | 7.502         | VB   | 0.1832      | 1326.53796  | 113.25499    | 90.9522 |
| 2      | 12.324        | BB   | 0.3683      | 131.96228   | 5.65641      | 9.0478  |

Instrument 1 6/2/2020 5:06:58 PM QLL

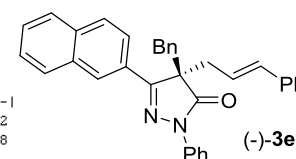

Page 1 of 2

Data File D:\CHEM32\1\DATA\2020\2019001511.D  
 Sample Name: JDW-11-29A-rac

=====

Acq. Operator : QLL  
 Acq. Instrument : Instrument 1 Location : Vial 66  
 Injection Date : 5/18/2020 8:24:48 PM  
 Inj Volume : 5.0 µl

Acq. Method : D:\CHEM32\1\METHODS\ZCY-0D.M  
 Last changed : 5/18/2020 8:33:33 PM by QLL  
 (modified after loading)

Analysis Method : D:\CHEM32\1\METHODS\ZCY-0D.M  
 Last changed : 6/2/2020 5:37:11 PM by QLL  
 (modified after loading)

Method Info : AD-H, Hexane/iPrOH=90/10, 0.8mL/min, 254nm, 30 oC

Sample Info : AD, Hexane/iPrOH=70/30, 1.0 mL/min, 254nm, 30 oC

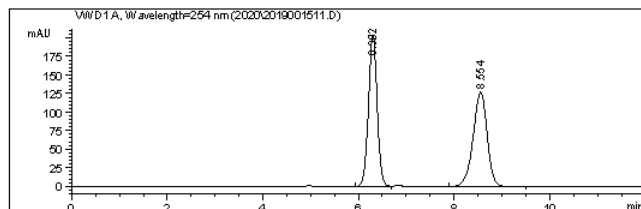

Area Percent Report

Sorted By : Signal  
 Multiplier: : 1.0000  
 Dilution: : 1.0000  
 Sample Amount: : 1.00000 [ng/ul] (not used in calc.)  
 Do not use Multiplier & Dilution Factor with ISTDs

Signal 1: VWD1 A, Wavelength=254 nm

| Peak # | RetTime [min] | Type | Width [min] | Area mAU   | Area %  | Height [mAU] |
|--------|---------------|------|-------------|------------|---------|--------------|
| 1      | 6.302         | VV   | 0.1972      | 2576.02100 | 49.9312 | 203.44957    |
| 2      | 8.554         | VB   | 0.3132      | 2583.12402 | 50.0688 | 126.87862    |

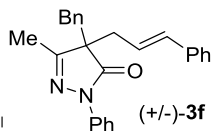

Instrument 1 6/2/2020 5:37:18 PM QLL

Page 1 of 2

Data File D:\CHEM32\1\DATA\2020\2019001512.D  
 Sample Name: JDW-11-29A

=====

Acq. Operator : QLL  
 Acq. Instrument : Instrument 1 Location : Vial 66  
 Injection Date : 5/18/2020 8:47:48 PM  
 Inj Volume : 5.0 µl

Acq. Method : D:\CHEM32\1\METHODS\ZCY-0D.M  
 Last changed : 5/18/2020 8:36:52 PM by QLL  
 (modified after loading)

Analysis Method : D:\CHEM32\1\METHODS\ZCY-0D.M  
 Last changed : 6/2/2020 5:37:11 PM by QLL  
 (modified after loading)

Method Info : AD-H, Hexane/iPrOH=90/10, 0.8mL/min, 254nm, 30 oC

Sample Info : AD, Hexane/iPrOH=70/30, 1.0 mL/min, 254nm, 30 oC

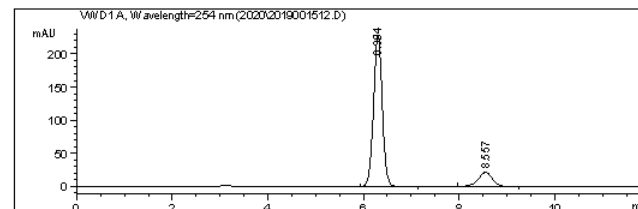

Area Percent Report

Sorted By : Signal  
 Multiplier: : 1.0000  
 Dilution: : 1.0000  
 Sample Amount: : 1.00000 [ng/ul] (not used in calc.)  
 Do not use Multiplier & Dilution Factor with ISTDs

Signal 1: VWD1 A, Wavelength=254 nm

| Peak # | RetTime [min] | Type | Width [min] | Area mAU   | Area %  | Height [mAU] |
|--------|---------------|------|-------------|------------|---------|--------------|
| 1      | 6.304         | BB   | 0.1974      | 2893.93213 | 87.0551 | 228.27159    |
| 2      | 8.557         | BB   | 0.3156      | 430.32187  | 12.9449 | 21.18283     |

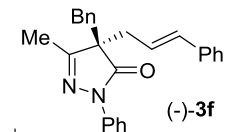

Instrument 1 6/2/2020 5:37:58 PM QLL

Page 1 of 2

Data File D:\CHEM32\1\DATA\2020\2019001474.D  
Sample Name: JDW-11-23C-rac

=====

Acq. Operator : QLL  
Acq. Instrument : Instrument 1 Location : Vial 66  
Injection Date : 5/9/2020 4:39:40 PM Inj Volume : 5.0 µl

Acq. Method : D:\CHEM32\1\METHODS\ZCY-OD.M  
Last changed : 5/9/2020 4:44:53 PM by QLL  
(modified after loading)

Analysis Method : D:\CHEM32\1\METHODS\ZCY-OD.M  
Last changed : 6/2/2020 5:22:46 PM by QLL  
(modified after loading)

Method Info : AD-H, Hexane/iPrOH=90/10, 0.8mL/min, 254nm, 30 oC

Sample Info : OD-H, Hexane/iPrOH=85/15, 1.0 mL/min, 254nm, 30 oC

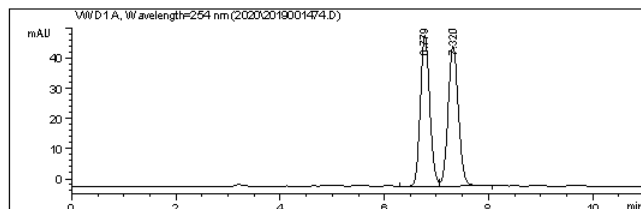

Area Percent Report

Sorted By : Signal  
Multiplier: : 1.0000  
Dilution: : 1.0000  
Sample Amount: : 1.00000 [ng/ul] (not used in calc.)  
Do not use Multiplier & Dilution Factor with ISTDs

Signal 1: VWD1 A, Wavelength=254 nm

| Peak # | RetTime [min] | Type | Width [min] | Area mAU  | Height [mAU] | Area %  |
|--------|---------------|------|-------------|-----------|--------------|---------|
| 1      | 6.779         | VV   | 0.1959      | 626.76605 | 49.95442     | 49.6145 |
| 2      | 7.320         | VB   | 0.2158      | 636.50562 | 46.28252     | 50.3855 |

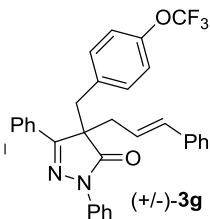

Instrument 1 6/2/2020 5:23:09 PM QLL

Page 1 of 2

Data File D:\CHEM32\1\DATA\2020\2019001475.D  
Sample Name: JDW-11-23C

=====

Acq. Operator : QLL  
Acq. Instrument : Instrument 1 Location : Vial 66  
Injection Date : 5/9/2020 4:55:23 PM Inj Volume : 5.0 µl

Acq. Method : D:\CHEM32\1\METHODS\ZCY-OD.M  
Last changed : 5/9/2020 4:54:23 PM by QLL  
(modified after loading)

Analysis Method : D:\CHEM32\1\METHODS\ZCY-OD.M  
Last changed : 6/2/2020 5:22:46 PM by QLL  
(modified after loading)

Method Info : AD-H, Hexane/iPrOH=90/10, 0.8mL/min, 254nm, 30 oC

Sample Info : OD-H, Hexane/iPrOH=85/15, 1.0 mL/min, 254nm, 30 oC

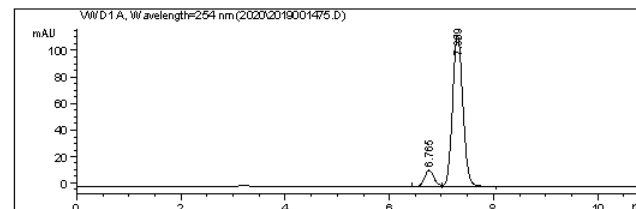

Area Percent Report

Sorted By : Signal  
Multiplier: : 1.0000  
Dilution: : 1.0000  
Sample Amount: : 1.00000 [ng/ul] (not used in calc.)  
Do not use Multiplier & Dilution Factor with ISTDs

Signal 1: VWD1 A, Wavelength=254 nm

| Peak # | RetTime [min] | Type | Width [min] | Area mAU   | Height [mAU] | Area %  |
|--------|---------------|------|-------------|------------|--------------|---------|
| 1      | 6.765         | VV   | 0.1959      | 151.98193  | 12.11373     | 8.8203  |
| 2      | 7.309         | VB   | 0.2161      | 1571.10474 | 114.01720    | 91.1797 |

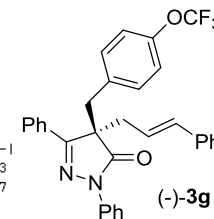

Instrument 1 6/2/2020 5:25:09 PM QLL

Page 1 of 2

Data File D:\CHEM32\1\DATA\2020\2019001472.D  
Sample Name: JDW-11-23A-rac

=====

Acq. Operator : QLL  
Acq. Instrument : Instrument 1 Location : Vial 66  
Injection Date : 5/9/2020 3:33:26 PM Inj Volume : 5.0 µl

Acq. Method : D:\CHEM32\1\METHODS\ZCY-OD.M  
Last changed : 5/9/2020 3:42:49 PM by QLL  
(modified after loading)

Analysis Method : D:\CHEM32\1\METHODS\ZCY-OD.M  
Last changed : 6/2/2020 5:14:47 PM by QLL  
(modified after loading)

Method Info : AD-H, Hexane/iPrOH=90/10, 0.8mL/min, 254nm, 30 oC

Sample Info : OD-H, Hexane/iPrOH=85/15, 1.0 mL/min, 254nm, 30 oC

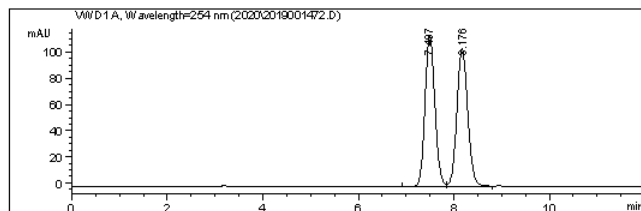

Area Percent Report

Sorted By : Signal  
Multiplier: : 1.0000  
Dilution: : 1.0000  
Sample Amount: : 1.00000 [ng/ul] (not used in calc.)  
Do not use Multiplier & Dilution Factor with ISTDs

Signal 1: VWD1 A, Wavelength=254 nm

| Peak # | RetTime [min] | Type | Width [min] | Area mAU   | Height *s | Area %  |
|--------|---------------|------|-------------|------------|-----------|---------|
| 1      | 7.497         | VV   | 0.2232      | 1660.31873 | 115.42051 | 49.9103 |
| 2      | 8.176         | VV   | 0.2459      | 1666.28894 | 105.20586 | 50.0897 |

Instrument 1 6/2/2020 5:21:18 PM QLL

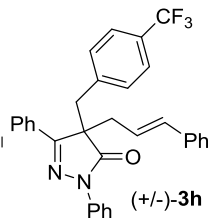

Page 1 of 2

Data File D:\CHEM32\1\DATA\2020\2019001473.D  
Sample Name: JDW-11-23A

=====

Acq. Operator : QLL  
Acq. Instrument : Instrument 1 Location : Vial 66  
Injection Date : 5/9/2020 3:51:29 PM Inj Volume : 5.0 µl

Acq. Method : D:\CHEM32\1\METHODS\ZCY-OD.M  
Last changed : 5/9/2020 3:47:36 PM by QLL  
(modified after loading)

Analysis Method : D:\CHEM32\1\METHODS\ZCY-OD.M  
Last changed : 6/2/2020 5:14:47 PM by QLL  
(modified after loading)

Method Info : AD-H, Hexane/iPrOH=90/10, 0.8mL/min, 254nm, 30 oC

Sample Info : OD-H, Hexane/iPrOH=85/15, 1.0 mL/min, 254nm, 30 oC

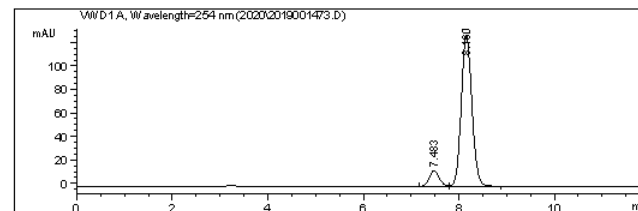

Area Percent Report

Sorted By : Signal  
Multiplier: : 1.0000  
Dilution: : 1.0000  
Sample Amount: : 1.00000 [ng/ul] (not used in calc.)  
Do not use Multiplier & Dilution Factor with ISTDs

Signal 1: VWD1 A, Wavelength=254 nm

| Peak # | RetTime [min] | Type | Width [min] | Area mAU   | Height *s | Area %  |
|--------|---------------|------|-------------|------------|-----------|---------|
| 1      | 7.483         | BV   | 0.2255      | 191.43976  | 13.35133  | 8.7295  |
| 2      | 8.160         | VB   | 0.2430      | 2001.58899 | 128.41409 | 91.2705 |

Instrument 1 6/2/2020 5:22:03 PM QLL

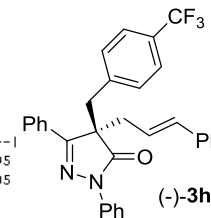

Page 1 of 2

Data File D:\CHEM32\1\DATA\2020\2019001431.D  
Sample Name: JDW-11-23B-rac

=====

Acq. Operator : QLL  
Acq. Instrument : Instrument 1 Location : Vial 66  
Injection Date : 4/24/2020 9:51:16 PM  
Inj Volume : 5.0 µl

Acq. Method : D:\CHEM32\1\METHODS\ZCY-0D.M  
Last changed : 4/24/2020 10:14:32 PM by QLL  
(modified after loading)

Analysis Method : D:\CHEM32\1\METHODS\ZCY-0D.M  
Last changed : 6/2/2020 4:55:50 PM by QLL  
(modified after loading)

Method Info : AD-H, Hexane/iPrOH=90/10, 0.8mL/min, 254nm, 30 oC

Sample Info : AD-H, Hexane/iPrOH=70/30, 1.0mL/min, 254nm, 30 oC

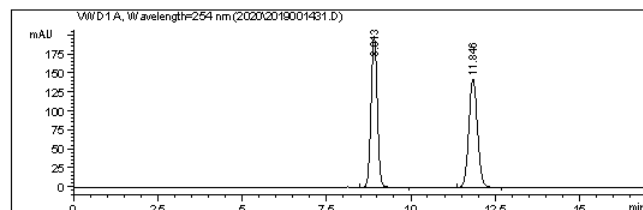

Area Percent Report

Sorted By : Signal  
Multiplier: : 1.0000  
Dilution: : 1.0000  
Sample Amount: : 1.00000 [ng/ul] (not used in calc.)  
Do not use Multiplier & Dilution Factor with ISTDs

Signal 1: VWD1 A, Wavelength=254 nm

| Peak # | RetTime [min] | Type | Width [min] | Area mAU   | Height [mAU] | Area %  |
|--------|---------------|------|-------------|------------|--------------|---------|
| 1      | 8.913         | VB   | 0.1983      | 2542.11646 | 199.29805    | 50.0975 |
| 2      | 11.846        | BB   | 0.2738      | 2532.21997 | 142.81018    | 49.9025 |

Instrument 1 6/2/2020 4:55:58 PM QLL

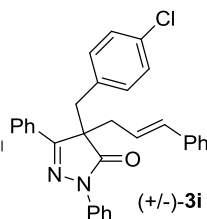

Page 1 of 2

Data File D:\CHEM32\1\DATA\2020\2019001432.D  
Sample Name: JDW-11-23B

=====

Acq. Operator : QLL  
Acq. Instrument : Instrument 1 Location : Vial 66  
Injection Date : 4/24/2020 10:15:47 PM  
Inj Volume : 5.0 µl

Acq. Method : D:\CHEM32\1\METHODS\ZCY-0D.M  
Last changed : 4/24/2020 10:14:48 PM by QLL  
(modified after loading)

Analysis Method : D:\CHEM32\1\METHODS\ZCY-0D.M  
Last changed : 6/2/2020 4:55:50 PM by QLL  
(modified after loading)

Method Info : AD-H, Hexane/iPrOH=90/10, 0.8mL/min, 254nm, 30 oC

Sample Info : AD-H, Hexane/iPrOH=70/30, 1.0mL/min, 254nm, 30 oC

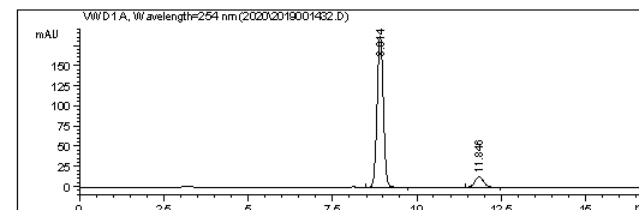

Area Percent Report

Sorted By : Signal  
Multiplier: : 1.0000  
Dilution: : 1.0000  
Sample Amount: : 1.00000 [ng/ul] (not used in calc.)  
Do not use Multiplier & Dilution Factor with ISTDs

Signal 1: VWD1 A, Wavelength=254 nm

| Peak # | RetTime [min] | Type | Width [min] | Area mAU   | Height [mAU] | Area %  |
|--------|---------------|------|-------------|------------|--------------|---------|
| 1      | 8.914         | VB   | 0.1980      | 2381.44482 | 187.04178    | 91.1274 |
| 2      | 11.846        | BB   | 0.2766      | 231.86928  | 13.08733     | 8.8726  |

Instrument 1 6/2/2020 4:57:11 PM QLL

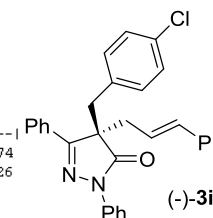

Page 1 of 2

Data File D:\CHEM32\1\DATA\2020\2019001460.D  
Sample Name: JDW-11-26B-rac

=====

Acq. Operator : QLL  
Acq. Instrument : Instrument 1 Location : Vial 66  
Injection Date : 5/7/2020 4:35:10 PM Inj Volume : 5.0 µl

Acq. Method : D:\CHEM32\1\METHODS\ZCY-0D.M  
Last changed : 5/7/2020 4:46:24 PM by QLL  
(modified after loading)

Analysis Method : D:\CHEM32\1\METHODS\ZCY-0D.M  
Last changed : 6/2/2020 5:13:12 PM by QLL  
(modified after loading)

Method Info : AD-H, Hexane/iPrOH=90/10, 0.8mL/min, 254nm, 30 oC

Sample Info : AD-H, Hexane/iPrOH=70/30, 1.0 mL/min, 254nm, 30 oC

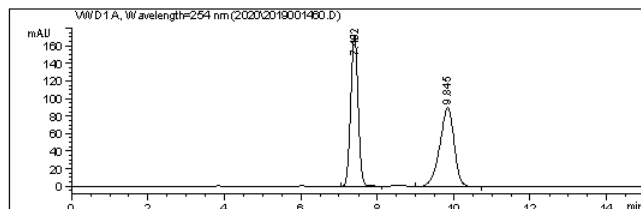

Area Percent Report

Sorted By : Signal  
Multiplier: : 1.0000  
Dilution: : 1.0000  
Sample Amount: : 1.00000 [ng/ul] (not used in calc.)  
Do not use Multiplier & Dilution Factor with ISTDs

Signal 1: VWD1 A, Wavelength=254 nm

| Peak # | RetTime [min] | Type | Width [min] | Area mAU   | Height [mAU] | Area %  |
|--------|---------------|------|-------------|------------|--------------|---------|
| 1      | 7.402         | VV   | 0.2133      | 2334.07910 | 172.39056    | 50.1113 |
| 2      | 9.845         | VB   | 0.3922      | 2323.71240 | 89.78840     | 49.8887 |

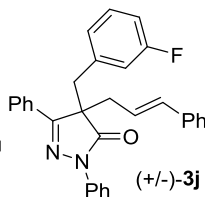

Data File D:\CHEM32\1\DATA\2020\2019001461.D  
Sample Name: JDW-11-26B

=====

Acq. Operator : QLL  
Acq. Instrument : Instrument 1 Location : Vial 66  
Injection Date : 5/7/2020 4:52:09 PM Inj Volume : 5.0 µl

Acq. Method : D:\CHEM32\1\METHODS\ZCY-0D.M  
Last changed : 5/7/2020 4:50:27 PM by QLL  
(modified after loading)

Analysis Method : D:\CHEM32\1\METHODS\ZCY-0D.M  
Last changed : 6/2/2020 5:13:12 PM by QLL  
(modified after loading)

Method Info : AD-H, Hexane/iPrOH=90/10, 0.8mL/min, 254nm, 30 oC

Sample Info : AD-H, Hexane/iPrOH=70/30, 1.0 mL/min, 254nm, 30 oC

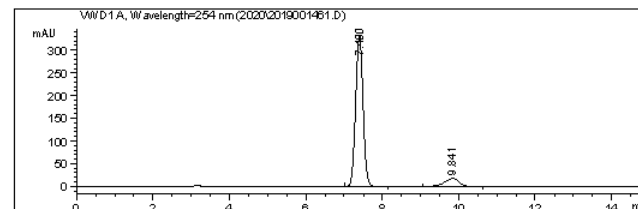

Area Percent Report

Sorted By : Signal  
Multiplier: : 1.0000  
Dilution: : 1.0000  
Sample Amount: : 1.00000 [ng/ul] (not used in calc.)  
Do not use Multiplier & Dilution Factor with ISTDs

Signal 1: VWD1 A, Wavelength=254 nm

| Peak # | RetTime [min] | Type | Width [min] | Area mAU   | Height [mAU] | Area %  |
|--------|---------------|------|-------------|------------|--------------|---------|
| 1      | 7.400         | VV   | 0.2095      | 4482.69434 | 333.01968    | 90.7632 |
| 2      | 9.841         | VB   | 0.3967      | 456.19427  | 17.53584     | 9.2368  |

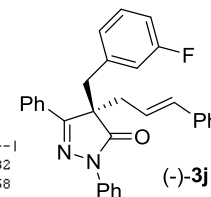



Data File D:\CHEM32\1\DATA\2020\2019001437.D  
Sample Name: JDW-11-24B-rac

```
=====
Acq. Operator   : QLL
Acq. Instrument : Instrument 1                      Location : Vial 66
Injection Date  : 4/25/2020 5:21:37 PM
                                           Inj Volume : 5.0 µl

Acq. Method     : D:\CHEM32\1\METHODS\ZCY-OD.M
Last changed    : 4/25/2020 5:20:28 PM by QLL
                  (modified after loading)

Analysis Method : D:\CHEM32\1\METHODS\ZCY-OD.M
Last changed    : 6/2/2020 5:00:06 PM by QLL
                  (modified after loading)

Method Info     : AD-H, Hexane/iPrOH=90/10, 0.8mL/min, 254nm, 30 oC
=====
```

Sample Info : AD-H, Hexane/iPrOH=70/30, 1.0mL/min, 254nm, 30 oC

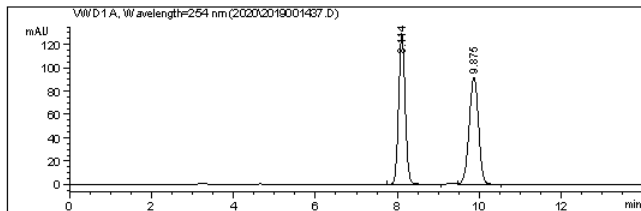

## Area Percent Report

```
Sorted By      :      Signal
Multiplier:    :      1.0000
Dilution:      :      1.0000
Sample Amount: :      1.00000 [ng/ul] (not used in calc.)
Do not use Multiplier & Dilution Factor with ISTDs
```

Signal 1: VWD1 A, Wavelength=254 nm

| Peak # | RetTime [min] | Type | Width [min] | Area mAU *s | Height [mAU] | Area %  |
|--------|---------------|------|-------------|-------------|--------------|---------|
| 1      | 8.114         | BB   | 0.1752      | 1455.30786  | 129.13887    | 50.0795 |
| 2      | 9.875         | VB   | 0.2462      | 1450.68701  | 91.48318     | 49.9205 |

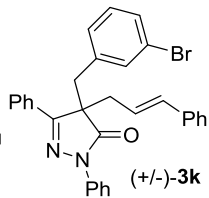

Instrument 1 6/2/2020 5:00:16 PM QLL

Page 1 of 2

Data File D:\CHEM32\1\DATA\2020\2019001438.D  
Sample Name: JDW-11-24B

```
=====
Acq. Operator   : QLL
Acq. Instrument : Instrument 1                      Location : Vial 66
Injection Date  : 4/25/2020 5:41:12 PM
                                           Inj Volume : 5.0 µl

Acq. Method     : D:\CHEM32\1\METHODS\ZCY-0D.M
Last changed    : 4/25/2020 5:40:21 PM by QLL
                  (modified after loading)

Analysis Method : D:\CHEM32\1\METHODS\ZCY-0D.M
Last changed    : 6/2/2020 5:00:06 PM by QLL
                  (modified after loading)

Method Info     : AD-H, Hexane/iPrOH=90/10, 0.8mL/min, 254nm, 30 oC
=====
```

Sample Info : AD-H, Hexane/iPrOH=70/30, 1.0mL/min, 254nm, 30 oC

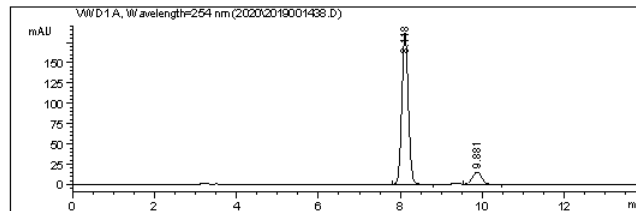

## Area Percent Report

```
Sorted By      :      Signal
Multiplier:    :      1.0000
Dilution:      :      1.0000
Sample Amount: :      1.00000 [ng/ul] (not used in calc.)
Do not use Multiplier & Dilution Factor with ISTDs
```

Signal 1: VWD1 A, Wavelength=254 nm

| Peak # | RetTime [min] | Type | Width [min] | Area mAU *s | Height [mAU] | Area %  |
|--------|---------------|------|-------------|-------------|--------------|---------|
| 1      | 8.118         | BB   | 0.1743      | 2082.42017  | 185.97321    | 89.7598 |
| 2      | 9.881         | VB   | 0.2489      | 237.57143   | 14.99347     | 10.2402 |

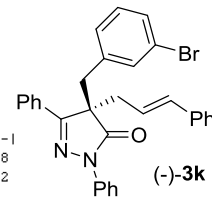

Instrument 1 6/2/2020 5:01:05 PM QLL

Page 1 of 2

Data File D:\CHEM32\1\DATA\2020\2019001435.D  
Sample Name: JDW-11-24A-rac

```

=====
Acq. Operator   : QLL
Acq. Instrument : Instrument 1          Location : Vial 66
Injection Date  : 4/25/2020 4:45:11 PM
                                           Inj Volume : 5.0 µl

Acq. Method     : D:\CHEM32\1\METHODS\ZCY-0D.M
Last changed    : 4/25/2020 4:56:28 PM by QLL
                  (modified after loading)
Analysis Method : D:\CHEM32\1\METHODS\ZCY-0D.M
Last changed    : 6/2/2020 4:58:06 PM by QLL
                  (modified after loading)
Method Info     : AD-H, Hexane/iPrOH=90/10, 0.8mL/min, 254nm, 30 oC
  
```

Sample Info : AD-H, Hexane/iPrOH=70/30, 1.0mL/min, 254nm, 30 oC

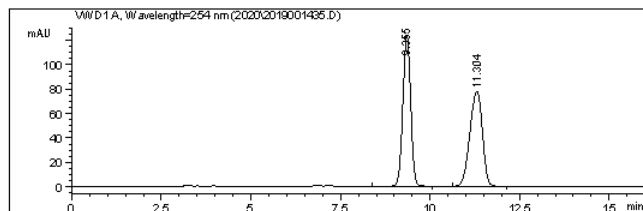

#### Area Percent Report

```

=====
Sorted By      :      Signal
Multiplier:    :      1.0000
Dilution:      :      1.0000
Sample Amount: :      1.00000 [ng/ul] (not used in calc.)
Do not use Multiplier & Dilution Factor with ISTDs
  
```

Signal 1: VWD1 A, Wavelength=254 nm

| Peak # | RetTime [min] | Type | Width [min] | Area mAU   | Area %  | Height [mAU] |
|--------|---------------|------|-------------|------------|---------|--------------|
| 1      | 9.355         | VB   | 0.2347      | 1870.32056 | 50.0370 | 123.62847    |
| 2      | 11.304        | BB   | 0.3858      | 1867.55505 | 49.9630 | 77.55623     |

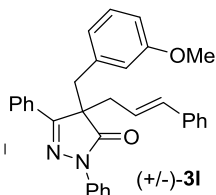

Instrument 1 6/2/2020 4:58:16 PM QLL

Page 1 of 2

Data File D:\CHEM32\1\DATA\2020\2019001436.D  
Sample Name: JDW-11-24A

```

=====
Acq. Operator   : QLL
Acq. Instrument : Instrument 1          Location : Vial 66
Injection Date  : 4/25/2020 5:03:13 PM
                                           Inj Volume : 5.0 µl

Acq. Method     : D:\CHEM32\1\METHODS\ZCY-0D.M
Last changed    : 4/25/2020 5:01:25 PM by QLL
                  (modified after loading)
Analysis Method : D:\CHEM32\1\METHODS\ZCY-0D.M
Last changed    : 6/2/2020 4:58:06 PM by QLL
                  (modified after loading)
Method Info     : AD-H, Hexane/iPrOH=90/10, 0.8mL/min, 254nm, 30 oC
  
```

Sample Info : AD-H, Hexane/iPrOH=70/30, 1.0mL/min, 254nm, 30 oC

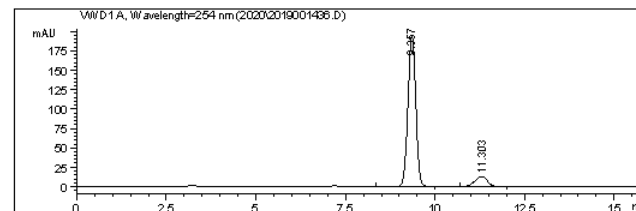

#### Area Percent Report

```

=====
Sorted By      :      Signal
Multiplier:    :      1.0000
Dilution:      :      1.0000
Sample Amount: :      1.00000 [ng/ul] (not used in calc.)
Do not use Multiplier & Dilution Factor with ISTDs
  
```

Signal 1: VWD1 A, Wavelength=254 nm

| Peak # | RetTime [min] | Type | Width [min] | Area mAU   | Area %  | Height [mAU] |
|--------|---------------|------|-------------|------------|---------|--------------|
| 1      | 9.357         | VB   | 0.2368      | 2929.89966 | 90.8308 | 194.64575    |
| 2      | 11.303        | BB   | 0.3850      | 295.76746  | 9.1692  | 12.31422     |

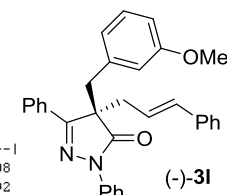

Instrument 1 6/2/2020 4:59:18 PM QLL

Page 1 of 2

Data File D:\CHEM32\1\DATA\2020\2019001439.D  
Sample Name: JDW-11-24C-rac

=====

Acq. Operator : QLL  
Acq. Instrument : Instrument 1 Location : Vial 66  
Injection Date : 4/25/2020 6:05:19 PM  
Inj Volume : 5.0 µl

Acq. Method : D:\CHEM32\1\METHODS\ZCY-0D.M  
Last changed : 4/25/2020 6:04:45 PM by QLL  
(modified after loading)

Analysis Method : D:\CHEM32\1\METHODS\ZCY-0D.M  
Last changed : 6/2/2020 5:03:40 PM by QLL  
(modified after loading)

Method Info : AD-H, Hexane/iPrOH=90/10, 0.8mL/min, 254nm, 30 oC

Sample Info : AD-H, Hexane/iPrOH=70/30, 1.0mL/min, 254nm, 30 oC

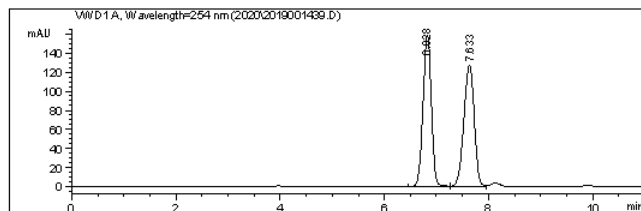

Area Percent Report

Sorted By : Signal  
Multiplier: : 1.0000  
Dilution: : 1.0000  
Sample Amount: : 1.00000 [ng/ul] (not used in calc.)  
Do not use Multiplier & Dilution Factor with ISTDs

Signal 1: VWD1 A, Wavelength=254 nm

| Peak # | RetTime [min] | Type | Width [min] | Area mAU   | Height [mAU] | Area %  |
|--------|---------------|------|-------------|------------|--------------|---------|
| 1      | 6.828         | VV   | 0.1734      | 1761.79199 | 158.40857    | 50.1071 |
| 2      | 7.633         | VV   | 0.2195      | 1754.26160 | 126.90518    | 49.8929 |

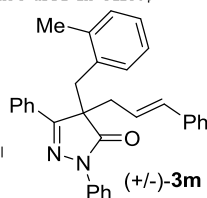

Instrument 1 6/2/2020 5:03:56 PM QLL

Page 1 of 2

Data File D:\CHEM32\1\DATA\2020\2019001440.D  
Sample Name: JDW-11-24C

=====

Acq. Operator : QLL  
Acq. Instrument : Instrument 1 Location : Vial 66  
Injection Date : 4/25/2020 6:22:14 PM  
Inj Volume : 5.0 µl

Acq. Method : D:\CHEM32\1\METHODS\ZCY-0D.M  
Last changed : 4/25/2020 6:21:03 PM by QLL  
(modified after loading)

Analysis Method : D:\CHEM32\1\METHODS\ZCY-0D.M  
Last changed : 6/2/2020 5:03:40 PM by QLL  
(modified after loading)

Method Info : AD-H, Hexane/iPrOH=90/10, 0.8mL/min, 254nm, 30 oC

Sample Info : AD-H, Hexane/iPrOH=70/30, 1.0mL/min, 254nm, 30 oC

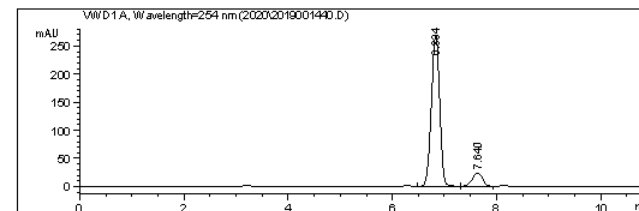

Area Percent Report

Sorted By : Signal  
Multiplier: : 1.0000  
Dilution: : 1.0000  
Sample Amount: : 1.00000 [ng/ul] (not used in calc.)  
Do not use Multiplier & Dilution Factor with ISTDs

Signal 1: VWD1 A, Wavelength=254 nm

| Peak # | RetTime [min] | Type | Width [min] | Area mAU   | Height [mAU] | Area %  |
|--------|---------------|------|-------------|------------|--------------|---------|
| 1      | 6.834         | VV   | 0.1763      | 2990.54663 | 268.88370    | 90.0001 |
| 2      | 7.640         | VV   | 0.2213      | 332.27780  | 23.76890     | 9.9999  |

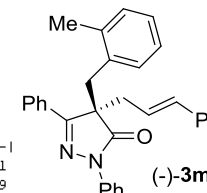

Instrument 1 6/2/2020 5:04:46 PM QLL

Page 1 of 2

Data File D:\CHEM32\1\DATA\2020\2019001458.D  
Sample Name: JDW-11-26A-rac

```

=====
Acq. Operator   : QLL
Acq. Instrument : Instrument 1          Location : Vial 66
Injection Date  : 5/7/2020 3:54:08 PM
                                           Inj Volume : 5.0 µl

Acq. Method     : D:\CHEM32\1\METHODS\ZCY-0D.M
Last changed    : 5/7/2020 4:10:28 PM by QLL
                  (modified after loading)
Analysis Method : D:\CHEM32\1\METHODS\ZCY-0D.M
Last changed    : 6/2/2020 5:11:40 PM by QLL
                  (modified after loading)
Method Info     : AD-H, Hexane/iPrOH=90/10, 0.8mL/min, 254nm, 30 oC
  
```

Sample Info : AD-H, Hexane/iPrOH=70/30, 1.0 mL/min, 254nm, 30 oC

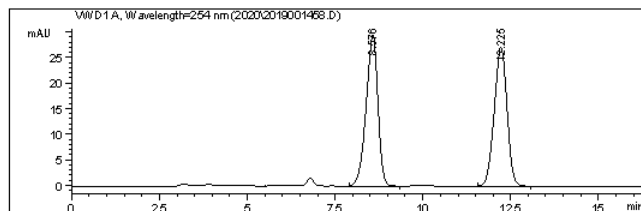

#### Area Percent Report

```

=====
Sorted By      :      Signal
Multiplier:    :      1.0000
Dilution:      :      1.0000
Sample Amount: :      1.00000 [ng/ul] (not used in calc.)
Do not use Multiplier & Dilution Factor with ISTDs
  
```

Signal 1: VWD1 A, Wavelength=254 nm

| Peak # | RetTime [min] | Type | Width [min] | Area mAU  | Height [mAU] | Area %  |
|--------|---------------|------|-------------|-----------|--------------|---------|
| 1      | 8.576         | BB   | 0.3546      | 690.20905 | 29.48875     | 50.0576 |
| 2      | 12.225        | BB   | 0.3952      | 688.62183 | 27.12108     | 49.9424 |

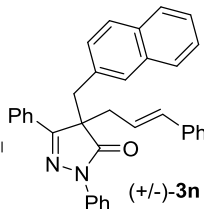

Instrument 1 6/2/2020 5:11:42 PM QLL

Page 1 of 2

Data File D:\CHEM32\1\DATA\2020\2019001459.D  
Sample Name: JDW-11-26A

```

=====
Acq. Operator   : QLL
Acq. Instrument : Instrument 1          Location : Vial 66
Injection Date  : 5/7/2020 4:11:43 PM
                                           Inj Volume : 5.0 µl

Acq. Method     : D:\CHEM32\1\METHODS\ZCY-0D.M
Last changed    : 5/7/2020 4:10:45 PM by QLL
                  (modified after loading)
Analysis Method : D:\CHEM32\1\METHODS\ZCY-0D.M
Last changed    : 6/2/2020 5:11:40 PM by QLL
                  (modified after loading)
Method Info     : AD-H, Hexane/iPrOH=90/10, 0.8mL/min, 254nm, 30 oC
  
```

Sample Info : AD-H, Hexane/iPrOH=70/30, 1.0 mL/min, 254nm, 30 oC

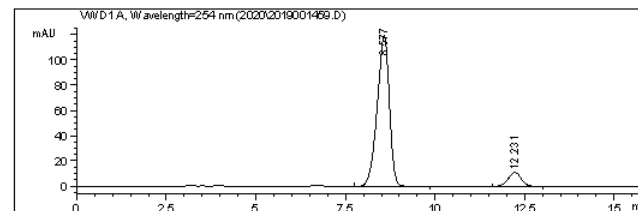

#### Area Percent Report

```

=====
Sorted By      :      Signal
Multiplier:    :      1.0000
Dilution:      :      1.0000
Sample Amount: :      1.00000 [ng/ul] (not used in calc.)
Do not use Multiplier & Dilution Factor with ISTDs
  
```

Signal 1: VWD1 A, Wavelength=254 nm

| Peak # | RetTime [min] | Type | Width [min] | Area mAU   | Height [mAU] | Area %  |
|--------|---------------|------|-------------|------------|--------------|---------|
| 1      | 8.577         | VB   | 0.3554      | 2808.71777 | 119.63621    | 91.0242 |
| 2      | 12.231        | BB   | 0.3945      | 276.96320  | 10.93645     | 8.9758  |

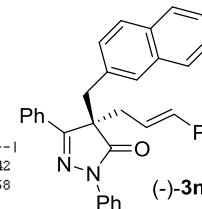

Instrument 1 6/2/2020 5:12:33 PM QLL

Page 1 of 2

Data File D:\CHEM32\1\DATA\2020\2019001464.D  
Sample Name: JDW-11-26C-rac

=====

|                 |                                                     |                     |
|-----------------|-----------------------------------------------------|---------------------|
| Acq. Operator   | : QLL                                               |                     |
| Acq. Instrument | : Instrument 1                                      | Location : Vial 66  |
| Injection Date  | : 5/7/2020 6:22:03 PM                               |                     |
|                 |                                                     | Inj Volume : 5.0 µl |
| Acq. Method     | : D:\CHEM32\1\METHODS\ZCY-0D.M                      |                     |
| Last changed    | : 5/7/2020 6:32:50 PM by QLL                        |                     |
|                 | (modified after loading)                            |                     |
| Analysis Method | : D:\CHEM32\1\METHODS\ZCY-0D.M                      |                     |
| Last changed    | : 6/2/2020 5:14:47 PM by QLL                        |                     |
|                 | (modified after loading)                            |                     |
| Method Info     | : AD-H, Hexane/iPrOH=90/10, 0.8mL/min, 254nm, 30 oC |                     |

Sample Info : AD-H, Hexane/iPrOH=85/15, 1.0 mL/min, 254nm, 30 oC

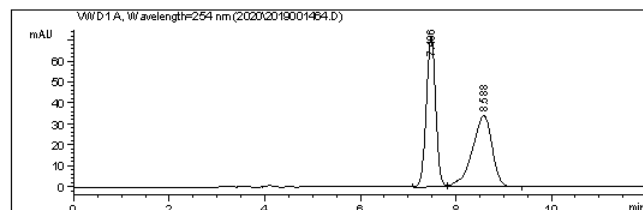

Area Percent Report

Sorted By : Signal

|                |   |                                     |
|----------------|---|-------------------------------------|
| Multiplier:    | : | 1.0000                              |
| Dilution:      | : | 1.0000                              |
| Sample Amount: | : | 1.00000 [ng/ul] (not used in calc.) |

Do not use Multiplier & Dilution Factor with ISTDs

Signal 1: VWD1 A, Wavelength=254 nm

| Peak # | RetTime [min] | Type | Width [min] | Area mAU  | Height [mAU] | Area %  |
|--------|---------------|------|-------------|-----------|--------------|---------|
| 1      | 7.486         | BV   | 0.2115      | 982.67633 | 72.06633     | 49.8378 |
| 2      | 8.588         | VB   | 0.4441      | 989.07385 | 34.01458     | 50.1622 |

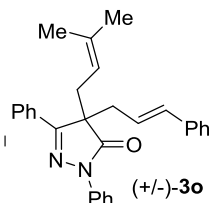

Instrument 1 6/2/2020 5:14:58 PM QLL

Page 1 of 2

Data File D:\CHEM32\1\DATA\2020\2019001465.D  
Sample Name: JDW-11-26C

=====

|                 |                                                     |                     |
|-----------------|-----------------------------------------------------|---------------------|
| Acq. Operator   | : QLL                                               |                     |
| Acq. Instrument | : Instrument 1                                      | Location : Vial 66  |
| Injection Date  | : 5/7/2020 7:13:54 PM                               |                     |
|                 |                                                     | Inj Volume : 5.0 µl |
| Acq. Method     | : D:\CHEM32\1\METHODS\ZCY-0D.M                      |                     |
| Last changed    | : 5/7/2020 6:34:21 PM by QLL                        |                     |
|                 | (modified after loading)                            |                     |
| Analysis Method | : D:\CHEM32\1\METHODS\ZCY-0D.M                      |                     |
| Last changed    | : 6/2/2020 5:14:47 PM by QLL                        |                     |
|                 | (modified after loading)                            |                     |
| Method Info     | : AD-H, Hexane/iPrOH=90/10, 0.8mL/min, 254nm, 30 oC |                     |

Sample Info : AD-H, Hexane/iPrOH=85/15, 1.0 mL/min, 254nm, 30 oC

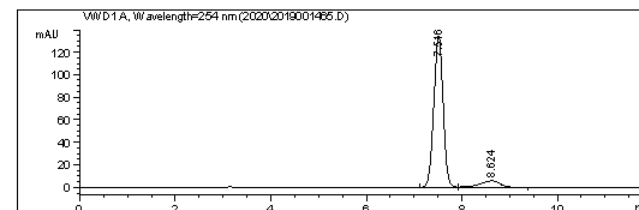

Area Percent Report

Sorted By : Signal

|                |   |                                     |
|----------------|---|-------------------------------------|
| Multiplier:    | : | 1.0000                              |
| Dilution:      | : | 1.0000                              |
| Sample Amount: | : | 1.00000 [ng/ul] (not used in calc.) |

Do not use Multiplier & Dilution Factor with ISTDs

Signal 1: VWD1 A, Wavelength=254 nm

| Peak # | RetTime [min] | Type | Width [min] | Area mAU   | Height [mAU] | Area %  |
|--------|---------------|------|-------------|------------|--------------|---------|
| 1      | 7.516         | BV   | 0.2114      | 1829.46240 | 134.29042    | 91.5815 |
| 2      | 8.624         | VB   | 0.4422      | 168.17064  | 5.71650      | 8.4185  |

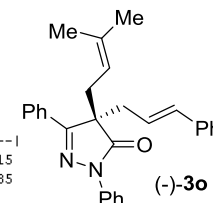

Instrument 1 6/2/2020 5:15:42 PM QLL

Page 1 of 2

Data File D:\CHEM32\1\DATA\2020\2019001403.D  
 Sample Name: JDW-11-14C-rac

```

=====
Acq. Operator   : QLL
Acq. Instrument : Instrument 1          Location : Vial 66
Injection Date  : 4/17/2020 4:01:11 PM
                                           Inj Volume : 5.0 µl

Acq. Method     : D:\CHEM32\1\METHODS\ZCY-0D.M
Last changed    : 4/17/2020 3:59:52 PM by QLL
                  (modified after loading)
Analysis Method : D:\CHEM32\1\METHODS\ZCY-0D.M
Last changed    : 6/2/2020 4:00:36 PM by QLL
                  (modified after loading)
Method Info     : AD-H, Hexane/iPrOH=90/10, 0.8mL/min, 254nm, 30 oC
  
```

Sample Info : AD-H, Hexane/iPrOH=70/30, 1.0mL/min, 254nm, 30 oC

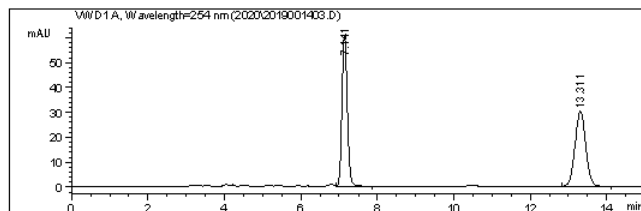

#### Area Percent Report

```

=====
Sorted By      :      Signal
Multiplier:    :      1.0000
Dilution:      :      1.0000
Sample Amount: :      1.00000 [ng/ul] (not used in calc.)
Do not use Multiplier & Dilution Factor with ISTDs
  
```

Signal 1: VWD1 A, Wavelength=254 nm

| Peak # | RetTime [min] | Type | Width [min] | Area mAU  | *s | Height [mAU] | Area %  |
|--------|---------------|------|-------------|-----------|----|--------------|---------|
| 1      | 7.141         | VB   | 0.1517      | 592.48999 |    | 60.71050     | 50.3027 |
| 2      | 13.311        | BB   | 0.3055      | 585.35980 |    | 30.09686     | 49.6973 |

Instrument 1 6/2/2020 4:12:19 PM QLL

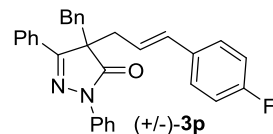

Page 1 of 2

Data File D:\CHEM32\1\DATA\2020\2019001404.D  
 Sample Name: JDW-11-14C

```

=====
Acq. Operator   : QLL
Acq. Instrument : Instrument 1          Location : Vial 66
Injection Date   : 4/17/2020 6:16:25 PM
                                           Inj Volume : 5.0 µl

Acq. Method     : D:\CHEM32\1\METHODS\ZCY-0D.M
Last changed    : 4/17/2020 6:15:44 PM by QLL
                  (modified after loading)
Analysis Method : D:\CHEM32\1\METHODS\ZCY-0D.M
Last changed    : 6/2/2020 4:00:36 PM by QLL
                  (modified after loading)
Method Info     : AD-H, Hexane/iPrOH=90/10, 0.8mL/min, 254nm, 30 oC
  
```

Sample Info : AD-H, Hexane/iPrOH=70/30, 1.0mL/min, 254nm, 30 oC

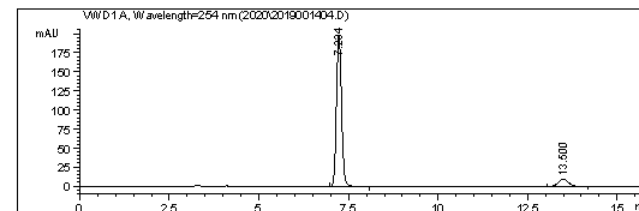

#### Area Percent Report

```

=====
Sorted By      :      Signal
Multiplier:    :      1.0000
Dilution:      :      1.0000
Sample Amount: :      1.00000 [ng/ul] (not used in calc.)
Do not use Multiplier & Dilution Factor with ISTDs
  
```

Signal 1: VWD1 A, Wavelength=254 nm

| Peak # | RetTime [min] | Type | Width [min] | Area mAU   | *s | Height [mAU] | Area %  |
|--------|---------------|------|-------------|------------|----|--------------|---------|
| 1      | 7.234         | VB   | 0.1527      | 1952.59485 |    | 198.28496    | 91.3421 |
| 2      | 13.500        | BB   | 0.3066      | 185.07805  |    | 9.35041      | 8.6579  |

Instrument 1 6/2/2020 4:13:48 PM QLL

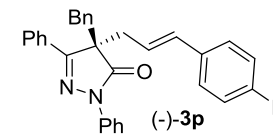

Page 1 of 2

Data File D:\CHEM32\1\DATA\2020\2019001406.D  
Sample Name: JDW-11-15-rac

```
=====
Acq. Operator   : QLL
Acq. Instrument : Instrument 1          Location : Vial 66
Injection Date  : 4/18/2020 3:04:36 PM
                                           Inj Volume : 5.0 µl

Acq. Method     : D:\CHEM32\1\METHODS\ZCY-0D.M
Last changed    : 4/18/2020 2:40:36 PM by QLL
                  (modified after loading)
Analysis Method : D:\CHEM32\1\METHODS\ZCY-0D.M
Last changed    : 6/2/2020 4:00:36 PM by QLL
                  (modified after loading)
Method Info     : AD-H, Hexane/iPrOH=90/10, 0.8mL/min, 254nm, 30 oC
```

Sample Info : AD-H, Hexane/iPrOH=70/30, 1.0mL/min, 254nm, 30 oC

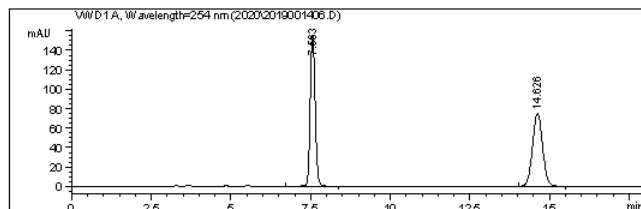

#### Area Percent Report

```
=====
Sorted By      : Signal
Multiplier:    : 1.0000
Dilution:      : 1.0000
Sample Amount: : 1.00000 [ng/ul] (not used in calc.)
Do not use Multiplier & Dilution Factor with ISTDs
```

Signal 1: VWD1 A, Wavelength=254 nm

| Peak # | RetTime [min] | Type | Width [min] | Area mAU *s | Height [mAU] | Area %  |
|--------|---------------|------|-------------|-------------|--------------|---------|
| 1      | 7.563         | VB   | 0.1646      | 1651.27161  | 155.53435    | 50.2073 |
| 2      | 14.626        | BB   | 0.3422      | 1637.63342  | 74.96562     | 49.7927 |

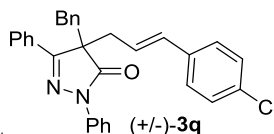

Instrument 1 6/2/2020 4:15:51 PM QLL

Page 1 of 2

Data File D:\CHEM32\1\DATA\2020\2019001407.D  
Sample Name: JDW-11-15A

```
=====
Acq. Operator   : QLL
Acq. Instrument : Instrument 1          Location : Vial 66
Injection Date   : 4/18/2020 3:28:16 PM
                                           Inj Volume : 5.0 µl

Acq. Method     : D:\CHEM32\1\METHODS\ZCY-0D.M
Last changed    : 4/18/2020 3:22:51 PM by QLL
                  (modified after loading)
Analysis Method : D:\CHEM32\1\METHODS\ZCY-0D.M
Last changed    : 6/2/2020 4:24:50 PM by QLL
                  (modified after loading)
Method Info     : AD-H, Hexane/iPrOH=90/10, 0.8mL/min, 254nm, 30 oC
```

Sample Info : AD-H, Hexane/iPrOH=70/30, 1.0mL/min, 254nm, 30 oC

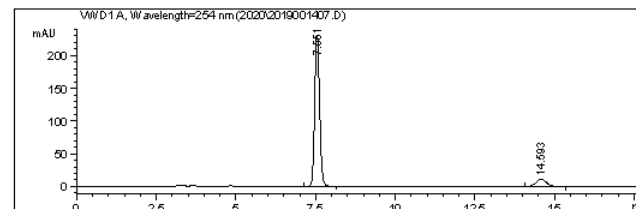

#### Area Percent Report

```
=====
Sorted By      : Signal
Multiplier:    : 1.0000
Dilution:      : 1.0000
Sample Amount: : 1.00000 [ng/ul] (not used in calc.)
Do not use Multiplier & Dilution Factor with ISTDs
```

Signal 1: VWD1 A, Wavelength=254 nm

| Peak # | RetTime [min] | Type | Width [min] | Area mAU *s | Height [mAU] | Area %  |
|--------|---------------|------|-------------|-------------|--------------|---------|
| 1      | 7.551         | VB   | 0.1641      | 2436.01196  | 230.36661    | 91.2665 |
| 2      | 14.593        | BB   | 0.3389      | 233.10641   | 10.68843     | 8.7335  |

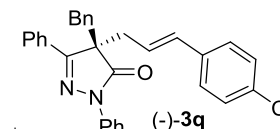

Instrument 1 6/2/2020 4:25:03 PM QLL

Page 1 of 2

Data File D:\CHEM32\1\DATA\2020\2019001410.D  
Sample Name: JDW-11-15C-rac

```
=====
Acq. Operator   : QLL
Acq. Instrument : Instrument 1          Location : Vial 66
Injection Date  : 4/18/2020 4:26:34 PM
                                           Inj Volume : 5.0 µl

Acq. Method     : D:\CHEM32\1\METHODS\ZCY-0D.M
Last changed    : 4/18/2020 4:27:04 PM by QLL
                  (modified after loading)
Analysis Method : D:\CHEM32\1\METHODS\ZCY-0D.M
Last changed    : 6/2/2020 4:30:29 PM by QLL
                  (modified after loading)
Method Info     : AD-H, Hexane/iPrOH=90/10, 0.8mL/min, 254nm, 30 oC
```

Sample Info : AD-H, Hexane/iPrOH=70/30, 1.0mL/min, 254nm, 30 oC

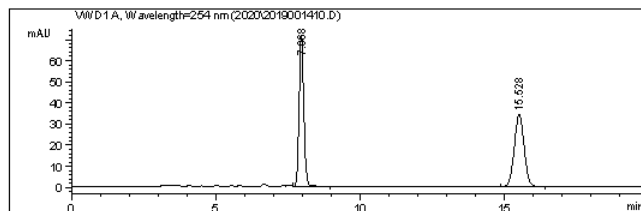

#### Area Percent Report

```
=====
Sorted By      :      Signal
Multiplier:    :      1.0000
Dilution:      :      1.0000
Sample Amount: :      1.00000 [ng/ul] (not used in calc.)
Do not use Multiplier & Dilution Factor with ISTDs
```

Signal 1: VWD1 A, Wavelength=254 nm

| Peak # | RetTime [min] | Type | Width [min] | Area mAU  | *s | Height [mAU] | Area %  |
|--------|---------------|------|-------------|-----------|----|--------------|---------|
| 1      | 7.968         | VB   | 0.1753      | 806.06500 |    | 71.44373     | 50.1973 |
| 2      | 15.528        | VB   | 0.3677      | 799.72906 |    | 33.98632     | 49.8027 |

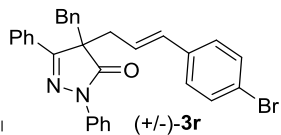

Instrument 1 6/2/2020 4:30:44 PM QLL

Page 1 of 2

Data File D:\CHEM32\1\DATA\2020\2019001411.D  
Sample Name: JDW-11-15C

```
=====
Acq. Operator   : QLL
Acq. Instrument : Instrument 1          Location : Vial 66
Injection Date  : 4/18/2020 4:47:36 PM
                                           Inj Volume : 5.0 µl

Acq. Method     : D:\CHEM32\1\METHODS\ZCY-0D.M
Last changed    : 4/18/2020 4:46:51 PM by QLL
                  (modified after loading)
Analysis Method : D:\CHEM32\1\METHODS\ZCY-0D.M
Last changed    : 6/2/2020 4:30:29 PM by QLL
                  (modified after loading)
Method Info     : AD-H, Hexane/iPrOH=90/10, 0.8mL/min, 254nm, 30 oC
```

Sample Info : AD-H, Hexane/iPrOH=70/30, 1.0mL/min, 254nm, 30 oC

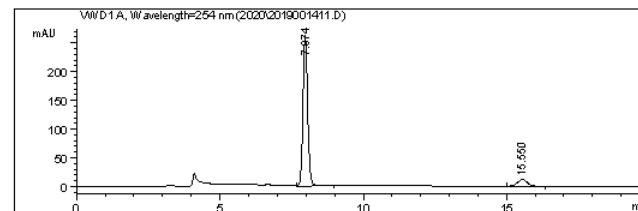

#### Area Percent Report

```
=====
Sorted By      :      Signal
Multiplier:    :      1.0000
Dilution:      :      1.0000
Sample Amount: :      1.00000 [ng/ul] (not used in calc.)
Do not use Multiplier & Dilution Factor with ISTDs
```

Signal 1: VWD1 A, Wavelength=254 nm

| Peak # | RetTime [min] | Type | Width [min] | Area mAU   | *s | Height [mAU] | Area %  |
|--------|---------------|------|-------------|------------|----|--------------|---------|
| 1      | 7.974         | VV   | 0.1774      | 2998.23755 |    | 261.60059    | 91.5637 |
| 2      | 15.550        | BB   | 0.3673      | 276.24475  |    | 11.75653     | 8.4363  |

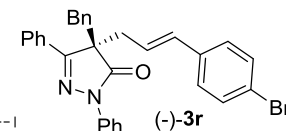

Instrument 1 6/2/2020 4:33:02 PM QLL

Page 1 of 2



Data File D:\CHEM32\1\DATA\2020\2019001408.D  
Sample Name: JDW-11-15B-rac

```
=====
Acq. Operator   : QLL
Acq. Instrument : Instrument 1          Location : Vial 66
Injection Date  : 4/18/2020 3:48:56 PM
                                           Inj Volume : 5.0 µl

Acq. Method     : D:\CHEM32\1\METHODS\ZCY-0D.M
Last changed    : 4/18/2020 4:02:51 PM by QLL
                  (modified after loading)
Analysis Method : D:\CHEM32\1\METHODS\ZCY-0D.M
Last changed    : 6/2/2020 4:27:39 PM by QLL
                  (modified after loading)
Method Info     : AD-H, Hexane/iPrOH=90/10, 0.8mL/min, 254nm, 30 oC
```

Sample Info : AD-H, Hexane/iPrOH=70/30, 1.0mL/min, 254nm, 30 oC

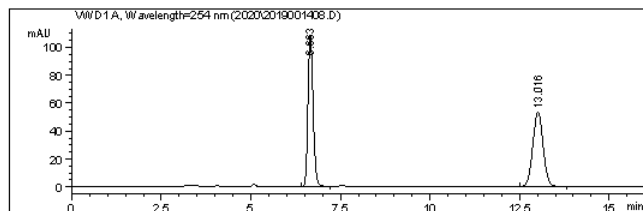

#### Area Percent Report

```
=====
Sorted By      :      Signal
Multiplier:    :      1.0000
Dilution:      :      1.0000
Sample Amount: :      1.00000 [ng/ul] (not used in calc.)
Do not use Multiplier & Dilution Factor with ISTDs
```

Signal 1: VWD1 A, Wavelength=254 nm

| Peak # | RetTime [min] | Type | Width [min] | Area mAU *s | Height [mAU] | Area %  |
|--------|---------------|------|-------------|-------------|--------------|---------|
| 1      | 6.663         | VB   | 0.1535      | 1072.36145  | 108.19653    | 50.0769 |
| 2      | 13.016        | BB   | 0.3128      | 1069.06848  | 53.26414     | 49.9231 |

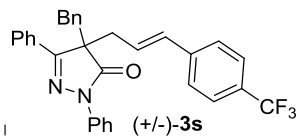

Instrument 1 6/2/2020 4:27:53 PM QLL

Page 1 of 2

Data File D:\CHEM32\1\DATA\2020\2019001409.D  
Sample Name: JDW-11-15B

```
=====
Acq. Operator   : QLL
Acq. Instrument : Instrument 1          Location : Vial 66
Injection Date  : 4/18/2020 4:07:47 PM
                                           Inj Volume : 5.0 µl

Acq. Method     : D:\CHEM32\1\METHODS\ZCY-0D.M
Last changed    : 4/18/2020 4:05:10 PM by QLL
                  (modified after loading)
Analysis Method : D:\CHEM32\1\METHODS\ZCY-0D.M
Last changed    : 6/2/2020 4:27:39 PM by QLL
                  (modified after loading)
Method Info     : AD-H, Hexane/iPrOH=90/10, 0.8mL/min, 254nm, 30 oC
```

Sample Info : AD-H, Hexane/iPrOH=70/30, 1.0mL/min, 254nm, 30 oC

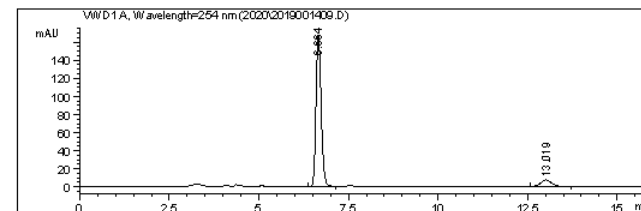

#### Area Percent Report

```
=====
Sorted By      :      Signal
Multiplier:    :      1.0000
Dilution:      :      1.0000
Sample Amount: :      1.00000 [ng/ul] (not used in calc.)
Do not use Multiplier & Dilution Factor with ISTDs
```

Signal 1: VWD1 A, Wavelength=254 nm

| Peak # | RetTime [min] | Type | Width [min] | Area mAU *s | Height [mAU] | Area %  |
|--------|---------------|------|-------------|-------------|--------------|---------|
| 1      | 6.664         | VV   | 0.1540      | 1663.79041  | 167.10034    | 92.1389 |
| 2      | 13.019        | BB   | 0.3134      | 141.95082   | 7.05311      | 7.8611  |

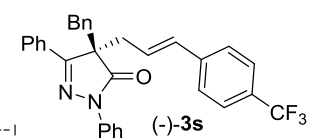

Instrument 1 6/2/2020 4:29:07 PM QLL

Page 1 of 2

Data File D:\CHEM32\1\DATA\2020\2019001401.D  
Sample Name: JDW-11-14B-rac

=====

Acq. Operator : QLL  
Acq. Instrument : Instrument 1 Location : Vial 66  
Injection Date : 4/17/2020 3:29:11 PM  
Inj Volume : 5.0 µl

Acq. Method : D:\CHEM32\1\METHODS\ZCY-0D.M  
Last changed : 4/17/2020 11:34:48 AM by QLL  
Analysis Method : D:\CHEM32\1\METHODS\ZCY-0D.M  
Last changed : 6/2/2020 4:00:36 PM by QLL  
(modified after loading)

Method Info : AD-H, Hexane/iPrOH=90/10, 0.8mL/min, 254nm, 30 oC

Sample Info : AD-H, Hexane/iPrOH=70/30, 1.0mL/min, 254nm, 30 oC

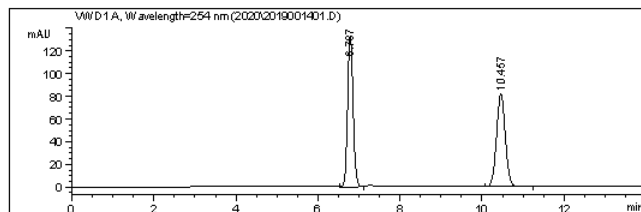

=====  
Area Percent Report  
=====

Sorted By : Signal  
Multiplier: : 1.0000  
Dilution: : 1.0000  
Sample Amount: : 1.00000 [ng/ul] (not used in calc.)  
Do not use Multiplier & Dilution Factor with ISTDs

Signal 1: VWD1 A, Wavelength=254 nm

| Peak # | RetTime [min] | Type | Width [min] | Area mAU *s | Height [mAU] | Area %  |
|--------|---------------|------|-------------|-------------|--------------|---------|
| 1      | 6.787         | VV   | 0.1459      | 1234.00903  | 133.20863    | 49.9910 |
| 2      | 10.457        | BV   | 0.2371      | 1234.45264  | 81.84406     | 50.0090 |

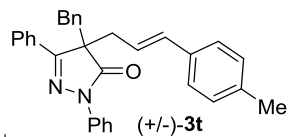

Instrument 1 6/2/2020 4:08:19 PM QLL

Page 1 of 2

Data File D:\CHEM32\1\DATA\2020\2019001402.D  
Sample Name: JDW-11-14B

=====

Acq. Operator : QLL  
Acq. Instrument : Instrument 1 Location : Vial 66  
Injection Date : 4/17/2020 3:44:35 PM  
Inj Volume : 5.0 µl

Acq. Method : D:\CHEM32\1\METHODS\ZCY-0D.M  
Last changed : 4/17/2020 3:45:12 PM by QLL  
(modified after loading)

Analysis Method : D:\CHEM32\1\METHODS\ZCY-0D.M  
Last changed : 6/2/2020 4:00:36 PM by QLL  
(modified after loading)

Method Info : AD-H, Hexane/iPrOH=90/10, 0.8mL/min, 254nm, 30 oC

Sample Info : AD-H, Hexane/iPrOH=70/30, 1.0mL/min, 254nm, 30 oC

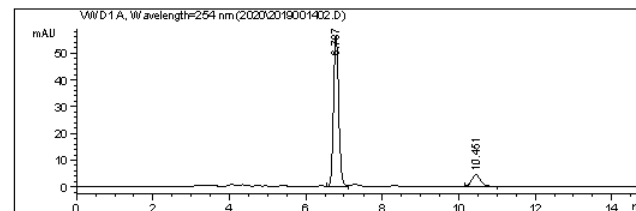

=====  
Area Percent Report  
=====

Sorted By : Signal  
Multiplier: : 1.0000  
Dilution: : 1.0000  
Sample Amount: : 1.00000 [ng/ul] (not used in calc.)  
Do not use Multiplier & Dilution Factor with ISTDs

Signal 1: VWD1 A, Wavelength=254 nm

| Peak # | RetTime [min] | Type | Width [min] | Area mAU *s | Height [mAU] | Area %  |
|--------|---------------|------|-------------|-------------|--------------|---------|
| 1      | 6.787         | VV   | 0.1460      | 523.84113   | 56.53329     | 89.0262 |
| 2      | 10.451        | BB   | 0.2354      | 64.57127    | 4.25287      | 10.9738 |

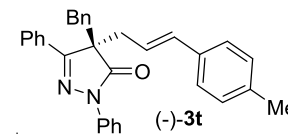

Instrument 1 6/2/2020 4:01:40 PM QLL

Page 1 of 2

Data File D:\CHEM32\1\DATA\2020\2019001413.D  
 Sample Name: JDW-11-17A-rac

=====

Acq. Operator : QLL  
 Acq. Instrument : Instrument 1 Location : Vial 66  
 Injection Date : 4/21/2020 10:04:30 PM Inj Volume : 5.0 µl

Acq. Method : D:\CHEM32\1\METHODS\ZCY-0D.M  
 Last changed : 4/21/2020 10:03:48 PM by QLL  
 (modified after loading)

Analysis Method : D:\CHEM32\1\METHODS\ZCY-0D.M  
 Last changed : 6/2/2020 4:34:08 PM by QLL  
 (modified after loading)

Method Info : AD-H, Hexane/iPrOH=90/10, 0.8mL/min, 254nm, 30 oC

Sample Info : AD-H, Hexane/iPrOH=70/30, 1.0mL/min, 254nm, 30 oC

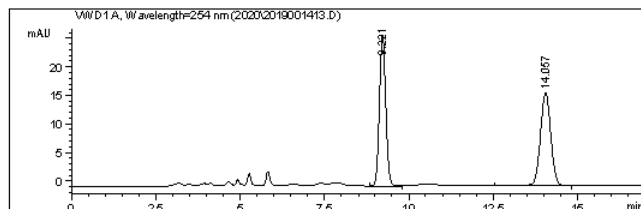

Area Percent Report

Sorted By : Signal  
 Multiplier: : 1.0000  
 Dilution: : 1.0000  
 Sample Amount: : 1.00000 [ng/ul] (not used in calc.)  
 Do not use Multiplier & Dilution Factor with ISTDs

Signal 1: VWD1 A, Wavelength=254 nm

| Peak # | RetTime [min] | Type | Width [min] | Area mAU  | *s | Height [mAU] | Area %  |
|--------|---------------|------|-------------|-----------|----|--------------|---------|
| 1      | 9.221         | BB   | 0.2061      | 347.93375 |    | 26.41357     | 49.6460 |
| 2      | 14.057        | BB   | 0.3372      | 352.89612 |    | 16.28989     | 50.3540 |

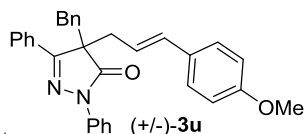

Instrument 1 6/2/2020 4:34:22 PM QLL

Page 1 of 2

Data File D:\CHEM32\1\DATA\2020\2019001414.D  
 Sample Name: JDW-11-17A

=====

Acq. Operator : QLL  
 Acq. Instrument : Instrument 1 Location : Vial 66  
 Injection Date : 4/21/2020 10:23:38 PM Inj Volume : 5.0 µl

Acq. Method : D:\CHEM32\1\METHODS\ZCY-0D.M  
 Last changed : 4/21/2020 10:21:33 PM by QLL  
 (modified after loading)

Analysis Method : D:\CHEM32\1\METHODS\ZCY-0D.M  
 Last changed : 6/2/2020 4:34:08 PM by QLL  
 (modified after loading)

Method Info : AD-H, Hexane/iPrOH=90/10, 0.8mL/min, 254nm, 30 oC

Sample Info : AD-H, Hexane/iPrOH=70/30, 1.0mL/min, 254nm, 30 oC

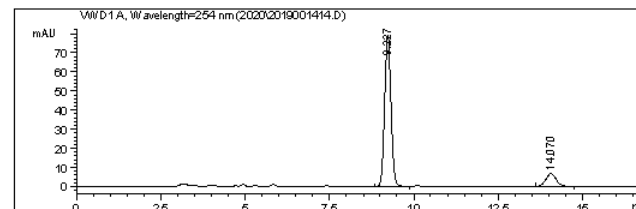

Area Percent Report

Sorted By : Signal  
 Multiplier: : 1.0000  
 Dilution: : 1.0000  
 Sample Amount: : 1.00000 [ng/ul] (not used in calc.)  
 Do not use Multiplier & Dilution Factor with ISTDs

Signal 1: VWD1 A, Wavelength=254 nm

| Peak # | RetTime [min] | Type | Width [min] | Area mAU   | *s | Height [mAU] | Area %  |
|--------|---------------|------|-------------|------------|----|--------------|---------|
| 1      | 9.227         | BV   | 0.2056      | 1038.68176 |    | 79.10696     | 88.1729 |
| 2      | 14.070        | BB   | 0.3318      | 139.32346  |    | 6.57264      | 11.8271 |

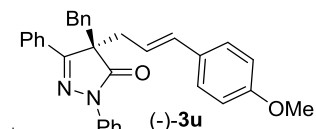

Instrument 1 6/2/2020 4:35:09 PM QLL

Page 1 of 2

Data File D:\CHEM32\1\DATA\2020\2019001485.D  
Sample Name: JDW-10-27A-rac

=====

|                 |                                                     |                    |
|-----------------|-----------------------------------------------------|--------------------|
| Acq. Operator   | : QLL                                               |                    |
| Acq. Instrument | : Instrument 1                                      | Location : Vial 66 |
| Injection Date  | : 5/11/2020 10:42:14 AM                             |                    |
|                 | Inj Volume : 5.0 µl                                 |                    |
| Acq. Method     | : D:\CHEM32\1\METHODS\ZCY-0D.M                      |                    |
| Last changed    | : 4/2/2020 9:16:53 AM by QLL                        |                    |
| Analysis Method | : D:\CHEM32\1\METHODS\ZCY-0D.M                      |                    |
| Last changed    | : 6/2/2020 5:30:50 PM by QLL                        |                    |
|                 | (modified after loading)                            |                    |
| Method Info     | : AD-H, Hexane/iPrOH=90/10, 0.8mL/min, 254nm, 30 oC |                    |

Sample Info : AD-H, Hexane/iPrOH=70/30, 1.0 mL/min, 254nm, 30 oC

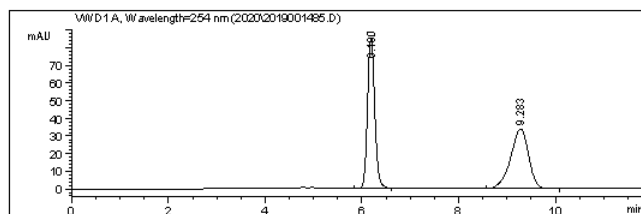

Area Percent Report

Sorted By : Signal

|                |   |                                     |
|----------------|---|-------------------------------------|
| Multiplier:    | : | 1.0000                              |
| Dilution:      | : | 1.0000                              |
| Sample Amount: | : | 1.00000 [ng/ul] (not used in calc.) |

Do not use Multiplier & Dilution Factor with ISTDs

Signal 1: VWD1 A, Wavelength=254 nm

| Peak # | RetTime [min] | Type | Width [min] | Area mAU *s | Height [mAU] | Area %  |
|--------|---------------|------|-------------|-------------|--------------|---------|
| 1      | 6.190         | VV   | 0.1628      | 895.35950   | 85.60767     | 50.5598 |
| 2      | 9.283         | BB   | 0.3966      | 875.53125   | 33.98829     | 49.4402 |

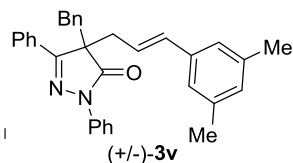

Data File D:\CHEM32\1\DATA\2020\2019001486.D  
Sample Name: JDW-10-27A

=====

|                 |                                                     |                    |
|-----------------|-----------------------------------------------------|--------------------|
| Acq. Operator   | : QLL                                               |                    |
| Acq. Instrument | : Instrument 1                                      | Location : Vial 66 |
| Injection Date  | : 5/11/2020 10:55:38 AM                             |                    |
|                 | Inj Volume : 5.0 µl                                 |                    |
| Acq. Method     | : D:\CHEM32\1\METHODS\ZCY-0D.M                      |                    |
| Last changed    | : 5/11/2020 10:54:22 AM by QLL                      |                    |
|                 | (modified after loading)                            |                    |
| Analysis Method | : D:\CHEM32\1\METHODS\ZCY-0D.M                      |                    |
| Last changed    | : 6/2/2020 5:30:50 PM by QLL                        |                    |
|                 | (modified after loading)                            |                    |
| Method Info     | : AD-H, Hexane/iPrOH=90/10, 0.8mL/min, 254nm, 30 oC |                    |

Sample Info : AD-H, Hexane/iPrOH=70/30, 1.0 mL/min, 254nm, 30 oC

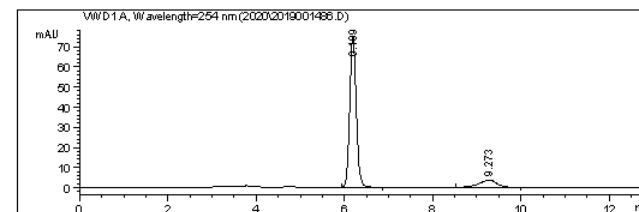

Area Percent Report

Sorted By : Signal

|                |   |                                     |
|----------------|---|-------------------------------------|
| Multiplier:    | : | 1.0000                              |
| Dilution:      | : | 1.0000                              |
| Sample Amount: | : | 1.00000 [ng/ul] (not used in calc.) |

Do not use Multiplier & Dilution Factor with ISTDs

Signal 1: VWD1 A, Wavelength=254 nm

| Peak # | RetTime [min] | Type | Width [min] | Area mAU *s | Height [mAU] | Area %  |
|--------|---------------|------|-------------|-------------|--------------|---------|
| 1      | 6.189         | BB   | 0.1611      | 773.67755   | 74.98215     | 88.8045 |
| 2      | 9.273         | VB   | 0.4102      | 97.53674    | 3.62274      | 11.1955 |

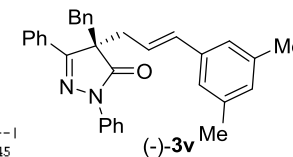

Data File D:\CHEM32\1\DATA\2020\2019001487.D  
Sample Name: JDW-10-27B-rac

=====

Acq. Operator : QLL  
Acq. Instrument : Instrument 1 Location : Vial 66  
Injection Date : 5/11/2020 3:23:24 PM  
Inj Volume : 5.0 µl

Acq. Method : D:\CHEM32\1\METHODS\ZCY-0D.M  
Last changed : 5/11/2020 3:34:54 PM by QLL  
(modified after loading)  
Analysis Method : D:\CHEM32\1\METHODS\ZCY-0D.M  
Last changed : 6/2/2020 5:30:50 PM by QLL  
(modified after loading)  
Method Info : AD-H, Hexane/iPrOH=90/10, 0.8mL/min, 254nm, 30 oC

Sample Info : AD-H, Hexane/iPrOH=70/30, 1.0 mL/min, 254nm, 30 oC

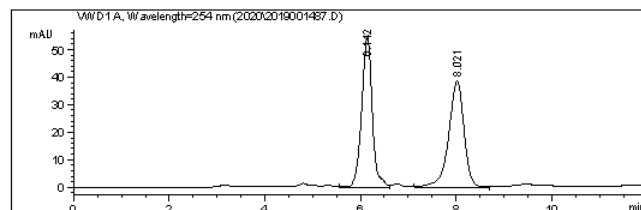

# Area Percent Report

Sorted By : Signal  
Multiplier: : 1.0000  
Dilution: : 1.0000  
Sample Amount: : 1.00000 [ng/ul] (not used in calc.)  
Do not use Multiplier & Dilution Factor with ISTDs

Signal 1: VWD1 A, Wavelength=254 nm

| Peak # | RetTime [min] | Type | Width [min] | Area mAU  | Height [mAU] | Area %  |
|--------|---------------|------|-------------|-----------|--------------|---------|
| 1      | 6.142         | VV   | 0.2340      | 853.19476 | 54.80981     | 49.7292 |
| 2      | 8.021         | VV   | 0.3383      | 862.48773 | 38.74603     | 50.2708 |

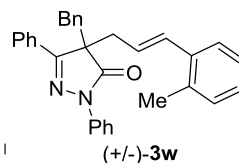

Instrument 1 6/2/2020 5:33:40 PM QLL

Page 1 of 2

Data File D:\CHEM32\1\DATA\2020\2019001488.D  
Sample Name: JDW-10-27B

=====

Acq. Operator : QLL  
Acq. Instrument : Instrument 1 Location : Vial 66  
Injection Date : 5/11/2020 3:36:59 PM  
Inj Volume : 5.0 µl

Acq. Method : D:\CHEM32\1\METHODS\ZCY-0D.M  
Last changed : 5/11/2020 3:35:29 PM by QLL  
(modified after loading)  
Analysis Method : D:\CHEM32\1\METHODS\ZCY-0D.M  
Last changed : 6/2/2020 5:30:50 PM by QLL  
(modified after loading)  
Method Info : AD-H, Hexane/iPrOH=90/10, 0.8mL/min, 254nm, 30 oC

Sample Info : AD-H, Hexane/iPrOH=70/30, 1.0 mL/min, 254nm, 30 oC

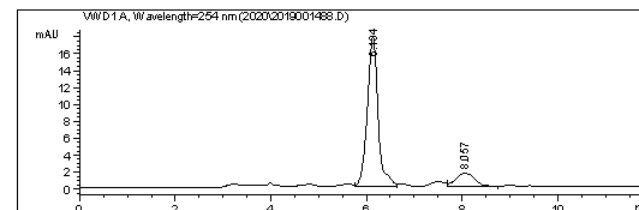

# Area Percent Report

Sorted By : Signal  
Multiplier: : 1.0000  
Dilution: : 1.0000  
Sample Amount: : 1.00000 [ng/ul] (not used in calc.)  
Do not use Multiplier & Dilution Factor with ISTDs

Signal 1: VWD1 A, Wavelength=254 nm

| Peak # | RetTime [min] | Type | Width [min] | Area mAU  | Height [mAU] | Area %  |
|--------|---------------|------|-------------|-----------|--------------|---------|
| 1      | 6.134         | VV   | 0.2362      | 280.77866 | 17.82407     | 86.5796 |
| 2      | 8.057         | VV   | 0.4418      | 43.52259  | 1.56078      | 13.4204 |

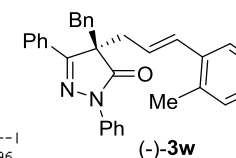

Instrument 1 6/2/2020 5:34:24 PM QLL

Page 1 of 2

Data File D:\CHEM32\1\DATA\2020\2019001476.D  
Sample Name: JDW-11-30B-rac

=====

|                 |                                                     |                     |
|-----------------|-----------------------------------------------------|---------------------|
| Acq. Operator   | : QLL                                               |                     |
| Acq. Instrument | : Instrument 1                                      | Location : Vial 66  |
| Injection Date  | : 5/9/2020 6:21:47 PM                               |                     |
|                 |                                                     | Inj Volume : 5.0 µl |
| Acq. Method     | : D:\CHEM32\1\METHODS\ZCY-0D.M                      |                     |
| Last changed    | : 5/9/2020 6:09:19 PM by QLL                        |                     |
|                 | (modified after loading)                            |                     |
| Analysis Method | : D:\CHEM32\1\METHODS\ZCY-0D.M                      |                     |
| Last changed    | : 6/2/2020 5:26:52 PM by QLL                        |                     |
|                 | (modified after loading)                            |                     |
| Method Info     | : AD-H, Hexane/iPrOH=90/10, 0.8mL/min, 254nm, 30 oC |                     |

Sample Info : AD-H, Hexane/iPrOH=70/30, 1.0 mL/min, 254nm, 30 oC

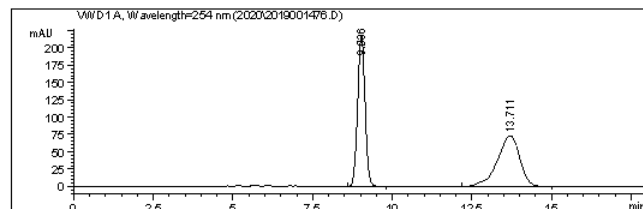

Area Percent Report

Sorted By : Signal

|                |                                       |
|----------------|---------------------------------------|
| Multiplier:    | : 1.0000                              |
| Dilution:      | : 1.0000                              |
| Sample Amount: | : 1.00000 [ng/ul] (not used in calc.) |

Do not use Multiplier & Dilution Factor with ISTDs

Signal 1: VWD1 A, Wavelength=254 nm

| Peak # | RetTime [min] | Type | Width [min] | Area mAU   | Height [mAU] | Area %  |
|--------|---------------|------|-------------|------------|--------------|---------|
| 1      | 9.036         | BB   | 0.2537      | 3545.67920 | 218.10135    | 49.9659 |
| 2      | 13.711        | BB   | 0.7481      | 3550.51660 | 72.98550     | 50.0341 |

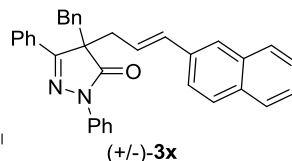

Instrument 1 6/2/2020 5:26:56 PM QLL

Page 1 of 2

Data File D:\CHEM32\1\DATA\2020\2019001477.D  
Sample Name: JDW-11-30B-rac

=====

|                 |                                                     |                     |
|-----------------|-----------------------------------------------------|---------------------|
| Acq. Operator   | : QLL                                               |                     |
| Acq. Instrument | : Instrument 1                                      | Location : Vial 66  |
| Injection Date  | : 5/9/2020 6:43:09 PM                               |                     |
|                 |                                                     | Inj Volume : 5.0 µl |
| Acq. Method     | : D:\CHEM32\1\METHODS\ZCY-0D.M                      |                     |
| Last changed    | : 5/9/2020 6:41:47 PM by QLL                        |                     |
|                 | (modified after loading)                            |                     |
| Analysis Method | : D:\CHEM32\1\METHODS\ZCY-0D.M                      |                     |
| Last changed    | : 6/2/2020 5:26:52 PM by QLL                        |                     |
|                 | (modified after loading)                            |                     |
| Method Info     | : AD-H, Hexane/iPrOH=90/10, 0.8mL/min, 254nm, 30 oC |                     |

Sample Info : AD-H, Hexane/iPrOH=70/30, 1.0 mL/min, 254nm, 30 oC

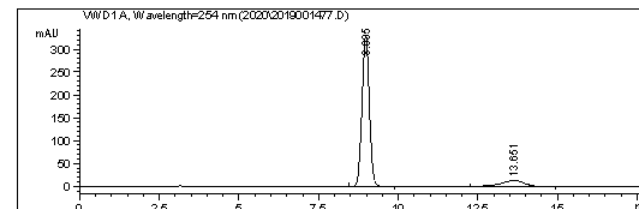

Area Percent Report

Sorted By : Signal

|                |                                       |
|----------------|---------------------------------------|
| Multiplier:    | : 1.0000                              |
| Dilution:      | : 1.0000                              |
| Sample Amount: | : 1.00000 [ng/ul] (not used in calc.) |

Do not use Multiplier & Dilution Factor with ISTDs

Signal 1: VWD1 A, Wavelength=254 nm

| Peak # | RetTime [min] | Type | Width [min] | Area mAU   | Height [mAU] | Area %  |
|--------|---------------|------|-------------|------------|--------------|---------|
| 1      | 8.985         | VB   | 0.2517      | 5312.62646 | 330.37787    | 89.4225 |
| 2      | 13.651        | BB   | 0.7515      | 628.41156  | 12.97366     | 10.5775 |

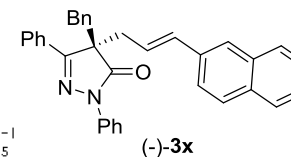

Data File D:\CHEM32\1\DATA\2020\2019001490.D  
Sample Name: JDW-10-27C-rac

=====

|                 |                                                     |                    |
|-----------------|-----------------------------------------------------|--------------------|
| Acq. Operator   | : QLL                                               |                    |
| Acq. Instrument | : Instrument 1                                      | Location : Vial 66 |
| Injection Date  | : 5/11/2020 4:14:10 PM                              |                    |
|                 | Inj Volume : 5.0 µl                                 |                    |
| Acq. Method     | : D:\CHEM32\1\METHODS\ZCY-0D.M                      |                    |
| Last changed    | : 5/11/2020 4:13:19 PM by QLL                       |                    |
|                 | (modified after loading)                            |                    |
| Analysis Method | : D:\CHEM32\1\METHODS\ZCY-0D.M                      |                    |
| Last changed    | : 6/2/2020 5:30:50 PM by QLL                        |                    |
|                 | (modified after loading)                            |                    |
| Method Info     | : AD-H, Hexane/iPrOH=90/10, 0.8mL/min, 254nm, 30 oC |                    |

Sample Info : AD-H, Hexane/iPrOH=70/30, 1.0 mL/min, 254nm, 30 oC

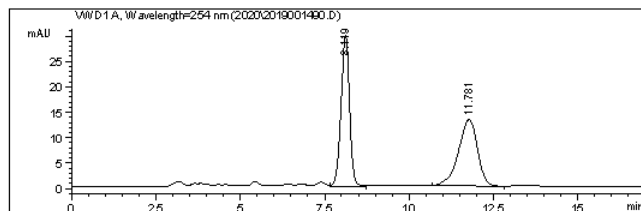

Area Percent Report

Sorted By : Signal

|                |                                       |
|----------------|---------------------------------------|
| Multiplier:    | : 1.0000                              |
| Dilution:      | : 1.0000                              |
| Sample Amount: | : 1.00000 [ng/ul] (not used in calc.) |

Do not use Multiplier & Dilution Factor with ISTDs

Signal 1: VWD1 A, Wavelength=254 nm

| Peak # | RetTime [min] | Type | Width [min] | Area mAU  | Height [mAU] | Area %  |
|--------|---------------|------|-------------|-----------|--------------|---------|
| 1      | 8.119         | VV   | 0.2707      | 518.17963 | 29.67385     | 50.3103 |
| 2      | 11.781        | BB   | 0.6014      | 511.78732 | 13.09909     | 49.6897 |

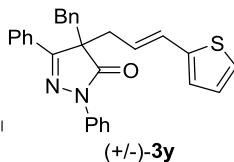

Data File D:\CHEM32\1\DATA\2020\2019001491.D  
Sample Name: JDW-10-27C

=====

|                 |                                                     |                    |
|-----------------|-----------------------------------------------------|--------------------|
| Acq. Operator   | : QLL                                               |                    |
| Acq. Instrument | : Instrument 1                                      | Location : Vial 66 |
| Injection Date  | : 5/11/2020 4:36:12 PM                              |                    |
|                 | Inj Volume : 5.0 µl                                 |                    |
| Acq. Method     | : D:\CHEM32\1\METHODS\ZCY-0D.M                      |                    |
| Last changed    | : 5/11/2020 4:31:07 PM by QLL                       |                    |
|                 | (modified after loading)                            |                    |
| Analysis Method | : D:\CHEM32\1\METHODS\ZCY-0D.M                      |                    |
| Last changed    | : 6/2/2020 5:30:50 PM by QLL                        |                    |
|                 | (modified after loading)                            |                    |
| Method Info     | : AD-H, Hexane/iPrOH=90/10, 0.8mL/min, 254nm, 30 oC |                    |

Sample Info : AD-H, Hexane/iPrOH=70/30, 1.0 mL/min, 254nm, 30 oC

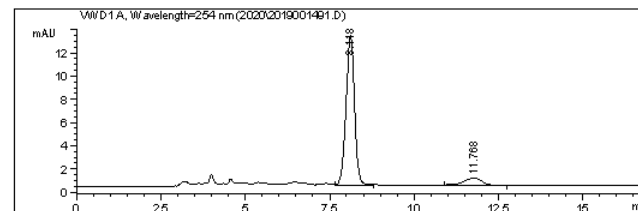

Area Percent Report

Sorted By : Signal

|                |                                       |
|----------------|---------------------------------------|
| Multiplier:    | : 1.0000                              |
| Dilution:      | : 1.0000                              |
| Sample Amount: | : 1.00000 [ng/ul] (not used in calc.) |

Do not use Multiplier & Dilution Factor with ISTDs

Signal 1: VWD1 A, Wavelength=254 nm

| Peak # | RetTime [min] | Type | Width [min] | Area mAU  | Height [mAU] | Area %  |
|--------|---------------|------|-------------|-----------|--------------|---------|
| 1      | 8.118         | VB   | 0.2692      | 227.97473 | 12.96466     | 90.2717 |
| 2      | 11.768        | BB   | 0.5788      | 24.56808  | 6.35961e-1   | 9.7283  |

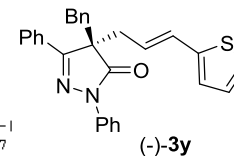

Data File D:\CHEM32\1\DATA\2020\2019001727.D  
 Sample Name: JDW-11-59B-rac

=====

Acq. Operator : QLL  
 Acq. Instrument : Instrument 1 Location : Vial 66  
 Injection Date : 6/16/2020 10:52:44 PM  
 Inj Volume : 5.0 µl

Acq. Method : D:\CHEM32\1\METHODS\ZCY-0D.M  
 Last changed : 6/16/2020 10:50:37 PM by QLL  
 (modified after loading)

Analysis Method : D:\CHEM32\1\METHODS\ZCY-0D.M  
 Last changed : 6/17/2020 10:06:03 AM by QLL  
 (modified after loading)

Method Info : AD-H, Hexane/iPrOH=70/30, 1.0mL/min, 254nm, 30 oC

Sample Info : IE, Hexane/iPrOH=80/20, 1.0 mL/min, 254nm, 30 oC

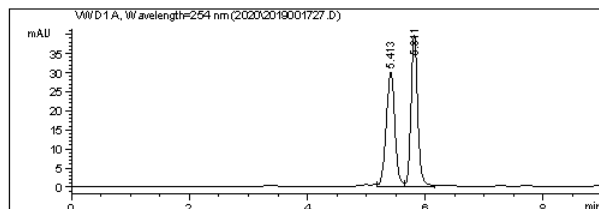

Area Percent Report

Sorted By : Signal

Multiplier: : 1.0000

Dilution: : 1.0000

Sample Amount: : 1.00000 [ng/ul] (not used in calc.)

Use Multiplier & Dilution Factor with ISTDs

Signal 1: VWD1 A, Wavelength=254 nm

| Peak # | RetTime [min] | Type | Width [min] | Area mAU  | Height [mAU] | Area %  |
|--------|---------------|------|-------------|-----------|--------------|---------|
| 1      | 5.413         | VV   | 0.1566      | 303.78058 | 29.84245     | 49.4324 |
| 2      | 5.811         | VV   | 0.1210      | 310.75732 | 39.45861     | 50.5676 |

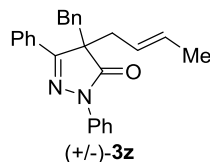

Instrument 1 6/17/2020 10:06:13 AM QLL

Page 1 of 2

Data File D:\CHEM32\1\DATA\2020\2019001728.D  
 Sample Name: JDW-11-59B

=====

Acq. Operator : QLL  
 Acq. Instrument : Instrument 1 Location : Vial 66  
 Injection Date : 6/16/2020 11:09:41 PM  
 Inj Volume : 5.0 µl

Acq. Method : D:\CHEM32\1\METHODS\ZCY-0D.M  
 Last changed : 6/16/2020 11:08:38 PM by QLL  
 (modified after loading)

Analysis Method : D:\CHEM32\1\METHODS\ZCY-0D.M  
 Last changed : 6/17/2020 10:06:03 AM by QLL  
 (modified after loading)

Method Info : AD-H, Hexane/iPrOH=70/30, 1.0mL/min, 254nm, 30 oC

Sample Info : IE, Hexane/iPrOH=80/20, 1.0 mL/min, 254nm, 30 oC

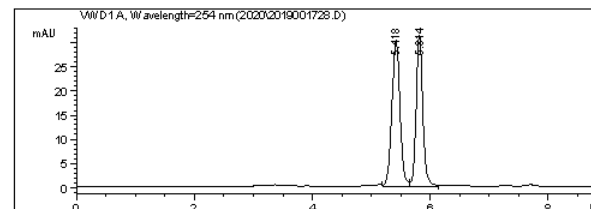

Area Percent Report

Sorted By : Signal

Multiplier: : 1.0000

Dilution: : 1.0000

Sample Amount: : 1.00000 [ng/ul] (not used in calc.)

Use Multiplier & Dilution Factor with ISTDs

Signal 1: VWD1 A, Wavelength=254 nm

| Peak # | RetTime [min] | Type | Width [min] | Area mAU  | Height [mAU] | Area %  |
|--------|---------------|------|-------------|-----------|--------------|---------|
| 1      | 5.418         | VV   | 0.1497      | 288.13882 | 30.05034     | 54.2410 |
| 2      | 5.814         | VV   | 0.1204      | 243.08031 | 31.08305     | 45.7590 |

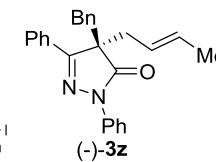

Page 1 of 2
